# Supplementary material for: High-throughput design of energetic molecules
Source: Royal Society of Chemistry journal article supplement (doi:10.1039/d3ta05002e), 2023-01-01
Supplement: d3ta05002e1.pdf [file d3ta05002e1.pdf]

## High-Throughput Design of Energetic Molecules

Jian Liu<sup>\*1</sup>, Shicao Zhao<sup>2</sup>, Bowen Duan<sup>2</sup>, Xudong He<sup>1</sup>, Chunming Yang<sup>3</sup>, Xuemei Pu<sup>4</sup>, Xinben Zhang<sup>6</sup>, Yonghao Xiao<sup>2</sup>,  
Fude Nie<sup>1</sup>, Wen Qian<sup>1</sup>, Geng Li<sup>5</sup>, Chaoyang Zhang<sup>\*1,7</sup>

<sup>1</sup>*Institute of Chemical Materials, China Academy of Engineering Physics (CAEP), P.O. Box 919-311, Mianyang, Sichuan 621999, China*

<sup>2</sup>*Institute of Computer Applications, China Academy of Engineering Physics (CAEP), P.O. Box 919-1201, Mianyang, Sichuan 621900, China*

<sup>3</sup>*School of Computer Science and Technology, Southwest University of Science & Technology, Mianyang, Sichuan 621010, China.*

<sup>4</sup>*College of Chemistry, Sichuan University, Chengdu 610064, China.*

<sup>5</sup>*National Supercomputer Center in Tianjin, Tianjin 300450, China.*

<sup>6</sup>*Shanghai Institute of Materia Medica, Chinese Academy of Sciences, Shanghai 201207, China*

<sup>7</sup>*Beijing Computational Science Research Center, Beijing 100048, China.*

### Supplementary Information

|                                                                                             |           |
|---------------------------------------------------------------------------------------------|-----------|
| <b>Table S1 Hyper-parameters of D-MPNN.....</b>                                             | <b>2</b>  |
| <b>Table S2 Test scores of 10-fold cross-validations. ....</b>                              | <b>3</b>  |
| <b>Figure S1. Molecular skeletons used for HTC aided energetic molecules screening.....</b> | <b>4</b>  |
| <b>Table S3 Result of HTC-aided energetic molecules screening.....</b>                      | <b>5</b>  |
| <b>Table S4 Result of AI-aided energetic molecules screening.....</b>                       | <b>14</b> |
| <b>References.....</b>                                                                      | <b>34</b> |

**Table S1 Hyper-parameters of D-MPNN.**

| Hyper-parameter       | Value                            |
|-----------------------|----------------------------------|
| activation            | ReLU                             |
| batch size            | 32                               |
| D-MPNN depth          | 5                                |
| D-MPNN nodes          | 128                              |
| Dropout               | 0.0                              |
| global features       | rdkit 2D                         |
| FFN nodes             | 128                              |
| FFN layers            | 3                                |
| initial learning rate | 0.001                            |
| initial learning rate | 0.0001                           |
| number of folds       | 10                               |
| split sizes           | train : valid : test = 8 : 1 : 1 |
| total epochs          | 100                              |

**Table S2 Test scores of 10-fold cross-validations.**

| Score          | Fold | $BDE_{R-NO_2}$ | $\rho_{cryst}$       | $\Delta_f H_s^\ominus$ | $D$    | $P$   | $Q$    | $T$                  | $V$    |
|----------------|------|----------------|----------------------|------------------------|--------|-------|--------|----------------------|--------|
|                |      | (kJ/mol)       | (g/cm <sup>3</sup> ) | (kJ/mol)               | (km/s) | (GPa) | (kJ/g) | (K×10 <sup>3</sup> ) | (L/kg) |
| R <sup>2</sup> | 0    | 0.874          | 0.932                | 0.970                  | 0.988  | 0.983 | 0.976  | 0.977                | 0.993  |
|                | 1    | 0.898          | 0.929                | 0.979                  | 0.989  | 0.984 | 0.985  | 0.982                | 0.995  |
|                | 2    | 0.905          | 0.941                | 0.976                  | 0.985  | 0.972 | 0.963  | 0.965                | 0.990  |
|                | 3    | 0.907          | 0.951                | 0.975                  | 0.990  | 0.986 | 0.986  | 0.985                | 0.995  |
|                | 4    | 0.889          | 0.928                | 0.984                  | 0.985  | 0.977 | 0.984  | 0.982                | 0.989  |
|                | 5    | 0.873          | 0.924                | 0.976                  | 0.988  | 0.980 | 0.983  | 0.984                | 0.992  |
|                | 6    | 0.900          | 0.924                | 0.977                  | 0.988  | 0.983 | 0.966  | 0.969                | 0.993  |
|                | 7    | 0.883          | 0.926                | 0.966                  | 0.985  | 0.981 | 0.978  | 0.976                | 0.990  |
|                | 8    | 0.928          | 0.948                | 0.979                  | 0.988  | 0.986 | 0.986  | 0.983                | 0.993  |
|                | 9    | 0.890          | 0.955                | 0.981                  | 0.991  | 0.987 | 0.983  | 0.990                | 0.991  |
| RMSE           | 0    | 22             | 0.038                | 51                     | 0.14   | 0.9   | 0.21   | 0.14                 | 10     |
|                | 1    | 15             | 0.040                | 40                     | 0.13   | 0.9   | 0.15   | 0.11                 | 8      |
|                | 2    | 17             | 0.035                | 43                     | 0.15   | 1.1   | 0.24   | 0.15                 | 11     |
|                | 3    | 18             | 0.035                | 43                     | 0.13   | 0.9   | 0.16   | 0.11                 | 8      |
|                | 4    | 20             | 0.040                | 36                     | 0.15   | 1.1   | 0.16   | 0.11                 | 11     |
|                | 5    | 21             | 0.038                | 45                     | 0.13   | 0.9   | 0.16   | 0.11                 | 10     |
|                | 6    | 18             | 0.040                | 39                     | 0.14   | 0.9   | 0.23   | 0.15                 | 9      |
|                | 7    | 17             | 0.045                | 57                     | 0.16   | 1.1   | 0.19   | 0.13                 | 11     |
|                | 8    | 15             | 0.032                | 38                     | 0.13   | 0.8   | 0.15   | 0.10                 | 10     |
|                | 9    | 18             | 0.035                | 42                     | 0.13   | 0.9   | 0.18   | 0.09                 | 10     |
| MAE            | 0    | 13             | 0.028                | 32                     | 0.10   | 0.6   | 0.13   | 0.08                 | 6      |
|                | 1    | 11             | 0.029                | 27                     | 0.10   | 0.6   | 0.10   | 0.08                 | 6      |
|                | 2    | 11             | 0.027                | 30                     | 0.10   | 0.6   | 0.13   | 0.08                 | 7      |
|                | 3    | 12             | 0.026                | 29                     | 0.10   | 0.6   | 0.11   | 0.08                 | 6      |
|                | 4    | 13             | 0.031                | 24                     | 0.11   | 0.7   | 0.10   | 0.07                 | 8      |
|                | 5    | 12             | 0.030                | 32                     | 0.10   | 0.7   | 0.11   | 0.07                 | 7      |
|                | 6    | 11             | 0.030                | 27                     | 0.09   | 0.6   | 0.15   | 0.09                 | 7      |
|                | 7    | 12             | 0.030                | 31                     | 0.11   | 0.7   | 0.11   | 0.08                 | 6      |
|                | 8    | 10             | 0.026                | 26                     | 0.10   | 0.6   | 0.10   | 0.07                 | 7      |
|                | 9    | 13             | 0.029                | 25                     | 0.10   | 0.6   | 0.13   | 0.07                 | 7      |

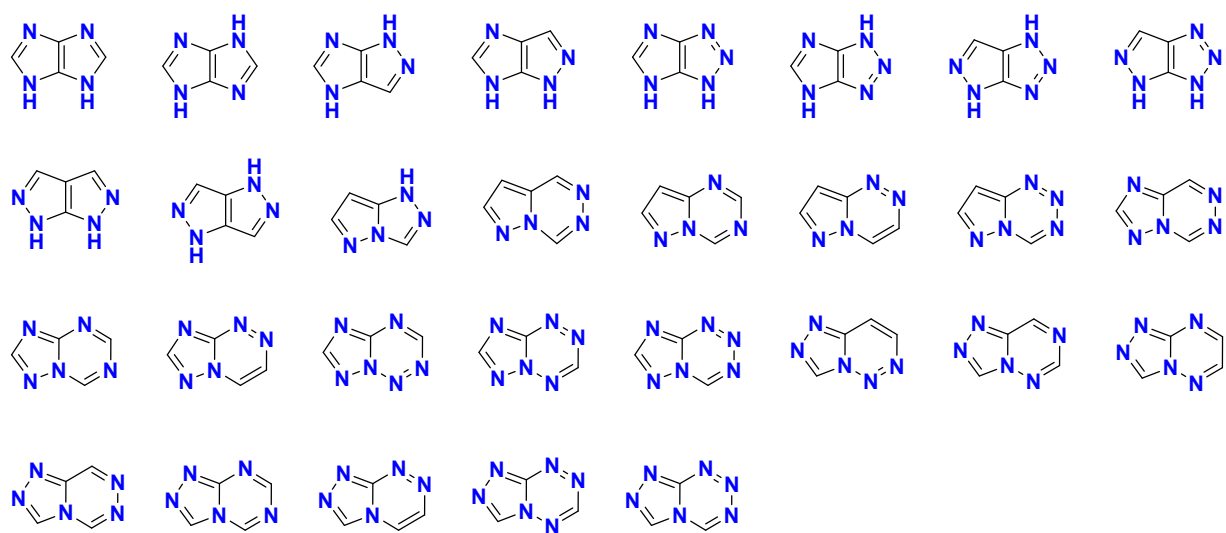

**Figure S1. Molecular skeletons used for HTC aided energetic molecules screening.**

**Table S3 Result of HTC-aided energetic molecules screening.**

| SMILES                                                              | Density<br>g/cm <sup>3</sup> | HOF<br>kJ/mol | D<br>km/s | P<br>GPa | BDE<br>kJ/mol | Source           |
|---------------------------------------------------------------------|------------------------------|---------------|-----------|----------|---------------|------------------|
| O=[N+](=[O-])c1nn([N+](=O)[O-])c2c([N+](=O)[O-])nn([N+](=O)[O-])c12 | 1.943                        | 506           | 9.37      | 41.5     | 140.4         | ref <sup>1</sup> |
| Nc1c([N+](=O)[O-])nnc2c([N+](=O)[O-])c([N+](=O)[O-])nn12            | 1.909                        | 378           | 8.55      | 34.2     | 248.4         | ref <sup>2</sup> |
| Nn1nc([N+](=O)[O-])c2c1c([N+](=O)[O-])nn2N                          | 1.857                        | 475           | 8.48      | 33.1     | 300.2         | ref <sup>1</sup> |
| Nc1c([N+](=O)[O-])nnc2nc([N+](=O)[O-])nn12                          | 1.893                        | 466           | 8.45      | 33.3     | 259.3         | ref <sup>3</sup> |
| O=[N+](=[O-])c1nn([N+](=O)[O-])c2c1c([N+](=O)[O-])nn2[N+](=O)[O-]   | 1.945                        | 527           | 9.4       | 41.8     | 166.9         |                  |
| O=[N+](=[O-])c1nn([N+](=O)[O-])c2c1nc([N+](=O)[O-])n2[N+](=O)[O-]   | 1.95                         | 492           | 9.38      | 41.6     | 181.7         |                  |
| O=[N+](=[O-])c1nc2nc([N+](=O)[O-])n([N+](=O)[O-])c2n1[N+](=O)[O-]   | 1.963                        | 458           | 9.38      | 41.9     | 181           |                  |
| O=[N+](=[O-])c1nn([N+](=O)[O-])c2nc([N+](=O)[O-])n([N+](=O)[O-])c12 | 1.947                        | 494           | 9.37      | 41.5     | 174.4         |                  |
| O=[N+](=[O-])c1nc2c(nnn2[N+](=O)[O-])n1[N+](=O)[O-]                 | 1.914                        | 591           | 9.36      | 41       | 170.7         |                  |
| O=[N+](=[O-])c1nc2c(nc([N+](=O)[O-])n2[N+](=O)[O-])n1[N+](=O)[O-]   | 1.958                        | 438           | 9.34      | 41.4     | 191.3         |                  |
| O=[N+](=[O-])c1nn2c([N+](=O)[O-])nn([N+](=O)[O-])c2c1[N+](=O)[O-]   | 1.932                        | 477           | 9.3       | 40.7     | 224.3         |                  |
| O=[N+](=[O-])c1nc2nn[nH]c2n1[N+](=O)[O-]                            | 1.938                        | 533           | 9.1       | 39.1     | 231.9         |                  |
| O=[N+](=[O-])c1nnnc2nnc([N+](=O)[O-])n12                            | 1.884                        | 754           | 9.09      | 38.4     | 213.2         |                  |
| O=[N+](=[O-])c1nnc2nnc([N+](=O)[O-])n2c1[N+](=O)[O-]                | 1.921                        | 616           | 9.08      | 38.7     | 240.3         |                  |
| O=[N+](=[O-])c1nnc([N+](=O)[O-])n2c([N+](=O)[O-])nnc12              | 1.918                        | 619           | 9.07      | 38.6     | 203.8         |                  |
| O=[N+](=[O-])c1nn2c([N+](=O)[O-])n[nH]c2c1[N+](=O)[O-]              | 1.966                        | 377           | 9.06      | 39       | 260.3         |                  |
| O=[N+](=[O-])c1n[nH]c2nc([N+](=O)[O-])n([N+](=O)[O-])c12            | 1.953                        | 406           | 9.06      | 38.9     | 184.5         |                  |
| O=[N+](=[O-])c1nn([N+](=O)[O-])c2c([N+](=O)[O-])n[nH]c12            | 1.954                        | 398           | 9.05      | 38.8     | 187.8         |                  |
| O=[N+](=[O-])c1nn([N+](=O)[O-])c2[nH]nnc12                          | 1.922                        | 527           | 9.04      | 38.4     | 217.4         |                  |
| O=[N+](=[O-])c1nn([N+](=O)[O-])c2nn[nH]c12                          | 1.92                         | 528           | 9.03      | 38.3     | 214.5         |                  |
| Nc1nn2c([N+](=O)[O-])nn([N+](=O)[O-])c2c1[N+](=O)[O-]               | 1.933                        | 442           | 9.02      | 38.3     | 255.1         |                  |
| Nc1c([N+](=O)[O-])nn2c([N+](=O)[O-])nn([N+](=O)[O-])c12             | 1.942                        | 423           | 9.02      | 38.5     | 233.6         |                  |
| O=[N+](=[O-])c1nc([N+](=O)[O-])c2nnc([N+](=O)[O-])n2n1              | 1.925                        | 559           | 9.02      | 38.3     | 233.2         |                  |
| O=[N+](=[O-])c1n[nH]c2c1nc([N+](=O)[O-])n2[N+](=O)[O-]              | 1.95                         | 388           | 9.02      | 38.5     | 229.9         |                  |
| O=[N+](=[O-])c1n[nH]c2c1c([N+](=O)[O-])nn2[N+](=O)[O-]              | 1.942                        | 398           | 9.01      | 38.3     | 176.8         |                  |
| O=[N+](=[O-])c1nc2nnc([N+](=O)[O-])c([N+](=O)[O-])n2n1              | 1.924                        | 549           | 9         | 38.1     | 248.5         |                  |
| O=[N+](=[O-])c1nc([N+](=O)[O-])n2c([N+](=O)[O-])nnc2n1              | 1.918                        | 558           | 9         | 38       | 186           |                  |
| Nc1nn([N+](=O)[O-])c2c([N+](=O)[O-])nn([N+](=O)[O-])c12             | 1.924                        | 451           | 9         | 38.1     | 139.1         |                  |
| O=[N+](=[O-])c1nc2c([N+](=O)[O-])nnc([N+](=O)[O-])n2n1              | 1.923                        | 544           | 8.99      | 38       | 215           |                  |
| O=[N+](=[O-])c1nc2nnc([N+](=O)[O-])n2nc1[N+](=O)[O-]                | 1.919                        | 544           | 8.98      | 37.9     | 247.6         |                  |
| O=[N+](=[O-])c1nn2c([N+](=O)[O-])nnc2c1[N+](=O)[O-]                 | 1.904                        | 576           | 8.97      | 37.6     | 258.3         |                  |
| Nn1nc([N+](=O)[O-])c2c1nc([N+](=O)[O-])n2[N+](=O)[O-]               | 1.916                        | 451           | 8.97      | 37.8     | 224.5         |                  |

|                                                                  |       |     |      |      |       |
|------------------------------------------------------------------|-------|-----|------|------|-------|
| O=[N+](O)c1nc2[nH]nnc2n1[N+](=O)[O-]                             | 1.918 | 494 | 8.97 | 37.8 | 209.8 |
| O=[N+](O)c1nn2c([N+](=O)[O-])nnc([N+](=O)[O-])c2c1[N+](=O)[O-]   | 1.909 | 494 | 8.96 | 37.6 | 230.6 |
| Nn1nc([N+](=O)[O-])c2c1c([N+](=O)[O-])nn2[N+](=O)[O-]            | 1.9   | 484 | 8.96 | 37.5 | 206   |
| Nc1nn([N+](=O)[O-])c2c1c([N+](=O)[O-])nn2[N+](=O)[O-]            | 1.916 | 436 | 8.95 | 37.6 | 158.3 |
| Nn1nc([N+](=O)[O-])c2nc([N+](=O)[O-])n([N+](=O)[O-])c21          | 1.913 | 433 | 8.94 | 37.4 | 240.1 |
| O=[N+](O)c1nc2nnnc([N+](=O)[O-])n2n1                             | 1.891 | 643 | 8.94 | 37.2 | 239   |
| O=[N+](O)c1nc2nc([N+](=O)[O-])n([N+](=O)[O-])c2[nH]1             | 1.95  | 328 | 8.93 | 37.8 | 225.7 |
| O=[N+](O)c1n[nH]c2nnn([N+](=O)[O-])c12                           | 1.905 | 495 | 8.93 | 37.3 | 137.4 |
| O=[N+](O)c1nn([N+](=O)[O-])c2cnn([N+](=O)[O-])c12                | 1.897 | 453 | 8.93 | 37.2 | 120.8 |
| Nn1nc([N+](=O)[O-])n2nc([N+](=O)[O-])c([N+](=O)[O-])c12          | 1.899 | 456 | 8.92 | 37.1 | 278.5 |
| O=[N+](O)c1nnc2c([N+](=O)[O-])c([N+](=O)[O-])nn2n1               | 1.902 | 543 | 8.92 | 37.2 | 248.1 |
| O=[N+](O)c1nc2c(nc([N+](=O)[O-])n2[N+](=O)[O-])[nH]1             | 1.949 | 323 | 8.92 | 37.7 | 218.3 |
| O=[N+](O)c1nc([N+](=O)[O-])n2nc([N+](=O)[O-])nc2n1               | 1.925 | 486 | 8.92 | 37.4 | 208.9 |
| Nn1nc([N+](=O)[O-])c2c([N+](=O)[O-])nn([N+](=O)[O-])c21          | 1.893 | 472 | 8.92 | 37.1 | 199.2 |
| Nc1nn([N+](=O)[O-])c2nc([N+](=O)[O-])n([N+](=O)[O-])c12          | 1.92  | 405 | 8.92 | 37.4 | 177.4 |
| Nc1nn([N+](=O)[O-])c2c1nc([N+](=O)[O-])n2[N+](=O)[O-]            | 1.918 | 408 | 8.92 | 37.4 | 169.5 |
| O=[N+](O)c1nc2ncn([N+](=O)[O-])c2n1[N+](=O)[O-]                  | 1.906 | 423 | 8.92 | 37.2 | 141.6 |
| Nc1nn([N+](=O)[O-])c2c([N+](=O)[O-])c([N+](=O)[O-])nn12          | 1.912 | 413 | 8.91 | 37.2 | 224.8 |
| O=[N+](O)c1n[nH]c2c1nnn2[N+](=O)[O-]                             | 1.912 | 471 | 8.91 | 37.2 | 199.4 |
| O=[N+](O)c1nn2c([N+](=O)[O-])c([N+](=O)[O-])nnc2c1[N+](=O)[O-]   | 1.897 | 472 | 8.9  | 36.9 | 237.8 |
| O=[N+](O)c1nc([N+](=O)[O-])n2nc([N+](=O)[O-])c([N+](=O)[O-])c2n1 | 1.914 | 416 | 8.89 | 37   | 235.7 |
| Nn1c([N+](=O)[O-])nc2nc([N+](=O)[O-])n([N+](=O)[O-])c21          | 1.909 | 400 | 8.88 | 36.9 | 242.4 |
| Nn1c([N+](=O)[O-])nc2c1nc([N+](=O)[O-])n2[N+](=O)[O-]            | 1.904 | 403 | 8.87 | 36.8 | 249.3 |
| Nn1c([N+](=O)[O-])nc2c([N+](=O)[O-])nn([N+](=O)[O-])c21          | 1.875 | 474 | 8.87 | 36.4 | 236.9 |
| O=[N+](O)c1cc2n([N+](=O)[O-])nc([N+](=O)[O-])n2n1                | 1.891 | 423 | 8.87 | 36.6 | 219.8 |
| O=[N+](O)c1nc2c([N+](=O)[O-])nn([N+](=O)[O-])c2[nH]1             | 1.915 | 367 | 8.87 | 36.9 | 219.5 |
| O=[N+](O)c1nc2c(ncn2[N+](=O)[O-])n1[N+](=O)[O-]                  | 1.899 | 404 | 8.87 | 36.7 | 160   |
| O=[N+](O)c1cnn2c([N+](=O)[O-])nn([N+](=O)[O-])c12                | 1.873 | 460 | 8.86 | 36.4 | 224.4 |
| O=[N+](O)c1nc2nnn([N+](=O)[O-])c2[nH]1                           | 1.907 | 451 | 8.86 | 36.7 | 223.7 |
| O=[N+](O)c1nn([N+](=O)[O-])c2c1cnn2[N+](=O)[O-]                  | 1.872 | 461 | 8.86 | 36.3 | 148.9 |
| O=[N+](O)c1nn([N+](=O)[O-])c2c1ncn2[N+](=O)[O-]                  | 1.88  | 434 | 8.85 | 36.3 | 146.6 |
| Nn1c([N+](=O)[O-])nc2c1c([N+](=O)[O-])nn2[N+](=O)[O-]            | 1.876 | 441 | 8.83 | 36.1 | 225.1 |
| Nc1nc2nc([N+](=O)[O-])n([N+](=O)[O-])c2n1[N+](=O)[O-]            | 1.919 | 337 | 8.83 | 36.6 | 191.8 |
| Nc1nc2nnn([N+](=O)[O-])c2n1[N+](=O)[O-]                          | 1.886 | 492 | 8.83 | 36.2 | 154.8 |
| O=[N+](O)c1nc2c(nnn2[N+](=O)[O-])[nH]1                           | 1.899 | 442 | 8.82 | 36.3 | 202.9 |
| Nc1nc2c(c([N+](=O)[O-])nn2[N+](=O)[O-])n1[N+](=O)[O-]            | 1.901 | 378 | 8.82 | 36.4 | 180.2 |
| Nc1nn([N+](=O)[O-])c2nnn([N+](=O)[O-])c12                        | 1.874 | 505 | 8.81 | 35.9 | 136.7 |
| Nc1nn([N+](=O)[O-])c2c1nnn2[N+](=O)[O-]                          | 1.874 | 506 | 8.81 | 35.9 | 128.3 |

|                                                          |       |     |      |      |       |
|----------------------------------------------------------|-------|-----|------|------|-------|
| Nc1nc2c([N+](=O)[O-])nn([N+](=O)[O-])c2n1[N+](=O)[O-]    | 1.9   | 365 | 8.8  | 36.2 | 189.6 |
| O=[N+](O)c1nc2c([nH]1)c([N+](=O)[O-])nn2[N+](=O)[O-]     | 1.906 | 327 | 8.79 | 36.1 | 209.9 |
| Nc1nc2c(nc([N+](=O)[O-])n2[N+](=O)[O-])n1[N+](=O)[O-]    | 1.92  | 310 | 8.79 | 36.3 | 201   |
| Nn1nc([N+](=O)[O-])c2c1nnn2[N+](=O)[O-]                  | 1.846 | 551 | 8.79 | 35.5 | 168.3 |
| O=[N+](O)c1nc2cnn([N+](=O)[O-])c2n1[N+](=O)[O-]          | 1.876 | 402 | 8.79 | 35.8 | 143   |
| O=[N+](O)c1nc2c(cnn2[N+](=O)[O-])n1[N+](=O)[O-]          | 1.877 | 390 | 8.78 | 35.7 | 151.9 |
| Nc1nc2c(nnn2[N+](=O)[O-])n1[N+](=O)[O-]                  | 1.88  | 469 | 8.77 | 35.7 | 178.8 |
| Nn1c([N+](=O)[O-])nc2c1nnn2[N+](=O)[O-]                  | 1.843 | 530 | 8.75 | 35.1 | 238.8 |
| Nn1c([N+](=O)[O-])nc2nnn([N+](=O)[O-])c21                | 1.843 | 531 | 8.75 | 35.1 | 234.9 |
| Nn1nc([N+](=O)[O-])c2nnn([N+](=O)[O-])c21                | 1.843 | 536 | 8.75 | 35.1 | 207.4 |
| O=[N+](O)c1nn2cnn([N+](=O)[O-])c2c1[N+](=O)[O-]          | 1.853 | 411 | 8.73 | 35.1 | 190.4 |
| Nc1nnc2nnc([N+](=O)[O-])n2c1[N+](=O)[O-]                 | 1.903 | 608 | 8.71 | 35.4 | 272.9 |
| Nc1nn2c([N+](=O)[O-])nnc([N+](=O)[O-])c2c1[N+](=O)[O-]   | 1.911 | 431 | 8.63 | 34.9 | 266.2 |
| Nc1nnc([N+](=O)[O-])c2nnc([N+](=O)[O-])n12               | 1.889 | 580 | 8.62 | 34.6 | 250.3 |
| Nc1c([N+](=O)[O-])nn2c([N+](=O)[O-])nnc([N+](=O)[O-])c12 | 1.92  | 400 | 8.62 | 34.9 | 225.7 |
| Nc1nnc2nnc([N+](=O)[O-])c([N+](=O)[O-])n12               | 1.883 | 585 | 8.61 | 34.4 | 261.2 |
| Nc1c([N+](=O)[O-])nn2c([N+](=O)[O-])c([N+](=O)[O-])nnc12 | 1.922 | 387 | 8.61 | 34.8 | 248.1 |
| Nc1nnc([N+](=O)[O-])n2nc([N+](=O)[O-])c([N+](=O)[O-])c12 | 1.92  | 392 | 8.61 | 34.8 | 245.2 |
| Nc1c([N+](=O)[O-])nn2c([N+](=O)[O-])nc([N+](=O)[O-])nc12 | 1.932 | 362 | 8.61 | 34.9 | 239   |
| Nc1nnc([N+](=O)[O-])c2c([N+](=O)[O-])c([N+](=O)[O-])nn12 | 1.908 | 414 | 8.6  | 34.6 | 239.7 |
| Nc1nnc2c([N+](=O)[O-])c([N+](=O)[O-])nn2c1[N+](=O)[O-]   | 1.908 | 409 | 8.59 | 34.5 | 265.6 |
| Nc1nnc([N+](=O)[O-])n2c([N+](=O)[O-])nnc12               | 1.888 | 558 | 8.58 | 34.3 | 215.9 |
| Nc1nn2c([N+](=O)[O-])c([N+](=O)[O-])nnc2c1[N+](=O)[O-]   | 1.909 | 393 | 8.57 | 34.4 | 256.9 |
| O=[N+](O)c1n[nH]c2c([N+](=O)[O-])n[nH]c12                | 1.941 | 346 | 8.56 | 34.6 | 290.3 |
| Nn1nc([N+](=O)[O-])c2[nH]nc([N+](=O)[O-])c21             | 1.905 | 410 | 8.55 | 34.2 | 290.9 |
| Nc1nnc2nc([N+](=O)[O-])nn2c1[N+](=O)[O-]                 | 1.901 | 512 | 8.55 | 34.1 | 272.4 |
| O=[N+](O)c1cnn2nnc([N+](=O)[O-])n12                      | 1.849 | 611 | 8.55 | 33.5 | 244.1 |
| O=[N+](O)c1cnn2c([N+](=O)[O-])nnc([N+](=O)[O-])c12       | 1.865 | 481 | 8.55 | 33.7 | 237.2 |
| O=[N+](O)c1n[nH]c2[nH]nc([N+](=O)[O-])c12                | 1.927 | 367 | 8.55 | 34.4 | 217.3 |
| Nc1nc([N+](=O)[O-])c2nnc([N+](=O)[O-])n2n1               | 1.896 | 515 | 8.54 | 34   | 252.5 |
| Nc1c([N+](=O)[O-])nnc2nnc([N+](=O)[O-])n12               | 1.885 | 536 | 8.54 | 33.9 | 250.9 |
| Nn1nc([N+](=O)[O-])c2c([N+](=O)[O-])n[nH]c21             | 1.9   | 416 | 8.54 | 34.1 | 241.1 |
| Nc1nc([N+](=O)[O-])n2c([N+](=O)[O-])nnc2n1               | 1.894 | 517 | 8.54 | 34   | 211.5 |
| Nc1nn2c([N+](=O)[O-])nc([N+](=O)[O-])nc2c1[N+](=O)[O-]   | 1.913 | 352 | 8.53 | 34.1 | 257.6 |
| Nc1nc([N+](=O)[O-])n2nc([N+](=O)[O-])c([N+](=O)[O-])c2n1 | 1.919 | 334 | 8.53 | 34.1 | 247.9 |
| O=[N+](O)c1nnc([N+](=O)[O-])n2cnn12                      | 1.861 | 570 | 8.52 | 33.5 | 239.6 |
| O=[N+](O)c1ncnc2nnc([N+](=O)[O-])n12                     | 1.868 | 554 | 8.52 | 33.5 | 199.2 |
| Nc1nn2c([N+](=O)[O-])nnc2c1[N+](=O)[O-]                  | 1.876 | 534 | 8.51 | 33.5 | 286.8 |
| O=[N+](O)c1nnc2nncn2c1[N+](=O)[O-]                       | 1.852 | 578 | 8.51 | 33.3 | 268.8 |
| O=[N+](O)c1nncn2c([N+](=O)[O-])nnc12                     | 1.854 | 577 | 8.51 | 33.3 | 252.1 |

|                                                          |       |     |      |      |       |
|----------------------------------------------------------|-------|-----|------|------|-------|
| O=[N+](O)c1cc2nnc([N+](=O)[O-])c([N+](=O)[O-])n2n1       | 1.875 | 428 | 8.51 | 33.6 | 246.5 |
| Nc1nnc2c([N+](=O)[O-])nnc([N+](=O)[O-])n12               | 1.877 | 532 | 8.51 | 33.5 | 225.7 |
| O=[N+](O)c1nn2c([N+](=O)[O-])cnc2c1[N+](=O)[O-]          | 1.858 | 464 | 8.5  | 33.3 | 270.2 |
| Nc1c([N+](=O)[O-])nn2c([N+](=O)[O-])nnnc12               | 1.894 | 493 | 8.5  | 33.7 | 258.4 |
| Nc1nc([N+](=O)[O-])nc2c([N+](=O)[O-])c([N+](=O)[O-])nn12 | 1.909 | 335 | 8.5  | 33.8 | 253.3 |
| Nc1nn2c([N+](=O)[O-])n[nH]c2c1[N+](=O)[O-]               | 1.93  | 331 | 8.49 | 34   | 302.3 |
| Nc1nnc([N+](=O)[O-])n2nc([N+](=O)[O-])nc12               | 1.893 | 483 | 8.48 | 33.5 | 252.5 |
| O=[N+](O)c1cc2c([N+](=O)[O-])nnc([N+](=O)[O-])n2n1       | 1.874 | 402 | 8.48 | 33.3 | 205.1 |
| Nc1nn2nc([N+](=O)[O-])nnc2c1[N+](=O)[O-]                 | 1.883 | 499 | 8.47 | 33.3 | 272.4 |
| O=[N+](O)c1nn2c([N+](=O)[O-])ncnc2c1[N+](=O)[O-]         | 1.865 | 414 | 8.46 | 33.1 | 246.9 |
| O=[N+](O)c1cc2nc([N+](=O)[O-])nc([N+](=O)[O-])n2n1       | 1.883 | 369 | 8.46 | 33.2 | 227.9 |
| O=[N+](O)c1nncc2nnc([N+](=O)[O-])n12                     | 1.836 | 581 | 8.46 | 32.7 | 187   |
| Nc1nc2nnc([N+](=O)[O-])n2nc1[N+](=O)[O-]                 | 1.891 | 465 | 8.45 | 33.2 | 266.5 |
| O=[N+](O)c1nnc2c([N+](=O)[O-])cnn2c1[N+](=O)[O-]         | 1.85  | 443 | 8.45 | 32.8 | 252.6 |
| O=[N+](O)c1cn2c([N+](=O)[O-])nnc2nn1                     | 1.845 | 556 | 8.45 | 32.8 | 252.6 |
| Nc1nn2c([N+](=O)[O-])nnc2nc1[N+](=O)[O-]                 | 1.891 | 469 | 8.45 | 33.2 | 248.2 |
| O=[N+](O)c1nn2c([N+](=O)[O-])nncc2c1[N+](=O)[O-]         | 1.861 | 414 | 8.45 | 32.9 | 238   |
| Nc1nnc2c([N+](=O)[O-])nc([N+](=O)[O-])nn12               | 1.889 | 472 | 8.45 | 33.2 | 232.8 |
| Nc1n[nH]c2c([N+](=O)[O-])nn([N+](=O)[O-])c12             | 1.916 | 334 | 8.45 | 33.5 | 222.3 |
| Nn1nc([N+](=O)[O-])c2c([N+](=O)[O-])nn(N)c21             | 1.857 | 447 | 8.44 | 32.8 | 268.8 |
| Nc1c([N+](=O)[O-])nn2c([N+](=O)[O-])nn(N)c12             | 1.887 | 383 | 8.43 | 33   | 302.5 |
| Nn1nc([N+](=O)[O-])c2nn[nH]c21                           | 1.852 | 556 | 8.43 | 32.6 | 301.2 |
| Nc1nn2c([N+](=O)[O-])nn([N+](=O)[O-])c2c1N               | 1.89  | 375 | 8.43 | 33   | 250.5 |
| O=[N+](O)c1nc([N+](=O)[O-])n2ncc([N+](=O)[O-])c2n1       | 1.867 | 386 | 8.43 | 32.8 | 246   |
| Nc1nc([N+](=O)[O-])nc2nnc([N+](=O)[O-])n12               | 1.886 | 467 | 8.43 | 33   | 223.5 |
| Nc1n[nH]c2c1c([N+](=O)[O-])nn2[N+](=O)[O-]               | 1.908 | 334 | 8.43 | 33.2 | 220.1 |
| Nc1nnc2c([N+](=O)[O-])c([N+](=O)[O-])nn2n1               | 1.873 | 483 | 8.42 | 32.8 | 248.1 |
| Nc1nc2nnc([N+](=O)[O-])c([N+](=O)[O-])n2n1               | 1.887 | 458 | 8.42 | 33   | 247.3 |
| O=[N+](O)c1cn2nc([N+](=O)[O-])c([N+](=O)[O-])c2nn1       | 1.847 | 425 | 8.42 | 32.5 | 237.9 |
| O=[N+](O)c1nc2nnc([N+](=O)[O-])n2n1                      | 1.852 | 516 | 8.41 | 32.5 | 268.3 |
| O=[N+](O)c1cnc2nnc([N+](=O)[O-])n2n1                     | 1.859 | 504 | 8.41 | 32.6 | 260   |
| Nc1nnc([N+](=O)[O-])c2nc([N+](=O)[O-])nn12               | 1.887 | 454 | 8.41 | 32.9 | 236.5 |
| Nc1nn(N)c2c([N+](=O)[O-])nn([N+](=O)[O-])c12             | 1.871 | 405 | 8.41 | 32.8 | 221.3 |
| O=[N+](O)c1nn2ennc([N+](=O)[O-])c2c1[N+](=O)[O-]         | 1.838 | 438 | 8.41 | 32.3 | 195.4 |
| O=[N+](O)n1ncc2c1cnn2[N+](=O)[O-]                        | 1.842 | 443 | 8.41 | 32.4 | 135.5 |
| Nc1nn2c([N+](=O)[O-])nn(N)c2c1[N+](=O)[O-]               | 1.87  | 397 | 8.4  | 32.6 | 315.1 |
| O=[N+](O)c1n[nH]c2nn[nH]c12                              | 1.867 | 512 | 8.4  | 32.6 | 306.2 |
| O=[N+](O)c1cnn2c([N+](=O)[O-])nnnc12                     | 1.825 | 566 | 8.4  | 32.2 | 268.4 |
| Nc1nnnc2c([N+](=O)[O-])c([N+](=O)[O-])nn12               | 1.863 | 491 | 8.4  | 32.5 | 262.5 |
| O=[N+](O)c1ncn2nc([N+](=O)[O-])c([N+](=O)[O-])c2n1       | 1.865 | 370 | 8.4  | 32.6 | 251.6 |



|                                              |       |     |      |      |       |
|----------------------------------------------|-------|-----|------|------|-------|
| Nc1nnc2nc([N+](=O)[O-])c([N+](=O)[O-])nn12   | 1.88  | 456 | 8.4  | 32.7 | 249.7 |
| Nc1nc([N+](=O)[O-])n2nc([N+](=O)[O-])nc2n1   | 1.9   | 420 | 8.4  | 32.9 | 238.1 |
| O=[N+](O)c1nnc([N+](=O)[O-])n2ncnc12         | 1.85  | 517 | 8.4  | 32.5 | 214.3 |
| Nc1nnc2nc([N+](=O)[O-])nc([N+](=O)[O-])n12   | 1.88  | 460 | 8.4  | 32.7 | 193.1 |
| Nc1n[nH]c2c([N+](=O)[O-])c([N+](=O)[O-])nn12 | 1.911 | 309 | 8.39 | 33   | 267.9 |
| Nc1nc([N+](=O)[O-])nn2c([N+](=O)[O-])nnc12   | 1.881 | 450 | 8.39 | 32.7 | 242.5 |
| Nc1nc2c([N+](=O)[O-])nn([N+](=O)[O-])c2[nH]1 | 1.924 | 288 | 8.39 | 33.1 | 235.5 |
| Nc1nn([N+](=O)[O-])c2c(N)nn([N+](=O)[O-])c12 | 1.883 | 367 | 8.39 | 32.7 | 157.6 |
| O=[N+](O)n1cnc2nn[nH]c21                     | 1.85  | 528 | 8.38 | 32.3 | 242.2 |
| O=[N+](O)c1nnc2ncnn2c1[N+](=O)[O-]           | 1.843 | 513 | 8.38 | 32.2 | 236.5 |
| O=[N+](O)c1ncnn2c([N+](=O)[O-])nnc12         | 1.849 | 503 | 8.38 | 32.2 | 225.6 |
| Nc1nn([N+](=O)[O-])c2c([N+](=O)[O-])nn(N)c12 | 1.866 | 396 | 8.38 | 32.5 | 217.5 |
| Nc1c([N+](=O)[O-])nn2c([N+](=O)[O-])n[nH]c12 | 1.914 | 294 | 8.37 | 32.9 | 277.6 |
| O=[N+](O)c1ncn2c([N+](=O)[O-])nnc2n1         | 1.862 | 473 | 8.37 | 32.3 | 237.1 |
| O=[N+](O)c1cnn2c([N+](=O)[O-])n[nH]c12       | 1.88  | 340 | 8.36 | 32.4 | 286.4 |
| Nc1nn2c(N)nn([N+](=O)[O-])c2c1[N+](=O)[O-]   | 1.882 | 354 | 8.36 | 32.5 | 263.3 |
| O=[N+](O)c1nnc2nncn12                        | 1.788 | 712 | 8.36 | 31.5 | 256.9 |
| Nc1nn([N+](=O)[O-])c2nc([N+](=O)[O-])[nH]c12 | 1.911 | 290 | 8.36 | 32.7 | 232.2 |
| O=[N+](O)c1cnn2c([N+](=O)[O-])nnc2n1         | 1.842 | 504 | 8.36 | 32   | 228.8 |
| Nn1nc([N+](=O)[O-])c2nc([N+](=O)[O-])n(N)c21 | 1.843 | 421 | 8.35 | 32   | 298.9 |
| O=[N+](O)c1nnc2nncn12                        | 1.794 | 696 | 8.35 | 31.5 | 258   |
| Nc1nn([N+](=O)[O-])c2c1c([N+](=O)[O-])nn2N   | 1.86  | 388 | 8.35 | 32.2 | 217.3 |
| Nc1nn([N+](=O)[O-])c2[nH]nc([N+](=O)[O-])c12 | 1.891 | 321 | 8.35 | 32.5 | 202.6 |
| O=[N+](O)c1nc([N+](=O)[O-])n2cncn2n1         | 1.847 | 491 | 8.35 | 32   | 202   |
| Nc1nn([N+](=O)[O-])c2c([N+](=O)[O-])n[nH]c12 | 1.892 | 316 | 8.35 | 32.4 | 169.1 |
| O=[N+](O)c1nn2ncnc2c1[N+](=O)[O-]            | 1.821 | 535 | 8.34 | 31.7 | 252.8 |
| O=[N+](O)c1cn2nc([N+](=O)[O-])nc2nn1         | 1.848 | 478 | 8.34 | 31.9 | 248.6 |
| O=[N+](O)c1nc2nncn2nc1[N+](=O)[O-]           | 1.832 | 514 | 8.34 | 31.8 | 244   |
| Nc1nc([N+](=O)[O-])nc2nc([N+](=O)[O-])nn12   | 1.896 | 395 | 8.34 | 32.5 | 241   |
| O=[N+](O)c1nc2ncnc([N+](=O)[O-])n2n1         | 1.867 | 446 | 8.34 | 32.2 | 232   |
| Nc1nc2c([N+](=O)[O-])nnc([N+](=O)[O-])n2n1   | 1.872 | 439 | 8.34 | 32.2 | 226   |
| Nc1nc2[nH]nc([N+](=O)[O-])c2n1[N+](=O)[O-]   | 1.901 | 295 | 8.34 | 32.4 | 212.6 |
| O=[N+](O)c1nc2c([N+](=O)[O-])nncn2n1         | 1.84  | 496 | 8.34 | 31.8 | 208.1 |
| O=[N+](O)c1nnc2c([N+](=O)[O-])cnn2n1         | 1.829 | 515 | 8.33 | 31.7 | 254   |
| Nc1c([N+](=O)[O-])nn2nc([N+](=O)[O-])nnc12   | 1.873 | 427 | 8.33 | 32.1 | 242.7 |
| O=[N+](O)c1cc2nnc([N+](=O)[O-])n2n1          | 1.84  | 489 | 8.33 | 31.8 | 240.4 |
| O=[N+](O)c1nc2cn[nH]c2n1[N+](=O)[O-]         | 1.873 | 339 | 8.33 | 32.1 | 225.1 |
| O=[N+](O)c1nn([N+](=O)[O-])c2[nH]ncc12       | 1.871 | 342 | 8.33 | 32.1 | 223.2 |
| Nc1cnn2c([N+](=O)[O-])nn([N+](=O)[O-])c12    | 1.843 | 395 | 8.33 | 31.8 | 211.4 |
| O=[N+](O)n1ncc2nn[nH]c21                     | 1.83  | 534 | 8.33 | 31.7 | 199.9 |

|                                              |       |     |      |      |       |
|----------------------------------------------|-------|-----|------|------|-------|
| O=[N+](O)c1n[nH]c2[nH]nnc12                  | 1.833 | 528 | 8.32 | 31.7 | 282.9 |
| Nc1nnc2nnnc([N+](=O)[O-])n12                 | 1.806 | 670 | 8.32 | 31.4 | 236.1 |
| O=[N+](O)c1n[nH]c2c1ncn2[N+](=O)[O-]         | 1.881 | 319 | 8.32 | 32.1 | 234.5 |
| O=[N+](O)c1nc2cnnc([N+](=O)[O-])n2n1         | 1.84  | 485 | 8.32 | 31.7 | 232.4 |
| O=[N+](O)c1nn([N+](=O)[O-])c2cn[nH]c12       | 1.861 | 352 | 8.32 | 31.9 | 217   |
| Nn1nc([N+](=O)[O-])c2c1nc([N+](=O)[O-])n2N   | 1.842 | 396 | 8.31 | 31.6 | 282.5 |
| Nc1nn(N)c2c([N+](=O)[O-])c([N+](=O)[O-])nn12 | 1.86  | 365 | 8.31 | 31.9 | 277.1 |
| Nn1c([N+](=O)[O-])nc2[nH]nc([N+](=O)[O-])c21 | 1.87  | 333 | 8.31 | 31.9 | 274.6 |
| O=[N+](O)c1nce2nnc([N+](=O)[O-])n2n1         | 1.834 | 489 | 8.31 | 31.6 | 224.3 |
| Nc1nn(N)c2c1c([N+](=O)[O-])nn2[N+](=O)[O-]   | 1.851 | 379 | 8.31 | 31.7 | 204.9 |
| Nc1nn([N+](=O)[O-])c2c1c(N)nn2[N+](=O)[O-]   | 1.865 | 352 | 8.31 | 31.9 | 180.2 |
| Nn1nc([N+](=O)[O-])c2[nH]nnc21               | 1.839 | 518 | 8.3  | 31.6 | 308.1 |
| Nc1nc2c([N+](=O)[O-])n[nH]c2n1[N+](=O)[O-]   | 1.905 | 269 | 8.3  | 32.2 | 259.9 |
| O=[N+](O)c1ncn2nc([N+](=O)[O-])nc2n1         | 1.864 | 424 | 8.3  | 31.8 | 239.3 |
| Nc1nnnc2nnc([N+](=O)[O-])n12                 | 1.807 | 655 | 8.3  | 31.2 | 238.7 |
| Nn1c([N+](=O)[O-])nc2c([N+](=O)[O-])n[nH]c21 | 1.864 | 335 | 8.29 | 31.7 | 280.6 |
| Nc1nn([N+](=O)[O-])c2nc([N+](=O)[O-])n(N)c12 | 1.847 | 375 | 8.29 | 31.5 | 243.9 |
| Nc1nc2c(c([N+](=O)[O-])nn2N)n1[N+](=O)[O-]   | 1.869 | 334 | 8.29 | 31.8 | 241.5 |
| Nc1nn([N+](=O)[O-])c2[nH]c([N+](=O)[O-])nc12 | 1.889 | 290 | 8.29 | 32   | 237.8 |
| Nc1n[nH]c2c1nc([N+](=O)[O-])n2[N+](=O)[O-]   | 1.896 | 281 | 8.29 | 32.1 | 235.9 |
| Nc1nc2nc([N+](=O)[O-])nc([N+](=O)[O-])n2n1   | 1.888 | 380 | 8.29 | 32   | 208.5 |
| Nc1n[nH]c2nc([N+](=O)[O-])n([N+](=O)[O-])c12 | 1.897 | 279 | 8.29 | 32.1 | 191.7 |
| O=[N+](O)c1nc([N+](=O)[O-])c2nncn2n1         | 1.835 | 478 | 8.29 | 31.5 | 191.7 |
| Nn1nc([N+](=O)[O-])n2nce([N+](=O)[O-])c12    | 1.817 | 417 | 8.28 | 31.2 | 295.4 |
| Nn1nc([N+](=O)[O-])c2[nH]c([N+](=O)[O-])nc21 | 1.88  | 300 | 8.28 | 31.8 | 284.6 |
| O=[N+](O)c1cc2[nH]nc([N+](=O)[O-])n2n1       | 1.886 | 287 | 8.28 | 31.9 | 265.3 |
| Nc1nn([N+](=O)[O-])c2c1nc([N+](=O)[O-])n2N   | 1.845 | 374 | 8.28 | 31.5 | 235.4 |
| Nc1n[nH]c2nnn([N+](=O)[O-])c12               | 1.834 | 515 | 8.28 | 31.4 | 194.1 |
| O=[N+](O)c1n[nH]c2cnn([N+](=O)[O-])c12       | 1.861 | 328 | 8.28 | 31.6 | 128.1 |
| Nn1ncc2c1c([N+](=O)[O-])nn2[N+](=O)[O-]      | 1.82  | 403 | 8.27 | 31.1 | 219.6 |
| Nc1nc2c([nH]1)c([N+](=O)[O-])nn2[N+](=O)[O-] | 1.891 | 276 | 8.27 | 31.8 | 216.1 |
| Nc1nn(N)c2c1nc([N+](=O)[O-])n2[N+](=O)[O-]   | 1.858 | 341 | 8.27 | 31.5 | 215.9 |
| Nn1ncc2c1nc([N+](=O)[O-])n2[N+](=O)[O-]      | 1.841 | 367 | 8.27 | 31.4 | 213.7 |
| O=[N+](O)c1nc([N+](=O)[O-])n2ncnc2n1         | 1.847 | 438 | 8.27 | 31.4 | 185.3 |
| O=[N+](O)n1nce2cnn([N+](=O)[O-])c21          | 1.815 | 410 | 8.27 | 31.1 | 121.6 |
| Nn1c([N+](=O)[O-])nc2c1nc([N+](=O)[O-])n2N   | 1.841 | 366 | 8.26 | 31.2 | 304.3 |
| Nn1nc([N+](=O)[O-])c2nc([N+](=O)[O-])[nH]c21 | 1.869 | 309 | 8.26 | 31.5 | 272.8 |
| Nc1nc2c(nc([N+](=O)[O-])n2[N+](=O)[O-])n1N   | 1.887 | 284 | 8.26 | 31.7 | 248.2 |
| Nc1nc2c([N+](=O)[O-])nn([N+](=O)[O-])c2n1N   | 1.865 | 326 | 8.26 | 31.5 | 234.5 |
| O=[N+](O)c1nn([N+](=O)[O-])c2[nH]enc12       | 1.877 | 290 | 8.26 | 31.6 | 214.1 |

|                                              |       |     |      |      |       |
|----------------------------------------------|-------|-----|------|------|-------|
| Nc1nn(N)c2nc([N+](=O)[O-])n([N+](=O)[O-])c12 | 1.862 | 327 | 8.26 | 31.4 | 199   |
| Nn1c([N+](=O)[O-])nc2nc([N+](=O)[O-])n(N)c21 | 1.837 | 368 | 8.25 | 31.1 | 304.8 |
| Nc1nc2nc([N+](=O)[O-])n([N+](=O)[O-])c2n1N   | 1.889 | 275 | 8.25 | 31.7 | 239.6 |
| Nc1nn([N+](=O)[O-])c2c([N+](=O)[O-])cnn12    | 1.84  | 358 | 8.25 | 31.2 | 211.4 |
| Nn1nc([N+](=O)[O-])n2nc([N+](=O)[O-])cc12    | 1.825 | 380 | 8.24 | 31   | 279.7 |
| Nc1nn([N+](=O)[O-])c2[nH]nnc12               | 1.84  | 487 | 8.24 | 31.1 | 240.4 |
| Nc1nc2c(c([N+](=O)[O-])nn2[N+](=O)[O-])n1N   | 1.857 | 327 | 8.24 | 31.3 | 228.9 |
| O=[N+](O)c1nn2cnnnc2c1[N+](=O)[O-]           | 1.802 | 512 | 8.24 | 30.7 | 226.9 |
| O=[N+](O)c1nc2[nH]ncc2n1[N+](=O)[O-]         | 1.867 | 299 | 8.24 | 31.4 | 198   |
| O=[N+](O)c1n[nH]c2ncn([N+](=O)[O-])c12       | 1.857 | 313 | 8.24 | 31.2 | 145.8 |
| Nn1c([N+](=O)[O-])nc2nn[nH]c21               | 1.824 | 507 | 8.23 | 30.9 | 304.8 |
| Nn1c([N+](=O)[O-])nc2[nH]c([N+](=O)[O-])nc21 | 1.879 | 275 | 8.23 | 31.4 | 292.6 |
| Nn1c([N+](=O)[O-])nc2nc([N+](=O)[O-])[nH]c21 | 1.879 | 276 | 8.23 | 31.4 | 291   |
| Nc1nc2nn[nH]c2n1[N+](=O)[O-]                 | 1.84  | 484 | 8.23 | 31.1 | 272.7 |
| Nc1nc2c([N+](=O)[O-])nn(N)c2n1[N+](=O)[O-]   | 1.858 | 319 | 8.23 | 31.2 | 260.1 |
| Nc1c([N+](=O)[O-])nn2c(N)nn([N+](=O)[O-])c12 | 1.866 | 306 | 8.23 | 31.3 | 225   |
| Nn1ncc2nc([N+](=O)[O-])n([N+](=O)[O-])c21    | 1.824 | 376 | 8.23 | 30.9 | 212.1 |
| O=[N+](O)c1nc2c(cnn2[N+](=O)[O-])[nH]1       | 1.875 | 277 | 8.23 | 31.3 | 209   |
| Nc1cc2n([N+](=O)[O-])nc([N+](=O)[O-])n2n1    | 1.835 | 351 | 8.23 | 31   | 191.8 |
| O=[N+](O)c1cc2nnc([N+](=O)[O-])nn2n1         | 1.828 | 445 | 8.22 | 30.8 | 230.5 |
| Nn1ncc2c([N+](=O)[O-])nn([N+](=O)[O-])c21    | 1.82  | 375 | 8.22 | 30.8 | 209.9 |
| Nc1nn([N+](=O)[O-])c2c1nc(N)n2[N+](=O)[O-]   | 1.872 | 288 | 8.22 | 31.3 | 199.8 |
| O=[N+](O)c1n[nH]c2c1cnn2[N+](=O)[O-]         | 1.853 | 310 | 8.22 | 31.1 | 198.3 |
| O=[N+](O)n1cnc2ncn([N+](=O)[O-])c21          | 1.836 | 342 | 8.22 | 30.9 | 123.3 |
| Nn1c([N+](=O)[O-])nc2[nH]nnc21               | 1.823 | 500 | 8.21 | 30.7 | 303   |
| Nn1nc([N+](=O)[O-])c2c1nnn2N                 | 1.796 | 554 | 8.21 | 30.4 | 287.4 |
| O=[N+](O)c1nn2cn[nH]c2c1[N+](=O)[O-]         | 1.838 | 333 | 8.21 | 30.9 | 252.6 |
| Nc1nc2nc([N+](=O)[O-])n([N+](=O)[O-])c2[nH]1 | 1.912 | 211 | 8.21 | 31.6 | 227.6 |
| Nc1nc2c(nc([N+](=O)[O-])n2[N+](=O)[O-])[nH]1 | 1.907 | 216 | 8.21 | 31.5 | 221   |
| Nn1cnc2c1c([N+](=O)[O-])nn2[N+](=O)[O-]      | 1.826 | 356 | 8.21 | 30.7 | 204   |
| Nc1nn([N+](=O)[O-])c2c1cnn2[N+](=O)[O-]      | 1.828 | 356 | 8.21 | 30.8 | 133.8 |
| O=[N+](O)c1nc2nc([N+](=O)[O-])[nH]c2[nH]1    | 1.9   | 223 | 8.2  | 31.4 | 272.9 |
| Nc1nn2cnn([N+](=O)[O-])c2c1[N+](=O)[O-]      | 1.835 | 338 | 8.2  | 30.8 | 213.5 |
| Nn1cnc2c([N+](=O)[O-])nn([N+](=O)[O-])c21    | 1.826 | 352 | 8.2  | 30.7 | 205.7 |
| O=[N+](O)n1cnc2[nH]nnc21                     | 1.814 | 498 | 8.2  | 30.5 | 180.2 |
| Nc1nc2nc([N+](=O)[O-])[nH]c2n1[N+](=O)[O-]   | 1.906 | 208 | 8.19 | 31.4 | 263.9 |
| Nc1nc2[nH]nnc2n1[N+](=O)[O-]                 | 1.829 | 478 | 8.19 | 30.6 | 249.6 |
| Nc1nc2nc(N)n([N+](=O)[O-])c2n1[N+](=O)[O-]   | 1.888 | 245 | 8.19 | 31.2 | 237.8 |
| O=[N+](O)c1nnnc2ncnn12                       | 1.784 | 631 | 8.19 | 30.2 | 233.3 |
| Nc1nn([N+](=O)[O-])c2cc([N+](=O)[O-])nn12    | 1.838 | 325 | 8.19 | 30.7 | 218   |

|                                        |       |     |      |      |       |
|----------------------------------------|-------|-----|------|------|-------|
| O=[N+](O)c1nc2c([N+](=O)O)n[nH]c2[nH]1 | 1.877 | 248 | 8.18 | 31   | 253.3 |
| Nc1nn([N+](=O)O)c2nc(N)([N+](=O)O)c12  | 1.862 | 283 | 8.18 | 30.9 | 187.3 |
| Nc1c([N+](=O)O)nn2cnn([N+](=O)O)c12    | 1.835 | 325 | 8.18 | 30.6 | 181.8 |
| Nn1nc([N+](=O)O)c2c1cnn2[N+](=O)O      | 1.801 | 385 | 8.18 | 30.2 | 161.6 |
| O=[N+](O)c1nc2[nH]nc([N+](=O)O)c2[nH]1 | 1.88  | 240 | 8.17 | 31   | 272.3 |
| Nc1nc2nc([N+](=O)O)n(N)c2n1[N+](=O)O   | 1.863 | 277 | 8.17 | 30.8 | 257.5 |
| Nc1nc2c(nc([N+](=O)O)n2N)n1[N+](=O)O   | 1.862 | 276 | 8.17 | 30.8 | 255.3 |
| Nn1nc([N+](=O)O)c2c1cnn2[N+](=O)O      | 1.818 | 347 | 8.17 | 30.3 | 181.4 |
| Nc1nc2cnn([N+](=O)O)c2n1[N+](=O)O      | 1.836 | 315 | 8.17 | 30.5 | 155.4 |
| O=[N+](O)c1nc2[nH]c([N+](=O)O)nc2[nH]1 | 1.895 | 210 | 8.16 | 31   | 274.7 |
| O=[N+](O)c1nc2nnncn2n1                 | 1.783 | 614 | 8.16 | 29.9 | 252.8 |
| Nn1c([N+](=O)O)nc2c1cnn2[N+](=O)O      | 1.8   | 375 | 8.16 | 30.1 | 232.6 |
| Nc1nn([N+](=O)O)c2nn[nH]c12            | 1.818 | 480 | 8.16 | 30.3 | 203.7 |
| Nn1nc([N+](=O)O)c2cnn([N+](=O)O)c21    | 1.799 | 378 | 8.16 | 30.1 | 196.3 |
| O=[N+](O)n1cnc2c1cnn2[N+](=O)O         | 1.834 | 311 | 8.16 | 30.4 | 139.1 |
| Nc1nc2[nH]c([N+](=O)O)nc2n1[N+](=O)O   | 1.897 | 202 | 8.15 | 31   | 249   |
| Nc1nc2c(nc(N)n2[N+](=O)O)n1[N+](=O)O   | 1.877 | 239 | 8.15 | 30.8 | 242.1 |
| O=[N+](O)c1cnn2cnn([N+](=O)O)c12       | 1.8   | 367 | 8.15 | 30   | 178.3 |
| Nc1nn([N+](=O)O)c2ncn([N+](=O)O)c12    | 1.839 | 300 | 8.15 | 30.4 | 128.2 |
| Nn1c([N+](=O)O)nc2cnn([N+](=O)O)c21    | 1.794 | 374 | 8.14 | 29.9 | 216.8 |
| O=[N+](O)c1nc2cnn([N+](=O)O)c2[nH]1    | 1.854 | 265 | 8.14 | 30.5 | 216   |
| Nn1nc([N+](=O)O)c2ncn([N+](=O)O)c21    | 1.817 | 334 | 8.14 | 30.1 | 215.7 |
| Nn1cnc2c1nc([N+](=O)O)n2[N+](=O)O      | 1.836 | 299 | 8.14 | 30.3 | 213.7 |
| Nn1cnc2nc([N+](=O)O)n([N+](=O)O)c21    | 1.838 | 298 | 8.14 | 30.4 | 201.6 |
| Nc1nc2c(cnn2[N+](=O)O)n1[N+](=O)O      | 1.833 | 307 | 8.14 | 30.3 | 160.7 |
| Nc1nc2ncn([N+](=O)O)c2n1[N+](=O)O      | 1.845 | 276 | 8.13 | 30.3 | 152.5 |
| Nc1nn([N+](=O)O)c2c1cnn2[N+](=O)O      | 1.831 | 301 | 8.13 | 30.2 | 129.5 |
| Nn1cnc2nc([N+](=O)O)c([N+](=O)O)c12    | 1.794 | 365 | 8.12 | 29.8 | 250   |
| Nc1n[nH]c2c1nnn2[N+](=O)O              | 1.823 | 458 | 8.12 | 30.1 | 220.5 |
| O=[N+](O)c1nc2nc[nH]c2n1[N+](=O)O      | 1.86  | 246 | 8.12 | 30.4 | 203.4 |
| O=[N+](O)c1nn([N+](=O)O)c2ccnn12       | 1.787 | 376 | 8.12 | 29.7 | 165.9 |
| Nc1nnnc2nc([N+](=O)O)nn12              | 1.813 | 553 | 8.11 | 29.9 | 258.7 |
| O=[N+](O)n1nc2[nH]nnc21                | 1.782 | 503 | 8.11 | 29.5 | 163.9 |
| O=[N+](O)c1nc2ncn([N+](=O)O)c2[nH]1    | 1.859 | 235 | 8.1  | 30.2 | 228.9 |
| Nc1nc2nnnc([N+](=O)O)n2n1              | 1.806 | 553 | 8.09 | 29.7 | 250.5 |
| Nn1c([N+](=O)O)nc2ncn([N+](=O)O)c21    | 1.812 | 312 | 8.09 | 29.7 | 219.4 |
| Nc1nn([N+](=O)O)c2c1nnn2N              | 1.795 | 498 | 8.09 | 29.6 | 217.7 |
| O=[N+](O)c1cc2n([N+](=O)O)ncn2n1       | 1.796 | 342 | 8.09 | 29.6 | 191.6 |
| Nc1nn(N)c2nnn([N+](=O)O)c12            | 1.785 | 512 | 8.09 | 29.5 | 188.9 |
| O=[N+](O)c1nn([N+](=O)O)c2nc[nH]c12    | 1.834 | 270 | 8.09 | 29.9 | 181.2 |

|                                               |       |     |      |      |       |
|-----------------------------------------------|-------|-----|------|------|-------|
| Nc1nc2c(ncn2[N+](=O)[O-])n1[N+](=O)[O-]       | 1.844 | 258 | 8.09 | 30   | 163.2 |
| Nc1nn([N+](=O)[O-])c2nnn(N)c12                | 1.786 | 506 | 8.08 | 29.4 | 235.9 |
| Nn1c([N+](=O)[O-])nc2c1ncn2[N+](=O)[O-]       | 1.812 | 307 | 8.08 | 29.6 | 219.7 |
| O=[N+](O)c1nc2[nH]cnc2n1[N+](=O)[O-]          | 1.847 | 245 | 8.08 | 30   | 195.2 |
| Nc1nc2nnn(N)c2n1[N+](=O)[O-]                  | 1.803 | 472 | 8.07 | 29.4 | 247.7 |
| O=[N+](O)c1nc2c(ncn2[N+](=O)[O-])[nH]1        | 1.85  | 229 | 8.06 | 29.8 | 204.7 |
| Nc1nn(N)c2c1nnn2[N+](=O)[O-]                  | 1.781 | 501 | 8.06 | 29.2 | 201.9 |
| Nc1nc2c(nnn2N)n1[N+](=O)[O-]                  | 1.805 | 463 | 8.05 | 29.4 | 257.9 |
| Nc1nc2nnn([N+](=O)[O-])c2[nH]1                | 1.823 | 427 | 8.05 | 29.6 | 219.7 |
| Nc1nnc([N+](=O)[O-])n2nc([N+](=O)[O-])c(N)c12 | 1.884 | 341 | 8.03 | 30   | 290.4 |
| O=[N+](O)c1nc2nn[nH]c2[nH]1                   | 1.831 | 388 | 8    | 29.2 | 305.2 |
| Nc1nn2c([N+](=O)[O-])nnc(N)c2c1[N+](=O)[O-]   | 1.873 | 344 | 8    | 29.7 | 296.1 |
| Nc1nn2c([N+](=O)[O-])nnc([N+](=O)[O-])c2c1N   | 1.867 | 351 | 8    | 29.6 | 261.8 |

**Table S4 Result of AI-aided energetic molecules screening.**

| SMILES                                                                                             | Density<br>g/cm <sup>3</sup> | HOF<br>kJ/mol | D<br>km/s | P<br>GPa | BDE<br>kJ/mol | Novel | Source           |
|----------------------------------------------------------------------------------------------------|------------------------------|---------------|-----------|----------|---------------|-------|------------------|
| <chem>Nc1nc([N+](=O)[O-])nn1N</chem>                                                               | 1.781                        | 174.2         | 8.11      | 29.6     | 282.6         | 1     | ref <sup>5</sup> |
| <chem>Nn1cnc([N+](=O)[O-])c1[N+](=O)[O-]</chem>                                                    | 1.785                        | 142.2         | 8.24      | 30.3     | 266.7         | 1     | ref <sup>6</sup> |
| <chem>Nn1nc([N+](=O)[O-])nc1[N+](=O)[O-]</chem>                                                    | 1.851                        | 236           | 8.92      | 36.6     | 267.9         |       | ref <sup>7</sup> |
| <chem>Nc1c([N+](=O)[O-])nc([N+](=O)[O-])n1N</chem>                                                 | 1.835                        | 123.2         | 8.35      | 32.1     | 290.8         | 1     | ref <sup>8</sup> |
| <chem>O=[N+](=[O-])c1nn([N+](=O)[O-])c2c([N+](=O)[O-])nn([N+](=O)[O-])c12</chem>                   | 1.943                        | 506.2         | 9.41      | 41.4     | 140.4         |       | ref <sup>1</sup> |
| <chem>NN=c1n([N+](=O)[O-])c([N+](=O)[O-])c([N+](=O)[O-])n1[N+](=O)[O-]</chem>                      | 1.917                        | 274           | 9.53      | 41.9     | 128.9         |       |                  |
| <chem>N=c1n([N+](=O)[O-])c([N+](=O)[O-])c([N+](=O)[O-])n1[N+](=O)[O-]</chem>                       | 1.947                        | 153           | 9.43      | 42       | 158.9         |       |                  |
| <chem>Nn1c([N+](=O)[O-])c([N+](=O)[O-])n([N+](=O)[O-])c1=NN[N+](=O)[O-]</chem>                     | 1.893                        | 281.5         | 9.32      | 39.5     | 130.9         |       |                  |
| <chem>O=[N+](=[O-])c1nn([N+](=O)[O-])c2nnn([N+](=O)[O-])c12</chem>                                 | 1.898                        | 593.3         | 9.31      | 40.2     | 123.4         | 1     |                  |
| <chem>O=[N+](=[O-])c1nn([N+](=O)[O-])c2nnnn12</chem>                                               | 1.92                         | 693.4         | 9.29      | 40.9     | 213.9         | 1     |                  |
| <chem>NN=c1n(N[N+](=O)[O-])c([N+](=O)[O-])c([N+](=O)[O-])n1N[N+](=O)[O-]</chem>                    | 1.882                        | 348.5         | 9.29      | 37.4     | 136.6         |       |                  |
| <chem>O=[N+](=[O-])c1nc2n([N+](=O)[O-])nc([N+](=O)[O-])n2n1</chem>                                 | 1.924                        | 535.5         | 9.28      | 39.8     | 211.9         |       |                  |
| <chem>O=[N+](=[O-])c1nn2c([N+](=O)[O-])nn([N+](=O)[O-])c2c1[N+](=O)[O-]</chem>                     | 1.932                        | 476.9         | 9.24      | 39.4     | 224.3         |       |                  |
| <chem>Nc1c([N+](=O)[O-])c([N+](=O)[O-])c([N+](=O)[O-])n1[N+](=O)[O-]</chem>                        | 1.919                        | 65.4          | 9.23      | 39.5     | 210           | 1     |                  |
| <chem>O=[N+](=[O-])NN=c1c2nc([N+](=O)[O-])n([N+](=O)[O-])c2nc([N+](=O)[O-])n1[N+](=O)[O-]</chem>   | 1.968                        | 576.2         | 9.2       | 38.7     | 128.5         | 1     |                  |
| <chem>Nc1c([N+](=O)[O-])c([N+](=O)[O-])n([N+](=O)[O-])c1[N+](=O)[O-]</chem>                        | 1.925                        | 17.9          | 9.15      | 38.7     | 199.9         | 1     |                  |
| <chem>O=[N+](=[O-])c1nc([N+](=O)[O-])c2c([N+](=O)[O-])nn([N+](=O)[O-])c2n1</chem>                  | 1.946                        | 494.8         | 9.15      | 38.3     | 170.8         |       |                  |
| <chem>O=[N+](=[O-])C1=NC(=C([N+](=O)[O-])[N+](=O)[O-])NN1[N+](=O)[O-]</chem>                       | 1.895                        | 163.1         | 9.15      | 38.4     | 140           | 1     |                  |
| <chem>NN1N=C([N+](=O)[O-])[N-][N+](=O)N=C1[N+](=O)[O-]</chem>                                      | 1.882                        | 311.8         | 9.13      | 37.9     | 144.9         | 1     |                  |
| <chem>Nc1c([N+](=O)[O-])nc([N+](=O)[O-])n1[N+](=O)[O-]</chem>                                      | 1.914                        | 138.8         | 9.12      | 38.3     | 222           | 1     |                  |
| <chem>NN1NC([N+](=O)[O-])=NC1=C([N+](=O)[O-])[N+](=O)[O-]</chem>                                   | 1.878                        | 184.4         | 9.12      | 36.4     | 152.9         |       |                  |
| <chem>Nc1noc(=N[N+](=O)[O-])n1[N+](=O)[O-]</chem>                                                  | 1.894                        | 166.9         | 9.12      | 37.5     | 128.8         | 1     |                  |
| <chem>NN=c1[nH]nc(N[N+](=O)[O-])n1[N+](=O)[O-]</chem>                                              | 1.906                        | 327.2         | 9.12      | 37.6     | 125           | 1     |                  |
| <chem>Nc1nc([N+](=O)[O-])n([N+](=O)[O-])c1[N+](=O)[O-]</chem>                                      | 1.904                        | 117.3         | 9.1       | 38.8     | 172.2         | 1     |                  |
| <chem>NC1=NN([N+](=O)[O-])C([N+](=O)[O-])=C([N+](=O)[O-])N1N</chem>                                | 1.912                        | 137.4         | 9.1       | 37.7     | 136.1         | 1     |                  |
| <chem>NC(N)=C1N=C([N+](=O)[O-])N([N+](=O)[O-])C([N+](=O)[O-])=C([N+](=O)[O-])N1[N+](=O)[O-]</chem> | 1.935                        | 69.4          | 9.09      | 38.4     | 131.3         | 1     |                  |
| <chem>Nc1c([N+](=O)[O-])n[n+](=O)nc([N+](=O)[O-])c1[N+](=O)[O-]</chem>                             | 1.937                        | 133.1         | 9.08      | 39.4     | 241.9         | 1     |                  |
| <chem>Nn1nc([N+](=O)[O-])c2c1c([N+](=O)[O-])nn2[N+](=O)[O-]</chem>                                 | 1.9                          | 484.1         | 9.08      | 36.9     | 206           |       |                  |

|                                                                          |       |       |      |      |       |   |
|--------------------------------------------------------------------------|-------|-------|------|------|-------|---|
| NN1C([N+](=O)[O-])=NC([N+](=O)[O-])=NC1=C([N+](=O)[O-])[N+](=O)[O-]      | 1.908 | 146.1 | 9.08 | 36.3 | 155.1 |   |
| NN1N=C([N+](=O)[O-])N2C(N[N+](=O)[O-])=NN([N+](=O)[O-])C2=C1[N+](=O)[O-] | 1.956 | 442.1 | 9.08 | 37.9 | 128   | 1 |
| O=[N+](([O-])c1nc([N+](=O)[O-])c2nnnn2c1[N+](=O)[O-])                    | 1.925 | 573.8 | 9.07 | 39.2 | 253.2 | 1 |
| NNN1C([N+](=O)[O-])=C1[N+](=O)[O-]                                       | 1.89  | 180.6 | 9.07 | 37.7 | 202.7 | 1 |
| Nc1c([N+](=O)[O-])n[n+](=O)[n-]c1[N+](=O)[O-]                            | 1.895 | 136.3 | 9.07 | 38.3 | 196.8 |   |
| O=[N+](([O-])c1nc([N+](=O)[O-])c2nnc([N+](=O)[O-])n2c1[N+](=O)[O-])      | 1.917 | 514.7 | 9.06 | 36.9 | 233.1 | 1 |
| NC1=C([N+](=O)[O-])ON=C([N+](=O)[O-])N1[N+](=O)[O-]                      | 1.923 | 17    | 9.06 | 37.8 | 150.1 | 1 |
| NN=c1[nH]c([N+](=O)[O-])c([N+](=O)[O-])n1N[N+](=O)[O-]                   | 1.892 | 227.5 | 9.04 | 35.3 | 167.1 |   |
| O=[N+](([O-])c1nc2n(c1[N+](=O)[O-])N([N+](=O)[O-])C=NO2)                 | 1.927 | 347.3 | 9.03 | 38.2 | 145.7 | 1 |
| O=[N+](([O-])c1nc2onc([N+](=O)[O-])n2c1[N+](=O)[O-])                     | 1.93  | 403.1 | 9.02 | 38.6 | 224.8 |   |
| Nc1nnn2c([N+](=O)[O-])nn([N+](=O)[O-])c12                                | 1.906 | 560.3 | 9.02 | 37.3 | 222.6 | 1 |
| O=[N+](([O-])c1nn([N+](=O)[O-])c2c([N+](=O)[O-])onc12)                   | 1.913 | 404.2 | 9.02 | 38   | 196.2 | 1 |
| O=[N+](([O-])c1nn([N+](=O)[O-])c2nonc12)                                 | 1.889 | 495.8 | 9.02 | 37.7 | 190.2 | 1 |
| O=[N+](([O-])NN1O[N-]C=C1[N+](=O)[O-])                                   | 1.879 | 200.7 | 9.02 | 36   | 134.5 | 1 |
| NC1=NC(=C([N+](=O)[O-])[N+](=O)[O-])N([N+](=O)[O-])N1                    | 1.877 | 183.1 | 9.01 | 34.8 | 122.7 | 1 |
| Nc1nnn([N+](=O)[O-])c1[N+](=O)[O-]                                       | 1.856 | 213.4 | 9    | 36.8 | 139.5 |   |
| NN1C(=N[N+](=O)[O-])NC([N+](=O)[O-])=NC([N+](=O)[O-])=C1[N+](=O)[O-]     | 1.91  | 184.5 | 9    | 35.7 | 139   | 1 |
| O=[N+](([O-])c1nnc2nnnn2c1[N+](=O)[O-])                                  | 1.891 | 686.6 | 8.99 | 38.8 | 252.9 | 1 |
| O=[N+](([O-])c1nc([N+](=O)[O-])c2nc([N+](=O)[O-])n([N+](=O)[O-])c2n1)    | 1.938 | 447.3 | 8.99 | 37.4 | 196.3 |   |
| Nc1nc([N+](=O)[O-])c([N+](=O)[O-])[n-][n+]1=O                            | 1.885 | 128.9 | 8.98 | 37.8 | 204.9 |   |
| O=[N+](([O-])C1=NC(=C([N+](=O)[O-])[N+](=O)[O-])NN1)                     | 1.898 | 122.6 | 8.98 | 36.2 | 165.5 |   |
| N=c1n(N)c([N+](=O)[O-])c(N[N+](=O)[O-])n1[N+](=O)[O-]                    | 1.867 | 222.6 | 8.98 | 36.2 | 130.7 | 1 |
| O=[N+](([O-])c1nc([N+](=O)[O-])n2nc([N+](=O)[O-])nc2n1)                  | 1.925 | 486.3 | 8.97 | 37.4 | 208.9 |   |
| N=c1[nH]nc(N[N+](=O)[O-])n1[N+](=O)[O-]                                  | 1.897 | 160.5 | 8.97 | 36.6 | 128.2 | 1 |
| Nn1nc([N+](=O)[O-])nc2n(c([N+](=O)[O-])c1[N+](=O)[O-])N=C2[N+](=O)[O-]   | 1.928 | 405.3 | 8.96 | 36.2 | 248.5 | 1 |
| Nc1c([N+](=O)[O-])[nH]n1[N+](=O)[O-]                                     | 1.903 | 40.2  | 8.96 | 35.3 | 247.6 | 1 |
| Nn1nc([N+](=O)[O-])n2nc([N+](=O)[O-])c([N+](=O)[O-])c12                  | 1.899 | 456.1 | 8.95 | 37.1 | 278.5 |   |
| Nn1c(N[N+](=O)[O-])nc([N+](=O)[O-])c1[N+](=O)[O-]                        | 1.861 | 159.9 | 8.95 | 36.2 | 131.5 | 1 |
| O=[N+](([O-])Nc1[nH]c([N+](=O)[O-])nc1[N+](=O)[O-])                      | 1.915 | 122.4 | 8.95 | 37.4 | 130.8 | 1 |
| O=[N+](([O-])c1nn[nH]c1[N+](=O)[O-])                                     | 1.877 | 244.9 | 8.94 | 37   | 272.4 |   |
| O=[N+](([O-])c1nc([N+](=O)[O-])n2ncn2c1[N+](=O)[O-])                     | 1.894 | 392.4 | 8.94 | 36.9 | 235.1 | 1 |
| O=[N+](([O-])c1nc2c([N+](=O)[O-])c([N+](=O)[O-])nc([N+](=O)[O-])n2n1)    | 1.916 | 426.6 | 8.94 | 36.5 | 233.2 |   |

|                                                                                       |       |       |      |      |       |   |
|---------------------------------------------------------------------------------------|-------|-------|------|------|-------|---|
| O=[N+](O)c1nn([N+](=O)[O-])c2c([N+](=O)[O-])n[nH]c12                                  | 1.954 | 398.1 | 8.94 | 37   | 187.8 |   |
| Nn1[nH]c([N+](=O)[O-])nc1=N[N+](=O)[O-]                                               | 1.876 | 197.3 | 8.94 | 36.1 | 173.7 | 1 |
| NN1O[N-]N=C1[N+](=O)[O-]                                                              | 1.821 | 321   | 8.94 | 34.6 | 162.6 | 1 |
| O=[N+](O)c1nc([N+](=O)[O-])c2nnn([N+](=O)[O-])c2n1                                    | 1.887 | 517   | 8.94 | 36.7 | 153.8 | 1 |
| Nc1[n-][n+](=O)oc1[N+](=O)[O-]                                                        | 1.864 | 86    | 8.93 | 37   | 232.7 | 1 |
| O=[N+](O)c1nc2nnnc-2n([N+](=O)[O-])n1                                                 | 1.891 | 617.7 | 8.93 | 36.6 | 204.9 | 1 |
| NN=c1n(N)c([N+](=O)[O-])c(N[N+](=O)[O-])n1[N+](=O)[O-]                                | 1.854 | 309.4 | 8.93 | 36.2 | 121.6 |   |
| Nn1nc([N+](=O)[O-])n2onc2nnc([N+](=O)[O-])c1[N+](=O)[O-]                              | 1.896 | 562.6 | 8.92 | 36.6 | 252.4 | 1 |
| Nc1nc([N+](=O)[O-])nn1[N+](=O)[O-]                                                    | 1.87  | 196.8 | 8.92 | 37   | 238.1 |   |
| NN=c1c2nc([N+](=O)[O-])n([N+](=O)[O-])c2nc([N+](=O)[O-])n1[N+](=O)[O-]                | 1.942 | 463.9 | 8.92 | 37.2 | 177   |   |
| O=[N+](O)C(=C1N=C[N+](O)ON([N+](=O)[O-])N1)[N+](=O)[O-]                               | 1.866 | 132.6 | 8.92 | 35.5 | 127.7 | 1 |
| O=[N+](O)c1nc2onc([N+](=O)[O-])n2n1                                                   | 1.921 | 425.7 | 8.91 | 37   | 229.2 | 1 |
| Nc1nc2n([N+](=O)[O-])nc([N+](=O)[O-])n2c1[N+](=O)[O-]                                 | 1.929 | 413.4 | 8.9  | 37   | 236.9 | 1 |
| O=[N+](O)c1nc([N+](=O)[O-])n2c([N+](=O)[O-])nc([N+](=O)[O-])c2n1                      | 1.908 | 472.8 | 8.9  | 36.4 | 191.5 | 1 |
| NC1=C([N+](=O)[O-])N([N+](=O)[O-])C([N+](=O)[O-])=Nc2nnc([N+](=O)[O-])n21             | 1.935 | 418.2 | 8.89 | 37   | 146.6 | 1 |
| O=[N+](O)C1=Nn2c([N+](=O)[O-])nc([N+](=O)[O-])c21                                     | 1.923 | 422.4 | 8.88 | 37.6 | 215.8 | 1 |
| Nn1nc([N+](=O)[O-])[nH]c1=N[N+](=O)[O-]                                               | 1.88  | 215.7 | 8.88 | 35.3 | 210.6 | 1 |
| NN1NC(=C(N[N+](=O)[O-])[N+](=O)[O-])N=C1[N+](=O)[O-]                                  | 1.868 | 132.2 | 8.88 | 34.3 | 145.9 |   |
| N=c1[nH]c([N+](=O)[O-])c([N+](=O)[O-])n1[N+](=O)[O-]                                  | 1.934 | 14.6  | 8.87 | 37.2 | 240.6 |   |
| N=c1n([N+](=O)[O-])cc([N+](=O)[O-])n1[N+](=O)[O-]                                     | 1.881 | 131.5 | 8.87 | 36.6 | 161.6 |   |
| NN=c1n(C=N[N+](=O)[O-])c([N+](=O)[O-])c([N+](=O)[O-])n1[N+](=O)[O-]                   | 1.856 | 280.3 | 8.87 | 35.8 | 132   |   |
| NN=c1n(N)c([N+](=O)[O-])c([N+](=O)[O-])n1N[N+](=O)[O-]                                | 1.845 | 288.5 | 8.86 | 34.7 | 214.4 |   |
| Nc1[n-][n+](=O)c([N+](=O)[O-])nc1[N+](=O)[O-]                                         | 1.906 | 142.3 | 8.86 | 37.6 | 209.6 |   |
| Nc1[n-][n+](=O)[n-]c1[N+](=O)[O-]                                                     | 1.866 | 249.7 | 8.86 | 36.5 | 203   | 1 |
| O=[N+](O)N=Cc1[n-][n+](=O)c([N+](=O)[O-])nc1[N+](=O)[O-]                              | 1.873 | 257.4 | 8.86 | 37.2 | 128.2 |   |
| NC1=NNC([N+](=O)[O-])=NN1C(=NC(=C([N+](=O)[O-])[N+](=O)[O-])[N+](=O)[O-])[N+](=O)[O-] | 1.892 | 244.7 | 8.85 | 34.5 | 207.1 | 1 |
| N=c1[nH]c([N+](=O)[O-])c([N+](=O)[O-])n1N[N+](=O)[O-]                                 | 1.906 | 65.4  | 8.85 | 35.1 | 132.1 |   |
| Nn1nc([N+](=O)[O-])n2nc([N+](=O)[O-])nc12                                             | 1.884 | 514.6 | 8.84 | 35.9 | 277.4 |   |
| Nc1nnc([N+](=O)[O-])n2c([N+](=O)[O-])nn([N+](=O)[O-])c3nnc1n3-2                       | 1.941 | 795.3 | 8.84 | 37.1 | 237.5 | 1 |
| Nc1nc([N+](=O)[O-])c([N+](=O)[O-])c([N+](=O)[O-])n1                                   | 1.875 | 124.9 | 8.84 | 36.6 | 204.9 | 1 |
| Nn1nc([N+](=O)[O-])n2c(N[N+](=O)[O-])nn([N+](=O)[O-])c3nnc1n3-2                       | 1.913 | 770.6 | 8.84 | 37   | 152.8 |   |



|                                                                                      |       |       |      |      |       |   |
|--------------------------------------------------------------------------------------|-------|-------|------|------|-------|---|
| NN=c1n(N)c([N+](=O)[O-])c([N+](=O)[O-])n1[N+](=O)[O-]                                | 1.861 | 219.3 | 8.83 | 36.1 | 232.3 |   |
| O=[N+](O-)C1=NC([N+](=O)[O-])=NC(=C([N+](=O)[O-])[N+](=O)[O-])C([N+](=O)[O-])=N1     | 1.882 | 83.3  | 8.83 | 34.8 | 165.1 | 1 |
| NC1=C([N+](=O)[O-])C([N+](=O)[O-])=Nc2c([N+](=O)[O-])nnn2N1[N+](=O)[O-]              | 1.901 | 408.3 | 8.83 | 35.7 | 146.8 | 1 |
| Nc1noc([N+](=O)[O-])nc1=N[N+](=O)[O-]                                                | 1.871 | 125.3 | 8.83 | 34.8 | 130.8 | 1 |
| Nc1nc([N+](=O)[O-])c2c([N+](=O)[O-])nnn2c1[N+](=O)[O-]                               | 1.919 | 452.9 | 8.82 | 36.1 | 247.3 | 1 |
| N=c1n(N)c([N+](=O)[O-])c([N+](=O)[O-])n1N[N+](=O)[O-]                                | 1.855 | 172.6 | 8.82 | 34.7 | 170.6 |   |
| N=c1c2nc([N+](=O)[O-])n([N+](=O)[O-])c2nc([N+](=O)[O-])n1[N+](=O)[O-]                | 1.94  | 358.9 | 8.81 | 36.8 | 195.5 |   |
| NC1=Nc2c([N+](=O)[O-])nn([N+](=O)[O-])c2N=C([N+](=O)[O-])N1[N+](=O)[O-]              | 1.928 | 388.4 | 8.81 | 35.3 | 155.9 | 1 |
| NC1=C(N[N+](=O)[O-])C(=C(N[N+](=O)[O-])[N+](=O)[O-])N=C([N+](=O)[O-])N1N[N+](=O)[O-] | 1.869 | 144.7 | 8.81 | 33.3 | 121.3 | 1 |
| Nc1c2nc([N+](=O)[O-])n([N+](=O)[O-])c2nn1[N+](=O)[O-]                                | 1.924 | 374.1 | 8.8  | 35.9 | 203.9 | 1 |
| O=[N+](O-)C1=Nc2c([N+](=O)[O-])nn([N+](=O)[O-])c21                                   | 1.891 | 357.9 | 8.8  | 35.9 | 153.1 | 1 |
| O=[N+](O-)N=Cc1c([N+](=O)[O-])c([N+](=O)[O-])c([N+](=O)[O-])n1[N+](=O)[O-]           | 1.856 | 189.6 | 8.8  | 36.2 | 145.5 | 1 |
| O=[N+](O-)c1nn[nH]c2nc([N+](=O)[O-])c([N+](=O)[O-])c1-2                              | 1.94  | 389.7 | 8.79 | 35.1 | 225.6 | 1 |
| O=[N+](O-)c1nn([N+](=O)[O-])c2nn[nH]c12                                              | 1.92  | 528.5 | 8.79 | 36.1 | 214.5 | 1 |
| NC1=NC(=C([N+](=O)[O-])[N+](=O)[O-])NN1[N+](=O)[O-]                                  | 1.868 | 195.7 | 8.79 | 33.9 | 144.8 | 1 |
| Nn1c([N+](=O)[O-])c([N+](=O)[O-])n(C=N[N+](=O)[O-])c1=N[N+](=O)[O-]                  | 1.845 | 211.3 | 8.79 | 34.8 | 136.2 |   |
| Nc1nnc2n(N[N+](=O)[O-])c([N+](=O)[O-])nn12                                           | 1.884 | 512   | 8.79 | 36.3 | 130.5 | 1 |
| O=[N+](O-)N=CC(=C1N=C([N+](=O)[O-])N(C=N[N+](=O)[O-])N1[N+](=O)[O-])[N+](=O)[O-]     | 1.853 | 269.4 | 8.79 | 33.3 | 121.1 | 1 |
| N=c1n([N+](=O)[O-])nc([N+](=O)[O-])n1N                                               | 1.864 | 193.9 | 8.78 | 35.5 | 254.3 | 1 |
| NN1N=C([N+](=O)[O-])n2nc([N+](=O)[O-])c3nnc1n32                                      | 1.886 | 755.9 | 8.78 | 36.1 | 172.1 | 1 |
| Nn1cc([N+](=O)[O-])n(N[N+](=O)[O-])c1=NN[N+](=O)[O-]                                 | 1.823 | 274.7 | 8.78 | 33.8 | 159.6 |   |
| Nn1c([N+](=O)[O-])nc2c1nc([N+](=O)[O-])n2[N+](=O)[O-]                                | 1.904 | 402.9 | 8.77 | 35.6 | 249.3 | 1 |
| O=[N+](O-)c1nn2c([N+](=O)[O-])nc([N+](=O)[O-])c([N+](=O)[O-])c2c2nnnc1-2             | 1.946 | 620.1 | 8.77 | 35.5 | 246.6 | 1 |
| O=[N+](O-)N=c1c2nc([N+](=O)[O-])[nH]c2nc([N+](=O)[O-])n1[N+](=O)[O-]                 | 1.938 | 364.9 | 8.77 | 36.3 | 131.9 |   |
| NN1N=C([N+](=O)[O-])c2c(nc([N+](=O)[O-])nc2[N+](=O)[O-])O1                           | 1.916 | 360.7 | 8.77 | 35.3 | 122   | 1 |
| Nc1c([N+](=O)[O-])nc([N+](=O)[O-])c2nnc([N+](=O)[O-])n12                             | 1.918 | 427   | 8.76 | 36.2 | 236.7 | 1 |
| Nc1nc2n([N+](=O)[O-])nc([N+](=O)[O-])n2n1                                            | 1.891 | 452   | 8.76 | 36.6 | 205   |   |
| Nn1c(N[N+](=O)[O-])nnc2c([N+](=O)[O-])nc([N+](=O)[O-])c1-2                           | 1.929 | 398   | 8.76 | 34.9 | 157.3 | 1 |
| N=c1n(NC=N[N+](=O)[O-])c([N+](=O)[O-])c([N+](=O)[O-])                                | 1.84  | 200.3 | 8.76 | 35   | 150.4 | 1 |

|                                                                                        |       |       |      |      |       |   |
|----------------------------------------------------------------------------------------|-------|-------|------|------|-------|---|
| )]n1[N+](=O)[O-]                                                                       |       |       |      |      |       |   |
| O=[N+](([O-])NN1C([N+](=O)[O-])=NC=NC1=C([N+](=O)[O-])[N+](=O)[O-])                    | 1.846 | 224   | 8.76 | 33.2 | 128.7 | 1 |
| NN=c1c2nc([N+](=O)[O-])nc([N+](=O)[O-])c2nc([N+](=O)[O-])n1[N+](=O)[O-]                | 1.936 | 465.4 | 8.75 | 35.4 | 171.4 |   |
| N[N+](([O-])N=CN=c1[nH]nnn1[N+](=O)[O-])                                               | 1.825 | 474.5 | 8.75 | 33.4 | 149.3 | 1 |
| O=[N+](([O-])c1nc2n([N+](=O)[O-])ncn2c1[N+](=O)[O-])                                   | 1.879 | 422.1 | 8.74 | 35.3 | 227.5 | 1 |
| NN1N=C([N+](=O)[O-])c2nnn([N+](=O)[O-])c2N=C1[N+](=O)[O-]                              | 1.863 | 563.6 | 8.74 | 34.8 | 133.7 | 1 |
| O=[N+](([O-])c1cnc([N+](=O)[O-])[n+](=O)[n-]1                                          | 1.867 | 148.4 | 8.73 | 35   | 169.3 |   |
| Nc1nc([N+](=O)[O-])c([N+](=O)[O-])c(=N[N+](=O)[O-])n1N                                 | 1.857 | 144.4 | 8.73 | 34   | 150.6 |   |
| N=c1n(C=N[N+](=O)[O-])c([N+](=O)[O-])c([N+](=O)[O-])n1[N+](=O)[O-]                     | 1.866 | 195.3 | 8.73 | 36.2 | 137.6 |   |
| O=[N+](([O-])c1nc2n(n1)c1nnc([N+](=O)[O-])n12                                          | 1.893 | 695.5 | 8.72 | 34.3 | 260.1 | 1 |
| O=[N+](([O-])c1nc([N+](=O)[O-])c2nncn2c1[N+](=O)[O-])                                  | 1.889 | 465   | 8.72 | 34.3 | 259.3 | 1 |
| Nc1c([N+](=O)[O-])n[nH]c(=NN[N+](=O)[O-])c1[N+](=O)[O-]                                | 1.892 | 218.7 | 8.72 | 34.8 | 200.6 | 1 |
| Nc1nc([N+](=O)[O-])nc2c1c([N+](=O)[O-])nn2[N+](=O)[O-]                                 | 1.911 | 395.8 | 8.72 | 34.5 | 198.6 |   |
| NNC(=C1N=NN=C1[N+](=O)[O-])[N+](=O)[O-]                                                | 1.838 | 319.4 | 8.72 | 33.8 | 177.3 | 1 |
| NC1=NN(N)C([N+](=O)[O-])N(N)C([N+](=O)[O-])=C([N+](=O)[O-])N1[N+](=O)[O-]              | 1.88  | 116.2 | 8.72 | 35.6 | 133.1 | 1 |
| O=[N+](([O-])N=Cn1c([N+](=O)[O-])nc2c(nc([N+](=O)[O-])n2[N+](=O)[O-])c1=N[N+](=O)[O-]) | 1.91  | 547.3 | 8.72 | 35.4 | 127.2 | 1 |
| Nc1nc([N+](=O)[O-])c2nc([N+](=O)[O-])nn2c1[N+](=O)[O-]                                 | 1.934 | 392.4 | 8.71 | 35.9 | 256.2 | 1 |
| N=c1[nH]nnn1[N+](=O)[O-]                                                               | 1.89  | 277.7 | 8.71 | 33.8 | 243.3 |   |
| O=[N+](([O-])c1nn2enn([N+](=O)[O-])c2c1[N+](=O)[O-])                                   | 1.853 | 410.6 | 8.71 | 35.6 | 190.4 |   |
| Nn1c([N+](=O)[O-])c(N[N+](=O)[O-])[nH]c1=NN[N+](=O)[O-]                                | 1.852 | 228   | 8.71 | 34.6 | 144.8 |   |
| O=[N+](([O-])C1=NC(=C([N+](=O)[O-])[N+](=O)[O-])N1                                     | 1.881 | 90.3  | 8.7  | 34.3 | 202.8 | 1 |
| O=[N+](([O-])N=CN1C([N+](=O)[O-])=NC1=C([N+](=O)[O-])[N+](=O)[O-])                     | 1.854 | 164.7 | 8.7  | 33.7 | 141.2 | 1 |
| Nn1nc([N+](=O)[O-])nc2c([N+](=O)[O-])nc([N+](=O)[O-])c-2c1=NN[N+](=O)[O-]              | 1.898 | 491.8 | 8.69 | 34.1 | 193.6 | 1 |
| Nn1nc([N+](=O)[O-])n2onc([N+](=O)[O-])c3nnc1n3-2                                       | 1.88  | 720.1 | 8.68 | 34.7 | 251.3 | 1 |
| O=[N+](([O-])c1nc2n([N+](=O)[O-])ncn2n1                                                | 1.861 | 432.9 | 8.68 | 34.9 | 170.1 |   |
| NN=c1c2nc([N+](=O)[O-])n(N[N+](=O)[O-])c2c([N+](=O)[O-])c([N+](=O)[O-])n1N[N+](=O)[O-] | 1.885 | 485.2 | 8.68 | 33.6 | 155.3 | 1 |
| NC(N)=C1N=C([N+](=O)[O-])N=C([N+](=O)[O-])N1[N+](=O)[O-]                               | 1.88  | 72.7  | 8.68 | 34.2 | 132.8 | 1 |
| NC1=Nc2nnn([N+](=O)[O-])c2N=C([N+](=O)[O-])N1[N+](=O)[O-]                              | 1.887 | 444.9 | 8.68 | 34.2 | 122.2 | 1 |
| Nc1nnnn1[N+](=O)[O-]                                                                   | 1.819 | 384.1 | 8.67 | 34.4 | 227.5 |   |
| Nc1nn2n3c(mnc13)N([N+](=O)[O-])N=C2[N+](=O)[O-]                                        | 1.901 | 726.7 | 8.67 | 34.5 | 175.8 | 1 |

|                                                                                         |       |       |      |      |       |   |
|-----------------------------------------------------------------------------------------|-------|-------|------|------|-------|---|
| Nc1nn([N+](=O)[O-])c2c(N[N+](=O)[O-])nnc-2c1[N+](=O)[O-]                                | 1.921 | 436.6 | 8.67 | 33.7 | 139.5 | 1 |
| Nc1nc([N+](=O)[O-])c2nnnn2c1[N+](=O)[O-]                                                | 1.897 | 529.7 | 8.66 | 36   | 285.2 | 1 |
| NC1=C([N+](=O)[O-])OO[N+](=O)[N-]1                                                      | 1.894 | 37.3  | 8.66 | 34.2 | 237.6 | 1 |
| Nc1nnc([N+](=O)[O-])n(N)c1=N[N+](=O)[O-]                                                | 1.841 | 273.7 | 8.66 | 33.2 | 172.9 | 1 |
| O=[N+](([O-])N=Cc1c([N+](=O)[O-])nc2n([N+](=O)[O-])nc([N+](=O)[O-])n12                  | 1.873 | 558.7 | 8.66 | 35   | 155.6 | 1 |
| NC1=C([N+](=O)[O-])C([N+](=O)[O-])=C(N[N+](=O)[O-])NN1                                  | 1.886 | 160.7 | 8.66 | 34.9 | 138.6 | 1 |
| Nn1c([N+](=O)[O-])c([N+](=O)[O-])nc(C=N[N+](=O)[O-])c1=N[N+](=O)[O-]                    | 1.835 | 204.9 | 8.66 | 33.2 | 125.8 | 1 |
| O=[N+](([O-])c1nc2[nH]c([N+](=O)[O-])nc([N+](=O)[O-])c-2n1                              | 1.949 | 324.6 | 8.65 | 34.5 | 233.6 |   |
| O=[N+](([O-])N=Cn1nc([N+](=O)[O-])[nH]1                                                 | 1.833 | 226.4 | 8.65 | 33.9 | 150.5 | 1 |
| Nc1c([N+](=O)[O-])c([N+](=O)[O-])nc2nnc([N+](=O)[O-])n12                                | 1.906 | 392.8 | 8.64 | 35.4 | 224   |   |
| NN1C([N+](=O)[O-])=CC(=C([N+](=O)[O-])[N+](=O)[O-])N=C1[N+](=O)[O-]                     | 1.847 | 99.4  | 8.64 | 32.7 | 183   | 1 |
| Nc1c(N[N+](=O)[O-])nc([N+](=O)[O-])c2nnc([N+](=O)[O-])n12                               | 1.907 | 411.6 | 8.64 | 34.8 | 132.3 | 1 |
| Nc1nnc([N+](=O)[O-])nc1[N+](=O)[O-]                                                     | 1.865 | 223.9 | 8.63 | 35.2 | 236.4 |   |
| O=[N+](([O-])NN=c1[nH]c([N+](=O)[O-])cnc1[N+](=O)[O-])                                  | 1.868 | 159.1 | 8.63 | 32.7 | 178.4 | 1 |
| Nc1nc([N+](=O)[O-])c2nnnc-2c([N+](=O)[O-])c1[N+](=O)[O-]                                | 1.921 | 497.6 | 8.62 | 34.1 | 269.1 | 1 |
| Nc1nc([N+](=O)[O-])c2n(nc([N+](=O)[O-])n1C=N[N+](=O)[O-])C([N+](=O)[O-])=N2             | 1.926 | 494.1 | 8.62 | 33.4 | 201.5 | 1 |
| O=[N+](([O-])N=Cc1c([N+](=O)[O-])nc([N+](=O)[O-])n1[nH]c1=N[N+](=O)[O-])                | 1.867 | 156   | 8.62 | 33.7 | 124.2 |   |
| Nc1c([N+](=O)[O-])c([N+](=O)[O-])nc2c([N+](=O)[O-])nc([N+](=O)[O-])n12                  | 1.909 | 292.7 | 8.61 | 35.4 | 218.9 | 1 |
| Nc1c([N+](=O)[O-])[n-]oc1=NN[N+](=O)[O-]                                                | 1.832 | 205.2 | 8.61 | 34   | 154.4 | 1 |
| N=c1c2nc([N+](=O)[O-])n(N[N+](=O)[O-])c2nc([N+](=O)[O-])n1[N+](=O)[O-]                  | 1.915 | 368.1 | 8.61 | 34.5 | 145.2 |   |
| O=[N+](([O-])N=Cc1c([N+](=O)[O-])noc1[N+](=O)[O-])                                      | 1.816 | 220.2 | 8.61 | 33.5 | 139.3 | 1 |
| O=[N+](([O-])N=Cn1[nH]c([N+](=O)[O-])c1N=C([N+](=O)[O-])[N+](=O)[O-])                   | 1.835 | 196.1 | 8.61 | 33.3 | 137.4 | 1 |
| O=[N+](([O-])C=C1NN=NN1[N+](=O)[O-])                                                    | 1.833 | 318.9 | 8.61 | 33.1 | 125.2 | 1 |
| Nc1nc([N+](=O)[O-])n([N+](=O)[O-])c2nc([N+](=O)[O-])nc1-2                               | 1.935 | 324.3 | 8.6  | 34.6 | 222.8 |   |
| O=[N+](([O-])c1cc([N+](=O)[O-])nc([N+](=O)[O-])n1                                       | 1.847 | 154.5 | 8.6  | 34.7 | 196   | 1 |
| NC1=NN(C=N[N+](=O)[O-])N2NN=C([N+](=O)[O-])N12                                          | 1.893 | 491.5 | 8.6  | 32.9 | 168.9 | 1 |
| NN1C([N+](=O)[O-])=NC=NC1=C([N+](=O)[O-])n1[N+](=O)[O-]                                 | 1.807 | 194   | 8.6  | 31.9 | 146.1 |   |
| NC1=NC(C=N[N+](=O)[O-])=C([N+](=O)[O-])N=C([N+](=O)[O-])N1[N+](=O)[O-]                  | 1.863 | 163.8 | 8.6  | 32.6 | 125.8 | 1 |
| N=C1N(C=N[N+](=O)[O-])C(C=N[N+](=O)[O-])=C([N+](=O)[O-])N=C([N+](=O)[O-])N1[N+](=O)[O-] | 1.848 | 252.6 | 8.6  | 31.7 | 125.5 | 1 |

|                                                                                                                                                                                                                                                                                                       |       |       |      |      |       |   |
|-------------------------------------------------------------------------------------------------------------------------------------------------------------------------------------------------------------------------------------------------------------------------------------------------------|-------|-------|------|------|-------|---|
| $\text{NN}=\text{c}1\text{n}(\text{N}[\text{N}^+](=\text{O})[\text{O}^-])\text{c}(\text{N}[\text{N}^+](=\text{O})[\text{O}^-])\text{c}(\text{C}=\text{N}[\text{N}^+](=\text{O})[\text{O}^-])\text{c}2\text{nnnn}12$                                                                                   | 1.87  | 665.8 | 8.6  | 32.4 | 125.3 | 1 |
| $\text{Nc}1\text{nn}2\text{c}(\text{N}[\text{N}^+](=\text{O})[\text{O}^-])\text{n}[\text{nH}]c3\text{c}(\text{n}2\text{n}1[\text{N}^+](=\text{O})[\text{O}^-])=\text{NN}3$                                                                                                                            | 1.964 | 653.3 | 8.59 | 35.6 | 305   | 1 |
| $\text{Nc}1\text{c}(\text{N}[\text{N}^+](=\text{O})[\text{O}^-])\text{nn}c2\text{c}(\text{N}[\text{N}^+](=\text{O})[\text{O}^-])\text{nc}(\text{N}[\text{N}^+](=\text{O})[\text{O}^-])\text{c}2\text{c}1[\text{N}^+](=\text{O})[\text{O}^-]$                                                          | 1.949 | 357.6 | 8.59 | 33.7 | 251.7 | 1 |
| $\text{NC}1=\text{NC}(=\text{C}(\text{N}[\text{N}^+](=\text{O})[\text{O}^-])[\text{N}^+](=\text{O})[\text{O}^-])\text{N}(\text{N})\text{N}1$                                                                                                                                                          | 1.821 | 184.5 | 8.59 | 31.5 | 185.5 |   |
| $\text{O}=[\text{N}^+](\text{O}^-)\text{N}=\text{Cc}1\text{c}(\text{N}[\text{N}^+](=\text{O})[\text{O}^-])\text{nc}(\text{N}[\text{N}^+](=\text{O})[\text{O}^-])\text{c}2\text{nn}c(\text{N}[\text{N}^+](=\text{O})[\text{O}^-])\text{n}12$                                                           | 1.902 | 565.3 | 8.59 | 34.2 | 183.8 | 1 |
| $\text{Nc}1\text{nc}(\text{N}[\text{N}^+](=\text{O})[\text{O}^-])\text{c}2\text{c}(\text{N}[\text{N}^+](=\text{O})[\text{O}^-])\text{nn}(\text{N}[\text{N}^+](=\text{O})[\text{O}^-])\text{c}2\text{n}1$                                                                                              | 1.903 | 373.4 | 8.59 | 34.3 | 155.6 |   |
| $\text{Nn}1\text{c}(\text{N}[\text{N}^+](=\text{O})[\text{O}^-])\text{nc}(\text{C}=\text{N}[\text{N}^+](=\text{O})[\text{O}^-])\text{c}(\text{N}[\text{N}^+](=\text{O})[\text{O}^-])\text{c}1=\text{N}[\text{N}^+](=\text{O})[\text{O}^-]$                                                            | 1.828 | 291.5 | 8.59 | 33   | 146.3 | 1 |
| $\text{Nc}1\text{nc}(\text{N}[\text{N}^+](=\text{O})[\text{O}^-])\text{oc}1[\text{N}^+](=\text{O})[\text{O}^-]$                                                                                                                                                                                       | 1.869 | -27.9 | 8.58 | 34.1 | 276   | 1 |
| $\text{O}=[\text{N}^+](\text{O}^-)\text{c}1\text{nc}2\text{cnnn}2\text{c}(\text{N}[\text{N}^+](=\text{O})[\text{O}^-])\text{c}1[\text{N}^+](=\text{O})[\text{O}^-]$                                                                                                                                   | 1.858 | 439.7 | 8.58 | 33.5 | 237.2 | 1 |
| $\text{NC}1=\text{NN}(\text{N}[\text{N}^+](=\text{O})[\text{O}^-])\text{C}(\text{N})=\text{NN}1[\text{N}^+](=\text{O})[\text{O}^-]$                                                                                                                                                                   | 1.872 | 193.9 | 8.58 | 34.7 | 158.4 | 1 |
| $\text{NN}1\text{C}=\text{NC}(\text{N}[\text{N}^+](=\text{O})[\text{O}^-])=\text{NC}(=\text{C}(\text{N}[\text{N}^+](=\text{O})[\text{O}^-])[\text{N}^+](=\text{O})[\text{O}^-])\text{N}1$                                                                                                             | 1.812 | 179.6 | 8.58 | 31.2 | 157.5 | 1 |
| $\text{NC}1=\text{C}(\text{N}[\text{N}^+](=\text{O})[\text{O}^-])\text{N}=\text{C}(\text{N}[\text{N}^+](=\text{O})[\text{O}^-])\text{N}2\text{C}(\text{N}[\text{N}^+](=\text{O})[\text{O}^-])=\text{NC}(\text{N}[\text{N}^+](=\text{O})[\text{O}^-])=\text{NN}12$                                     | 1.927 | 341.3 | 8.58 | 34   | 146.6 | 1 |
| $\text{NC}(\text{C}=\text{N}[\text{N}^+](=\text{O})[\text{O}^-])=\text{C}1\text{N}=\text{C}(\text{N}[\text{N}^+](=\text{O})[\text{O}^-])\text{N}=\text{C}(\text{N}[\text{N}^+](=\text{O})[\text{O}^-])\text{N}1[\text{N}^+](=\text{O})[\text{O}^-]$                                                   | 1.835 | 246.7 | 8.58 | 31.7 | 124   | 1 |
| $\text{NC}1=\text{C}(\text{N}[\text{N}^+](=\text{O})[\text{O}^-])\text{N}(\text{N})\text{NC}(\text{N}[\text{N}^+](=\text{O})[\text{O}^-])=\text{C}1[\text{N}^+](=\text{O})[\text{O}^-]$                                                                                                               | 1.869 | 156.1 | 8.58 | 34.3 | 123   | 1 |
| $\text{NN}1\text{N}=\text{C}1\text{N}[\text{N}^+](=\text{O})[\text{O}^-]$                                                                                                                                                                                                                             | 1.779 | 339.6 | 8.58 | 31.8 | 121.2 | 1 |
| $\text{Nn}1\text{nc}(\text{N}[\text{N}^+](=\text{O})[\text{O}^-])\text{nc}2\text{c}(\text{N}[\text{N}^+](=\text{O})[\text{O}^-])\text{nn}c1-2$                                                                                                                                                        | 1.87  | 484.1 | 8.57 | 33.4 | 274.5 | 1 |
| $\text{Nn}1\text{nc}(\text{N}[\text{N}^+](=\text{O})[\text{O}^-])\text{o}1$                                                                                                                                                                                                                           | 1.799 | 128.4 | 8.57 | 32.6 | 232.5 | 1 |
| $\text{NC}1\text{NC}(\text{N}[\text{N}^+](=\text{O})[\text{O}^-])=\text{NC}(=\text{C}(\text{N}[\text{N}^+](=\text{O})[\text{O}^-])[\text{N}^+](=\text{O})[\text{O}^-])\text{N}1$                                                                                                                      | 1.839 | 25.8  | 8.57 | 32.4 | 214.5 | 1 |
| $\text{Nc}1\text{nc}(\text{N}[\text{N}^+](=\text{O})[\text{O}^-])\text{c}(\text{N}[\text{N}^+](=\text{O})[\text{O}^-])\text{c}2\text{c}1\text{nnn}2[\text{N}^+](=\text{O})[\text{O}^-]$                                                                                                               | 1.889 | 363.6 | 8.57 | 34   | 191.5 |   |
| $\text{NC}1=\text{NC}(\text{N}[\text{N}^+](=\text{O})[\text{O}^-])=\text{C}(\text{N}[\text{N}^+](=\text{O})[\text{O}^-])\text{C}(\text{N}[\text{N}^+](=\text{O})[\text{O}^-])=\text{Nc}2\text{c}1\text{nnn}2\text{N}[\text{N}^+](=\text{O})[\text{O}^-]$                                              | 1.879 | 420.2 | 8.57 | 33.1 | 140.8 | 1 |
| $\text{O}=[\text{N}^+](\text{O}^-)\text{c}1\text{cc}(\text{N}[\text{N}^+](=\text{O})[\text{O}^-])\text{n}2\text{c}(\text{N}[\text{N}^+](=\text{O})[\text{O}^-])\text{nc}(\text{N}[\text{N}^+](=\text{O})[\text{O}^-])\text{c}2\text{n}1$                                                              | 1.887 | 356.9 | 8.56 | 33.6 | 220.8 | 1 |
| $\text{Nc}1\text{c}(\text{N}[\text{N}^+](=\text{O})[\text{O}^-])\text{nn}c2\text{c}1\text{nc}(\text{N}[\text{N}^+](=\text{O})[\text{O}^-])\text{n}2[\text{N}^+](=\text{O})[\text{O}^-]$                                                                                                               | 1.91  | 403.1 | 8.56 | 34   | 214.6 | 1 |
| $\text{Nn}1\text{c}(\text{N}[\text{N}^+](=\text{O})[\text{O}^-])\text{nc}2\text{c}1\text{nnn}2\text{N}[\text{N}^+](=\text{O})[\text{O}^-]$                                                                                                                                                            | 1.837 | 543.2 | 8.56 | 34.2 | 183.7 | 1 |
| $\text{NC}1=\text{NNC}(=\text{C}(\text{N}[\text{N}^+](=\text{O})[\text{O}^-])[\text{N}^+](=\text{O})[\text{O}^-])\text{N}(\text{N})\text{N}1$                                                                                                                                                         | 1.836 | 280.3 | 8.56 | 32.6 | 168.8 | 1 |
| $\text{O}=[\text{N}^+](\text{O}^-)\text{NN}=\text{c}1\text{o}[\text{nH}]c2\text{c}(\text{N}[\text{N}^+](=\text{O})[\text{O}^-])\text{nc}(\text{N}[\text{N}^+](=\text{O})[\text{O}^-])\text{nc}12$                                                                                                     | 1.938 | 269   | 8.56 | 34.8 | 158.1 | 1 |
| $\text{NN}1\text{C}(\text{N}[\text{N}^+](=\text{O})[\text{O}^-])=\text{NC}=\text{NC}1=\text{C}(\text{N}[\text{N}^+](=\text{O})[\text{O}^-])[\text{N}^+](=\text{O})[\text{O}^-]$                                                                                                                       | 1.819 | 144.5 | 8.56 | 30.6 | 130.8 |   |
| $\text{O}=[\text{N}^+](\text{O}^-)\text{N}=\text{CC}(\text{C}=\text{N}[\text{N}^+](=\text{O})[\text{O}^-])=\text{C}1\text{N}=\text{C}(\text{N}[\text{N}^+](=\text{O})[\text{O}^-])\text{N}=\text{C}(\text{N}[\text{N}^+](=\text{O})[\text{O}^-])\text{N}1\text{N}[\text{N}^+](=\text{O})[\text{O}^-]$ | 1.829 | 325.2 | 8.56 | 31   | 129.3 | 1 |
| $\text{Nn}1\text{c}(\text{N}[\text{N}^+](=\text{O})[\text{O}^-])\text{c}(\text{N}[\text{N}^+](=\text{O})[\text{O}^-])\text{c}2\text{c}1\text{nc}(\text{N}[\text{N}^+](=\text{O})[\text{O}^-])\text{n}2\text{N}[\text{N}^+](=\text{O})[\text{O}^-]$                                                    | 1.894 | 307.1 | 8.56 | 34.5 | 120.9 | 1 |

|                                                                                                                                                                                                                                                                                                                                                                            |       |       |      |      |       |   |
|----------------------------------------------------------------------------------------------------------------------------------------------------------------------------------------------------------------------------------------------------------------------------------------------------------------------------------------------------------------------------|-------|-------|------|------|-------|---|
| $\text{NN}=\text{c}1\text{c}(\text{=N}[\text{N}^+](\text{=O})[\text{O}^-])[\text{nH}]\text{c}([\text{N}^+](\text{=O})[\text{O}^-])\text{c}([\text{N}^+](\text{=O})[\text{O}^-])\text{n}1\text{N}$                                                                                                                                                                          | 1.881 | 180.7 | 8.55 | 33.2 | 242.1 | 1 |
| $\text{Nc}1\text{c}2\text{nc}([\text{N}^+](\text{=O})[\text{O}^-])\text{c}([\text{N}^+](\text{=O})[\text{O}^-])\text{nc}([\text{N}^+](\text{=O})[\text{O}^-])\text{c}2\text{nc}1[\text{N}^+](\text{=O})[\text{O}^-]$                                                                                                                                                       | 1.94  | 256.1 | 8.55 | 34.1 | 231.3 | 1 |
| $\text{Nn}1\text{nc}(\text{C}=\text{N}[\text{N}^+](\text{=O})[\text{O}^-])\text{c}([\text{N}^+](\text{=O})[\text{O}^-])\text{c}1[\text{N}^+](\text{=O})[\text{O}^-]$                                                                                                                                                                                                       | 1.797 | 234.9 | 8.55 | 32.4 | 214.9 | 1 |
| $\text{NC}1=\text{Nc}2\text{c}(\text{nc}([\text{N}^+](\text{=O})[\text{O}^-])\text{n}2[\text{N}^+](\text{=O})[\text{O}^-])\text{C}([\text{N}^+](\text{=O})[\text{O}^-])=\text{NN}(\text{N})\text{C}1=\text{N}[\text{N}^+](\text{=O})[\text{O}^-]$                                                                                                                          | 1.898 | 481.1 | 8.55 | 32   | 138.1 | 1 |
| $\text{N}=\text{c}1\text{c}(\text{C}=\text{N}[\text{N}^+](\text{=O})[\text{O}^-])\text{c}([\text{N}^+](\text{=O})[\text{O}^-])\text{nc}([\text{N}^+](\text{=O})[\text{O}^-])\text{n}1[\text{N}^+](\text{=O})[\text{O}^-]$                                                                                                                                                  | 1.856 | 178.4 | 8.55 | 34   | 131.7 |   |
| $\text{N}=\text{c}1\text{oc}(\text{C}=\text{N}[\text{N}^+](\text{=O})[\text{O}^-])\text{c}([\text{N}^+](\text{=O})[\text{O}^-])\text{n}1[\text{N}^+](\text{=O})[\text{O}^-]$                                                                                                                                                                                               | 1.855 | 36.3  | 8.55 | 33.3 | 129.6 | 1 |
| $\text{NC}1=\text{NC}(\text{=C}([\text{N}^+](\text{=O})[\text{O}^-])[\text{N}^+](\text{=O})[\text{O}^-])\text{NNC}1[\text{N}^+](\text{=O})[\text{O}^-]$                                                                                                                                                                                                                    | 1.843 | 117.8 | 8.55 | 32.5 | 129.5 | 1 |
| $\text{Nc}1\text{c}(\text{N}[\text{N}^+](\text{=O})[\text{O}^-])\text{nc}([\text{N}^+](\text{=O})[\text{O}^-])\text{c}2\text{nc}([\text{N}^+](\text{=O})[\text{O}^-])\text{n}12$                                                                                                                                                                                           | 1.913 | 344.7 | 8.55 | 34.4 | 123.5 | 1 |
| $\text{NN}1\text{C}(\text{C}=\text{N}[\text{N}^+](\text{=O})[\text{O}^-])=\text{C}([\text{N}^+](\text{=O})[\text{O}^-])\text{N}=\text{C}([\text{N}^+](\text{=O})[\text{O}^-])\text{N}1\text{C}=\text{N}[\text{N}^+](\text{=O})[\text{O}^-]$                                                                                                                                | 1.818 | 212.1 | 8.55 | 31.5 | 123.3 | 1 |
| $\text{O}=[\text{N}^+](\text{O}^-)\text{N}=\text{CC}1=\text{C}([\text{N}^+](\text{=O})[\text{O}^-])\text{N}=\text{C}([\text{N}^+](\text{=O})[\text{O}^-])\text{N}[\text{N}^+](\text{=O})[\text{O}^-]1$                                                                                                                                                                     | 1.847 | 252.5 | 8.55 | 33.7 | 120.2 | 1 |
| $\text{Nc}1\text{nc}([\text{N}^+](\text{=O})[\text{O}^-])\text{n}2\text{nc}([\text{N}^+](\text{=O})[\text{O}^-])\text{nc}2\text{n}1$                                                                                                                                                                                                                                       | 1.9   | 419.9 | 8.54 | 34.2 | 238.1 |   |
| $\text{Nc}1\text{nc}2\text{c}([\text{N}^+](\text{=O})[\text{O}^-])\text{c}([\text{N}^+](\text{=O})[\text{O}^-])\text{nc}([\text{N}^+](\text{=O})[\text{O}^-])\text{n}2\text{n}1$                                                                                                                                                                                           | 1.901 | 318.3 | 8.54 | 35.2 | 231   |   |
| $\text{Nc}1\text{nc}([\text{N}^+](\text{=O})[\text{O}^-])\text{c}2\text{nnn}([\text{N}^+](\text{=O})[\text{O}^-])\text{c}2\text{c}1[\text{N}^+](\text{=O})[\text{O}^-]$                                                                                                                                                                                                    | 1.89  | 380.1 | 8.54 | 33.8 | 224.6 |   |
| $\text{NC}(\text{C}=\text{N}[\text{N}^+](\text{=O})[\text{O}^-])=\text{C}1\text{N}=\text{C}([\text{N}^+](\text{=O})[\text{O}^-])\text{N}=\text{C}([\text{N}^+](\text{=O})[\text{O}^-])\text{N}1\text{NC}1\text{N}=\text{C}([\text{N}^+](\text{=O})[\text{O}^-])\text{N}=\text{C}([\text{N}^+](\text{=O})[\text{O}^-])\text{N}1\text{N}[\text{N}^+](\text{=O})[\text{O}^-]$ | 1.816 | 537.8 | 8.54 | 28.5 | 146.9 | 1 |
| $\text{N}=\text{c}1\text{onc}(\text{C}=\text{N}[\text{N}^+](\text{=O})[\text{O}^-])\text{n}1[\text{N}^+](\text{=O})[\text{O}^-]$                                                                                                                                                                                                                                           | 1.842 | 198   | 8.54 | 33.5 | 122.6 | 1 |
| $\text{Nn}1\text{nc}([\text{N}^+](\text{=O})[\text{O}^-])\text{c}2\text{nnc}([\text{N}^+](\text{=O})[\text{O}^-])\text{nc}21$                                                                                                                                                                                                                                              | 1.855 | 489.4 | 8.53 | 32.9 | 245.6 | 1 |
| $\text{Nc}1\text{nc}([\text{N}^+](\text{=O})[\text{O}^-])\text{n}2\text{onc}([\text{N}^+](\text{=O})[\text{O}^-])\text{c}12$                                                                                                                                                                                                                                               | 1.891 | 334.9 | 8.53 | 33.9 | 243.2 | 1 |
| $\text{NC}(\text{N})=\text{c}1\text{nc}([\text{N}^+](\text{=O})[\text{O}^-])\text{nn}c1=\text{C}([\text{N}^+](\text{=O})[\text{O}^-])[\text{N}^+](\text{=O})[\text{O}^-]$                                                                                                                                                                                                  | 1.885 | 255.8 | 8.53 | 32.9 | 236.1 | 1 |
| $\text{Nc}1\text{nc}([\text{N}^+](\text{=O})[\text{O}^-])\text{nc}2\text{c}1\text{nnn}2[\text{N}^+](\text{=O})[\text{O}^-]$                                                                                                                                                                                                                                                | 1.875 | 426.3 | 8.53 | 33.3 | 209.2 | 1 |
| $\text{Nc}1\text{nc}([\text{N}^+](\text{=O})[\text{O}^-])[\text{nH}]\text{c}(\text{=NN}[\text{N}^+](\text{=O})[\text{O}^-])\text{c}1[\text{N}^+](\text{=O})[\text{O}^-]$                                                                                                                                                                                                   | 1.883 | 170.4 | 8.53 | 33.5 | 193.2 |   |
| $\text{N}[\text{N}^+](\text{O}^-)\text{c}1\text{cn}2\text{onc}([\text{N}^+](\text{=O})[\text{O}^-])\text{n}12$                                                                                                                                                                                                                                                             | 1.83  | 450.4 | 8.53 | 31.9 | 190   | 1 |
| $\text{Nn}1\text{c}([\text{N}^+](\text{=O})[\text{O}^-])\text{nc}([\text{N}^+](\text{=O})[\text{O}^-])\text{c}1=\text{N}[\text{N}^+](\text{=O})[\text{O}^-]$                                                                                                                                                                                                               | 1.808 | 188   | 8.53 | 32.6 | 163.1 |   |
| $\text{O}=[\text{N}^+](\text{O}^-)\text{N}=\text{Cc}1\text{c}([\text{N}^+](\text{=O})[\text{O}^-])\text{nc}([\text{N}^+](\text{=O})[\text{O}^-])\text{c}2\text{nnn}([\text{N}^+](\text{=O})[\text{O}^-])\text{c}12$                                                                                                                                                        | 1.882 | 573.9 | 8.53 | 32.9 | 156.3 |   |
| $\text{NC}(\text{NC}(\text{=N}[\text{N}^+](\text{=O})[\text{O}^-])[\text{N}^+](\text{=O})[\text{O}^-])=\text{c}1\text{nc}(\text{N}[\text{N}^+](\text{=O})[\text{O}^-])[\text{nH}]\text{n}([\text{N}^+](\text{=O})[\text{O}^-])\text{c}(\text{=C}([\text{N}^+](\text{=O})[\text{O}^-])[\text{N}^+](\text{=O})[\text{O}^-])\text{nc}1\text{N}$                               | 1.86  | 367.8 | 8.53 | 32.1 | 129.4 | 1 |
| $\text{Nc}1\text{nc}([\text{N}^+](\text{=O})[\text{O}^-])\text{c}([\text{N}^+](\text{=O})[\text{O}^-])\text{c}2\text{nnnn}12$                                                                                                                                                                                                                                              | 1.873 | 427.9 | 8.52 | 34.4 | 252.2 | 1 |
| $\text{Nc}1\text{oc}([\text{N}^+](\text{=O})[\text{O}^-])\text{nc}1[\text{N}^+](\text{=O})[\text{O}^-]$                                                                                                                                                                                                                                                                    | 1.876 | -40.3 | 8.52 | 34.4 | 244.8 | 1 |
| $\text{Nc}1\text{nc}([\text{N}^+](\text{=O})[\text{O}^-])\text{nc}2\text{c}1\text{nc}([\text{N}^+](\text{=O})[\text{O}^-])\text{n}2[\text{N}^+](\text{=O})[\text{O}^-]$                                                                                                                                                                                                    | 1.91  | 331.7 | 8.52 | 34.2 | 203.8 |   |
| $\text{N}=\text{c}1\text{c}([\text{N}^+](\text{=O})[\text{O}^-])\text{nc}(\text{C}=\text{N}[\text{N}^+](\text{=O})[\text{O}^-])\text{c}([\text{N}^+](\text{=O})[\text{O}^-])\text{n}1[\text{N}^+](\text{=O})[\text{O}^-]$                                                                                                                                                  | 1.844 | 181.8 | 8.52 | 33.7 | 141.3 | 1 |

|                                                                                 |       |       |      |      |       |   |
|---------------------------------------------------------------------------------|-------|-------|------|------|-------|---|
| NC=C1N=C([N+](=O)[O-])N=C([N+](=O)[O-])N1N[N+](=O)[O-]                          | 1.841 | 150.8 | 8.52 | 32.4 | 134.1 |   |
| Nc1c([N+](=O)[O-])c([N+](=O)[O-])nc2nc(N[N+](=O)[O-])nn12                       | 1.906 | 295.2 | 8.52 | 34.3 | 131.2 |   |
| Nc1nc2onc([N+](=O)[O-])n2c1[N+](=O)[O-]                                         | 1.915 | 314.5 | 8.51 | 34.6 | 266.6 |   |
| NC1=C([N+](=O)[O-])Nc2nc([N+](=O)[O-])nn2C([N+](=O)[O-])=N1                     | 1.936 | 333.4 | 8.51 | 34.2 | 256.3 | 1 |
| Nc1nc([N+](=O)[O-])c2onc([N+](=O)[O-])n12                                       | 1.902 | 319.7 | 8.51 | 34.4 | 243.7 | 1 |
| O=[N+](O)c1cn2ncn([N+](=O)[O-])n12                                              | 1.847 | 363.3 | 8.51 | 32.5 | 199.5 | 1 |
| NC1=c2nc([N+](=O)[O-])nc([N+](=O)[O-])c2=NC(N[N+](=O)[O-])=C([N+](=O)[O-])N1    | 1.945 | 309.5 | 8.51 | 32.4 | 156.2 | 1 |
| NC1=NC(=C([N+](=O)[O-])[N+](=O)[O-])NN1C(N)N[N+](=O)[O-]                        | 1.802 | 169.8 | 8.51 | 30.5 | 152.9 | 1 |
| NN1C=NN2C(=N1)N([N+](=O)[O-])N=C2[N+](=O)[O-]                                   | 1.852 | 493   | 8.51 | 31.9 | 133.1 | 1 |
| NC1=NC(=C([N+](=O)[O-])[N+](=O)[O-])NN1                                         | 1.847 | 155.5 | 8.5  | 31.8 | 203.9 |   |
| Nc1nc([N+](=O)[O-])c2c(nnn2[N+](=O)[O-])c1[N+](=O)[O-]                          | 1.892 | 373.1 | 8.5  | 33.7 | 202.6 |   |
| NN=c1[nH]c([N+](=O)[O-])nc2c([N+](=O)[O-])nc([N+](=O)[O-])nc2c1=NN[N+](=O)[O-]  | 1.899 | 537.4 | 8.5  | 32.5 | 166.9 | 1 |
| O=[N+](O)N=C1Nc2c([N+](=O)[O-])nc([N+](=O)[O-])n21                              | 1.911 | 365.4 | 8.5  | 34.9 | 150.8 | 1 |
| NN=CN1C([N+](=O)[O-])=C([N+](=O)[O-])N=C(N[N+](=O)[O-])N1N                      | 1.831 | 229.1 | 8.5  | 31.6 | 142   | 1 |
| O=[N+](O)N=Cc1nc([N+](=O)[O-])n(C=N[N+](=O)[O-])c(=N[N+](=O)[O-])c1[N+](=O)[O-] | 1.856 | 383.5 | 8.5  | 33.6 | 130.8 | 1 |
| Nc1c(C=N[N+](=O)[O-])nc([N+](=O)[O-])n1[N+](=O)[O-]                             | 1.81  | 197.1 | 8.5  | 32.2 | 129.7 | 1 |
| Nc1nnnc2c([N+](=O)[O-])nnc-2c1[N+](=O)[O-]                                      | 1.898 | 589   | 8.49 | 32.5 | 295.6 | 1 |
| O=[N+](O)N=Cc1nnc2c([N+](=O)[O-])c([N+](=O)[O-])nc([N+](=O)[O-])n12             | 1.876 | 510.7 | 8.49 | 33.5 | 163.5 |   |
| NC1=NC(=C([N+](=O)[O-])[N+](=O)[O-])N(C=N[N+](=O)[O-])N=N1                      | 1.8   | 293.1 | 8.49 | 30.4 | 143   | 1 |
| NC(C=N[N+](=O)[O-])=C1N=C([N+](=O)[O-])N=C([N+](=O)[O-])N1N[N+](=O)[O-]         | 1.826 | 244.7 | 8.49 | 30.9 | 132.3 | 1 |
| Nc1nc([N+](=O)[O-])nc2nc([N+](=O)[O-])nn12                                      | 1.896 | 394.7 | 8.48 | 34.1 | 241   |   |
| NC1=NC(=C([N+](=O)[O-])[N+](=O)[O-])NN1N                                        | 1.818 | 160.1 | 8.48 | 30.8 | 197   |   |
| NC1=C([N+](=O)[O-])N=NC1Nc1c([N+](=O)[O-])n(C=N[N+](=O)[O-])n1[N+](=O)[O-]      | 1.838 | 363.8 | 8.48 | 30.9 | 169.6 | 1 |
| Nc1c([N+](=O)[O-])nn2onc(N[N+](=O)[O-])n3nnnc3c12                               | 1.912 | 630   | 8.48 | 33.8 | 157.9 | 1 |
| N=c1n(C=N[N+](=O)[O-])c(C=N[N+](=O)[O-])c([N+](=O)[O-])n1[N+](=O)[O-]           | 1.823 | 256.9 | 8.48 | 32.2 | 129.8 |   |
| NC1=C([N+](=O)[O-])N=C([N+](=O)[O-])C1=NN[N+](=O)[O-]                           | 1.872 | 131.5 | 8.48 | 32.5 | 126.8 | 1 |
| Nc1c([N+](=O)[O-])cc(N[N+](=O)[O-])n1[N+](=O)[O-]                               | 1.823 | 93.8  | 8.48 | 31.3 | 125.7 | 1 |
| Nn1nc([N+](=O)[O-])c2[nH]nc([N+](=O)[O-])c21                                    | 1.905 | 410.4 | 8.47 | 31.8 | 290.9 |   |
| N=c1n(C=N[N+](=O)[O-])c(N)c([N+](=O)[O-])n1[N+](=O)[O-]                         | 1.836 | 180.8 | 8.47 | 32.2 | 161.6 |   |
| Nc1nc([N+](=O)[O-])n2nc(N[N+](=O)[O-])c([N+](=O)[O-])                           | 1.894 | 344.2 | 8.47 | 33.8 | 132.1 | 1 |

|                                                                                         |       |       |      |      |       |   |
|-----------------------------------------------------------------------------------------|-------|-------|------|------|-------|---|
| )]c2n1                                                                                  |       |       |      |      |       |   |
| O=[N+](=[O-])N=C1[nH]cnc2c([N+](=O)[O-])nc([N+](=O)[O-])nc2c1=N[N+](=O)[O-]             | 1.934 | 400   | 8.47 | 33   | 124.1 | 1 |
| N=C1[nH]c([N+](=O)[O-])nc([N+](=O)[O-])c1[N+](=O)[O-]                                   | 1.9   | -34   | 8.46 | 34.1 | 245.2 |   |
| NC1=NNC([N+](=O)[O-])=C([N+](=O)[O-])N1N                                                | 1.862 | 153.9 | 8.46 | 32.6 | 221.4 | 1 |
| Nn1nc([N+](=O)[O-])n2nc([N+](=O)[O-])cc2c1=NN[N+](=O)[O-]                               | 1.848 | 478.3 | 8.46 | 32.2 | 216   | 1 |
| O=[N+](=[O-])c1nc([N+](=O)[O-])c2[nH]c([N+](=O)[O-])nc2n1                               | 1.925 | 297.4 | 8.46 | 34.9 | 215.9 |   |
| Nc1nc([N+](=O)[O-])n(C=N[N+](=O)[O-])c1[N+](=O)[O-]                                     | 1.843 | 185.3 | 8.46 | 33.1 | 186.1 | 1 |
| N=[N+](=[O-])NC(=C1N=C(N)N1[N+](=O)[O-])][N+](=O)[O-]                                   | 1.871 | 178.9 | 8.46 | 31.9 | 165.2 | 1 |
| NC1=NN=C([N+](=O)[O-])C([N+](=O)[O-])=C(N)N1[N+](=O)[O-]                                | 1.866 | 71.9  | 8.46 | 33.3 | 151.1 | 1 |
| Nc1nn(C=N[N+](=O)[O-])c2c([N+](=O)[O-])nn([N+](=O)[O-])c12                              | 1.871 | 470.4 | 8.46 | 31.2 | 144.5 |   |
| Nc1nc([N+](=O)[O-])c2nnon(N[N+](=O)[O-])c3nnc1n23                                       | 1.844 | 605.7 | 8.46 | 32.1 | 143.1 | 1 |
| O=[N+](=[O-])c1nc2nnncn2c1[N+](=O)[O-]                                                  | 1.843 | 549.5 | 8.45 | 32.4 | 253.1 | 1 |
| N[N+](=[O-])c1cn2nnnc2c([N+](=O)[O-])c1[N+](=O)[O-]                                     | 1.864 | 537.6 | 8.45 | 34.3 | 207.1 | 1 |
| N[N+](=[O-])C1=NC2=C([N+](=O)[O-])N2N=C1[N+](=O)[O-]                                    | 1.91  | 325.6 | 8.45 | 32.7 | 188   | 1 |
| NC1=NN2C([N+](=O)[O-])=NC([N+](=O)[O-])=NC([N+](=O)[O-])=C2C([N+](=O)[O-])=N1           | 1.914 | 293.1 | 8.45 | 31.7 | 187.7 | 1 |
| N=C1C([N+](=O)[O-])=C([N+](=O)[O-])N1N                                                  | 1.843 | 109.3 | 8.45 | 32.1 | 177.6 | 1 |
| NC1=c2nc([N+](=O)[O-])n([N+](=O)[O-])c2=NN=C([N+](=O)[O-])N1C=N[N+](=O)[O-]             | 1.899 | 417.1 | 8.45 | 32.6 | 171.5 | 1 |
| O=[N+](=[O-])N=Cc1[nH]nc([N+](=O)[O-])c1[N+](=O)[O-]                                    | 1.832 | 196.6 | 8.45 | 32.4 | 167.6 | 1 |
| Nn1nc([N+](=O)[O-])n2c(C=N[N+](=O)[O-])c([N+](=O)[O-])nc2c1=NN[N+](=O)[O-]              | 1.85  | 610.4 | 8.45 | 31.8 | 160.4 | 1 |
| Nc1nc2c([N+](=O)[O-])c([N+](=O)[O-])c([N+](=O)[O-])nn2c1[N+](=O)[O-]                    | 1.902 | 271.2 | 8.44 | 34.7 | 251.1 | 1 |
| NN=c1[nH]c([N+](=O)[O-])nc2c1nc([N+](=O)[O-])n2[N+](=O)[O-]                             | 1.923 | 380.1 | 8.44 | 33.4 | 232.5 |   |
| O=[N+](=[O-])c1cnn2c([N+](=O)[O-])nc([N+](=O)[O-])c2n1                                  | 1.859 | 429.7 | 8.44 | 33   | 228.5 | 1 |
| Nn1nc([N+](=O)[O-])n2c(C=N[N+](=O)[O-])nn([N+](=O)[O-])c3nnc1n3-2                       | 1.86  | 845   | 8.44 | 33.9 | 209.6 |   |
| Nc1nc([N+](=O)[O-])nc2c([N+](=O)[O-])c([N+](=O)[O-])nc-2c(=N[N+](=O)[O-])c1[N+](=O)[O-] | 1.932 | 302.3 | 8.44 | 33.7 | 190.8 | 1 |
| NC1=C([N+](=O)[O-])C(=C(N[N+](=O)[O-])[N+](=O)[O-])N1                                   | 1.887 | 35.6  | 8.44 | 31.7 | 180.7 | 1 |
| Nc1c([N+](=O)[O-])c([N+](=O)[O-])n(C=N[N+](=O)[O-])c1[N+](=O)[O-]                       | 1.845 | 67.9  | 8.44 | 31.8 | 175.2 | 1 |
| Nc1[nH]c(=N[N+](=O)[O-])n(C=N[N+](=O)[O-])c1[N+](=O)[O-]                                | 1.85  | 118.5 | 8.44 | 30.9 | 165.6 |   |
| NN1NC1[N+](=O)[O-]                                                                      | 1.708 | 110.6 | 8.44 | 31.4 | 145.4 | 1 |
| O=[N+](=[O-])Nc1[nH]c2nc([N+](=O)[O-])n3nnnc3c2c1[N+](=O)[O-]                           | 1.962 | 535.8 | 8.44 | 33.5 | 131.1 |   |

|                                                                                                           |       |       |      |      |       |   |
|-----------------------------------------------------------------------------------------------------------|-------|-------|------|------|-------|---|
| Nc1nc([N+](=O)[O-])c2c([N+](=O)[O-])nnoc1-2                                                               | 1.905 | 310.2 | 8.43 | 32.4 | 237.9 | 1 |
| Nc1c(C=N[N+](=O)[O-])c([N+](=O)[O-])nc([N+](=O)[O-])n2[nH]nc(N)n2c1[N+](=O)[O-]                           | 1.941 | 508   | 8.43 | 32.3 | 231.3 | 1 |
| N=C1N=NC([N+](=O)[O-])=C1[N+](=O)[O-]                                                                     | 1.829 | 173.9 | 8.43 | 32.4 | 205.7 |   |
| NC1=NC(=C([N+](=O)[O-])[N+](=O)[O-])N([N+](=O)[O-])C(N)=N1                                                | 1.854 | 109.2 | 8.43 | 31.5 | 168.9 | 1 |
| Nc1nc([N+](=O)[O-])c2nnn([N+](=O)[O-])c2n1                                                                | 1.858 | 434.7 | 8.43 | 33.6 | 156   | 1 |
| NC1=NC(=C([N+](=O)[O-])[N+](=O)[O-])N(C=N[N+](=O)[O-])N=C1[N+](=O)[O-]                                    | 1.831 | 167.4 | 8.43 | 30.2 | 154.4 | 1 |
| NC1=NC(=C([N+](=O)[O-])[N+](=O)[O-])NN1C=N[N+](=O)[O-]                                                    | 1.813 | 221.2 | 8.43 | 30.2 | 123.9 | 1 |
| Nc1nn(N)c([N+](=O)[O-])c1[N+](=O)[O-]                                                                     | 1.843 | 112.9 | 8.42 | 32.2 | 294.5 | 1 |
| Nc1c([N+](=O)[O-])nc([N+](=O)[O-])c2nnnn12                                                                | 1.88  | 492.2 | 8.42 | 34.3 | 248.6 | 1 |
| O=[N+](O)N=C1NC=NN2C(=C1[N+](=O)[O-])c1nnnn1C([N+](=O)[O-])=C2[N+](=O)[O-]                                | 1.904 | 616.8 | 8.42 | 32.1 | 171.1 | 1 |
| NC1=NC(=C(N[N+](=O)[O-])[N+](=O)[O-])N=C1[N+](=O)[O-]                                                     | 1.873 | 51.1  | 8.42 | 31.3 | 136.2 | 1 |
| Nc1[nH]c([N+](=O)[O-])nc1[N+](=O)[O-]                                                                     | 1.879 | 37.8  | 8.41 | 32   | 294   | 1 |
| NN=C1N=C([N+](=O)[O-])C([N+](=O)[O-])=N1                                                                  | 1.821 | 217.4 | 8.41 | 31.3 | 179.5 | 1 |
| NN=c1ncn([N+](=O)[O-])nc1[N+](=O)[O-]                                                                     | 1.793 | 263.8 | 8.41 | 31.4 | 158.9 | 1 |
| O=[N+](O)N=Cc1[nH]c(=N[N+](=O)[O-])n(C=N[N+](=O)[O-])c1[N+](=O)[O-]                                       | 1.822 | 234.7 | 8.41 | 31.3 | 132.6 |   |
| Nn1nc(C=N[N+](=O)[O-])[nH]c1=N[N+](=O)[O-]                                                                | 1.825 | 259.9 | 8.41 | 31.5 | 130.4 | 1 |
| NC1=C([N+](=O)[O-])N2C(N)=C([N+](=O)[O-])NN2C([N+](=O)[O-])=N1                                            | 1.931 | 240.8 | 8.4  | 33.5 | 285   | 1 |
| O=[N+](O)c1cc2onc([N+](=O)[O-])n2c1[N+](=O)[O-]                                                           | 1.88  | 226.1 | 8.4  | 32.9 | 236.5 | 1 |
| NN=c1[nH]c([N+](=O)[O-])nc2c1nnn2N[N+](=O)[O-]                                                            | 1.891 | 516.1 | 8.4  | 31.6 | 180.1 | 1 |
| Nc1cn(N)c(=N[N+](=O)[O-])n1[N+](=O)[O-]                                                                   | 1.808 | 150.4 | 8.4  | 30.4 | 148.7 | 1 |
| Nn1nc([N+](=O)[O-])nc1C=N[N+](=O)[O-]                                                                     | 1.771 | 242.2 | 8.4  | 31.4 | 145.8 |   |
| NC1=C(C=N[N+](=O)[O-])[N-][N+](=O)C(=N[N+](=O)[O-])c2nc([N+](=O)[O-])nc([N+](=O)[O-])c2C([N+](=O)[O-])=N1 | 1.873 | 551.5 | 8.4  | 33.4 | 140.9 | 1 |
| N=c1n(C=N[N+](=O)[O-])c([N+](=O)[O-])c(C=N[N+](=O)[O-])n1[N+](=O)[O-]                                     | 1.817 | 259.9 | 8.4  | 32.2 | 126.3 |   |
| NN=c1[nH]c([N+](=O)[O-])c([N+](=O)[O-])n1N                                                                | 1.853 | 178   | 8.39 | 31.1 | 328.1 |   |
| Nn1nc(C=N[N+](=O)[O-])n2c([N+](=O)[O-])nn([N+](=O)[O-])c3nnc1n3-2                                         | 1.846 | 796.5 | 8.39 | 33.5 | 200   |   |
| NC1=NC(=C(N[N+](=O)[O-])[N+](=O)[O-])N=C([N+](=O)[O-])N1                                                  | 1.845 | 86.3  | 8.39 | 30.3 | 142   | 1 |
| Nn1cnn2c([N+](=O)[O-])nn([N+](=O)[O-])c3nnc1n3-2                                                          | 1.828 | 703.5 | 8.38 | 33.4 | 235   | 1 |
| Nc1nc([N+](=O)[O-])n2oc([N+](=O)[O-])nc12                                                                 | 1.9   | 227   | 8.38 | 33.6 | 234.7 | 1 |
| Nn1c([N+](=O)[O-])nc(C=N[N+](=O)[O-])c1[N+](=O)[O-]                                                       | 1.794 | 201.1 | 8.38 | 31.6 | 196.9 | 1 |
| Nc1nnc2nc([N+](=O)[O-])nc([N+](=O)[O-])nc-2c1=NN[N+](=O)[O-]                                              | 1.89  | 512.3 | 8.38 | 33.3 | 174.8 | 1 |
| NN=c1[nH]c([N+](=O)[O-])nc2c1nc([N+](=O)[O-])n2N[N+](=O)[O-]                                              | 1.904 | 400.1 | 8.38 | 33.7 | 170.4 |   |



|                                                                                                                 |       |       |      |      |       |   |
|-----------------------------------------------------------------------------------------------------------------|-------|-------|------|------|-------|---|
| <chem>Nn1c([N+](=O)[O-])nc2c(nc(C=N[N+](=O)[O-])n2[N+](=O)[O-])c1=N[N+](=O)[O-]</chem>                          | 1.865 | 509.2 | 8.38 | 31.7 | 162.3 |   |
| <chem>O=[N+](([O-])N=Cc1c([N+](=O)[O-])nn2c([N+](=O)[O-])cc(=N[N+](=O)[O-])c([N+](=O)[O-])nc12</chem>           | 1.905 | 453.2 | 8.38 | 32.3 | 158   | 1 |
| <chem>O=[N+](([O-])NC1=C([N+](=O)[O-])N(N[N+](=O)[O-])C([N+](=O)[O-])=CC1=C1N=NN=N1</chem>                      | 1.85  | 450.4 | 8.38 | 30.7 | 142.1 | 1 |
| <chem>NC1=C([N+](=O)[O-])C(=N[N+](=O)[O-])N1C=N[N+](=O)[O-]</chem>                                              | 1.823 | 165.8 | 8.38 | 30.4 | 120.2 | 1 |
| <chem>NC(=C1N=C([N+](=O)[O-])N(N)N1)[N+](=O)[O-]</chem>                                                         | 1.832 | 142.2 | 8.37 | 30.9 | 239.6 |   |
| <chem>Nc1nc([N+](=O)[O-])n([N+](=O)[O-])c1N</chem>                                                              | 1.849 | 59.7  | 8.37 | 31.6 | 227.9 | 1 |
| <chem>O=[N+](([O-])c1cc2nnnn2c([N+](=O)[O-])n1</chem>                                                           | 1.841 | 486.2 | 8.37 | 32.9 | 212.3 | 1 |
| <chem>NN=c1n(N)c([N+](=O)[O-])c(C=N[N+](=O)[O-])n1[N+](=O)[O-]</chem>                                           | 1.809 | 278.2 | 8.37 | 30.2 | 209.2 |   |
| <chem>NN=c1c(=NN[N+](=O)[O-])c2nc([N+](=O)[O-])nn12</chem>                                                      | 1.862 | 461.7 | 8.37 | 32   | 185.9 | 1 |
| <chem>O=[N+](([O-])N=Cc1[nH]c(=N[N+](=O)[O-])[nH]c1[N+](=O)[O-]</chem>                                          | 1.858 | 160.6 | 8.37 | 30.6 | 170.1 |   |
| <chem>NC1=NC(N[N+](=O)[O-])=C([N+](=O)[O-])C([N+](=O)[O-])=Nc2c1nnn2[N+](=O)[O-]</chem>                         | 1.871 | 430.7 | 8.37 | 31.4 | 132.1 | 1 |
| <chem>NN=c1n(C=N[N+](=O)[O-])c(N)c([N+](=O)[O-])n1N[N+](=O)[O-]</chem>                                          | 1.811 | 271.4 | 8.37 | 30.8 | 129.7 |   |
| <chem>NC1=NC(N[N+](=O)[O-])=C([N+](=O)[O-])C(C=N[N+](=O)[O-])=C([N+](=O)[O-])N1[N+](=O)[O-]</chem>              | 1.84  | 193.3 | 8.37 | 30   | 126.2 | 1 |
| <chem>Nc1n[nH]c2c([N+](=O)[O-])nc([N+](=O)[O-])n12</chem>                                                       | 1.914 | 331.4 | 8.36 | 33.4 | 252.3 | 1 |
| <chem>N=c1c([N+](=O)[O-])nc([N+](=O)[O-])c2n1C([N+](=O)[O-])=N2</chem>                                          | 1.92  | 323.2 | 8.36 | 34.4 | 252.1 | 1 |
| <chem>O=[N+](([O-])c1cc2n([N+](=O)[O-])c1N=NN2</chem>                                                           | 1.848 | 414.5 | 8.36 | 30.2 | 214.6 | 1 |
| <chem>NN1C=NC(=C([N+](=O)[O-])[N+](=O)[O-])NC(N[N+](=O)[O-])=C1N=C(N=C(n1cnnn1)[N+](=O)[O-])[N+](=O)[O-]</chem> | 1.795 | 564.7 | 8.36 | 27.4 | 160.2 | 1 |
| <chem>N=c1oc([N+](=O)[O-])nc2c1nnn2N[N+](=O)[O-]</chem>                                                         | 1.889 | 307.3 | 8.36 | 33   | 144.5 | 1 |
| <chem>Nc1nc([N+](=O)[O-])c(N[N+](=O)[O-])[nH]1</chem>                                                           | 1.856 | 68.9  | 8.36 | 32.1 | 143.8 | 1 |
| <chem>NN1N=C([N+](=O)[O-])N2C(N[N+](=O)[O-])=NC([N+](=O)[O-])=NC2=C1C=N[N+](=O)[O-]</chem>                      | 1.871 | 430.3 | 8.36 | 30.6 | 132.7 | 1 |
| <chem>O=[N+](([O-])N=c1[nH]cnc2c([N+](=O)[O-])nn([N+](=O)[O-])c12</chem>                                        | 1.901 | 381.2 | 8.36 | 32.1 | 132   | 1 |
| <chem>Nn1ccn([N+](=O)[O-])c1=NN[N+](=O)[O-]</chem>                                                              | 1.763 | 235.4 | 8.36 | 29.9 | 120   |   |
| <chem>Nc1c([N+](=O)[O-])ncn2c([N+](=O)[O-])nn12</chem>                                                          | 1.872 | 312.1 | 8.35 | 32.3 | 260.8 | 1 |
| <chem>Nc1nc2nc([N+](=O)[O-])c([N+](=O)[O-])nc([N+](=O)[O-])c-2n1</chem>                                         | 1.925 | 315.1 | 8.35 | 33.5 | 250.9 | 1 |
| <chem>NN=c1c2nc([N+](=O)[O-])nc([N+](=O)[O-])c2nc([N+](=O)[O-])n1C=N[N+](=O)[O-]</chem>                         | 1.893 | 468.4 | 8.35 | 32.1 | 166.8 |   |
| <chem>NC(N)=C1N=C([N+](=O)[O-])NN1[N+](=O)[O-]</chem>                                                           | 1.843 | 104   | 8.35 | 31.3 | 158.6 |   |
| <chem>NC1=C(C=N[N+](=O)[O-])C=C([N+](=O)[O-])N=C([N+](=O)[O-])N1[N+](=O)[O-]</chem>                             | 1.807 | 105.9 | 8.35 | 30   | 125.8 | 1 |
| <chem>O=[N+](([O-])N=Cc1nc([N+](=O)[O-])[nH]c(=NN[N+](=O)[O-])c1[N+](=O)[O-]</chem>                             | 1.829 | 225.2 | 8.35 | 31.2 | 124.5 |   |
| <chem>N=c1[nH]c([N+](=O)[O-])nc2c1nc([N+](=O)[O-])n2[N+](=O)[O-]</chem>                                         | 1.932 | 241.9 | 8.34 | 32.8 | 241.9 |   |

|                                                                                                     |       |       |      |      |       |   |
|-----------------------------------------------------------------------------------------------------|-------|-------|------|------|-------|---|
| <chem>N=c1n(N)cc([N+](=O)[O-])n1[N+](=O)[O-]</chem>                                                 | 1.801 | 75.5  | 8.34 | 30   | 239.8 |   |
| <chem>Nc1c(N=C([N+](=O)[O-])[N+](=O)[O-])[nH]n1C=N[N+](=O)[O-]</chem>                               | 1.827 | 170.3 | 8.34 | 30.3 | 163.7 | 1 |
| <chem>NC1=NC(=C(N[N+](=O)[O-])[N+](=O)[O-])N(N)N1</chem>                                            | 1.799 | 161.7 | 8.34 | 29.6 | 162.9 |   |
| <chem>Nc1c([N+](=O)[O-])ncn1N[N+](=O)[O-]</chem>                                                    | 1.824 | 127.3 | 8.34 | 31.2 | 132.9 | 1 |
| <chem>NC1=NC(=C([N+](=O)[O-])[N+](=O)[O-])NNC(N)=C([N+](=O)[O-])C1=N[N+](=O)[O-]</chem>             | 1.863 | 207.8 | 8.34 | 31.4 | 130   | 1 |
| <chem>NC1=NC(=C(N[N+](=O)[O-])[N+](=O)[O-])N([N+](=O)[O-])C(N)=N1</chem>                            | 1.858 | 96.4  | 8.34 | 29.9 | 126.6 | 1 |
| <chem>Nc1nc([N+](=O)[O-])c[nH]c([N+](=O)[O-])nc2nnc([N+](=O)[O-])n12</chem>                         | 1.904 | 439.5 | 8.33 | 32.5 | 240.5 | 1 |
| <chem>N=c1n(C=N[N+](=O)[O-])c([N+](=O)[O-])c([N+](=O)[O-])n1C=N[N+](=O)[O-]</chem>                  | 1.817 | 203.9 | 8.33 | 31.8 | 144   |   |
| <chem>Nc1nnc2nnc([N+](=O)[O-])nn12</chem>                                                           | 1.818 | 607.3 | 8.32 | 31.5 | 257.5 |   |
| <chem>NN=C1NN=NC(N[N+](=O)[O-])=Nc2nnnn21</chem>                                                    | 1.803 | 742.1 | 8.32 | 29.7 | 142.2 | 1 |
| <chem>NC1=NC(NC(=N[N+](=O)[O-])[N+](=O)[O-])N=C1[N+](=O)[O-]</chem>                                 | 1.83  | 11.2  | 8.32 | 31   | 135.6 | 1 |
| <chem>NC1=NON=CN1C1=C([N+](=O)[O-])N1[N+](=O)[O-]</chem>                                            | 1.846 | 230.1 | 8.32 | 31.4 | 126.2 | 1 |
| <chem>NC1=NC(=C([N+](=O)[O-])[N+](=O)[O-])NC1=N[N+](=O)[O-]</chem>                                  | 1.861 | 122.6 | 8.32 | 30.7 | 122.6 | 1 |
| <chem>NN1C(=C[N+](=O)[O-])N=C([N+](=O)[O-])N1C=N[N+](=O)[O-]</chem>                                 | 1.773 | 209.4 | 8.32 | 29.5 | 121.6 |   |
| <chem>NC1=C([N+](=O)[O-])N=NNC([N+](=O)[O-])=N1</chem>                                              | 1.851 | 150.6 | 8.31 | 32   | 268.1 | 1 |
| <chem>NN=c1n(N)cc([N+](=O)[O-])n1[N+](=O)[O-]</chem>                                                | 1.795 | 179.9 | 8.31 | 30.3 | 237.6 |   |
| <chem>NN1C(=C[N+](=O)[O-])N=C1[N+](=O)[O-]</chem>                                                   | 1.77  | 136.6 | 8.31 | 28.6 | 189.1 | 1 |
| <chem>NN=c1[nH]c([N+](=O)[O-])nc([N+](=O)[O-])c1C=N[N+](=O)[O-]</chem>                              | 1.859 | 231.4 | 8.31 | 30.4 | 179.1 |   |
| <chem>Nc1nc([N+](=O)[O-])n2[nH]c([N+](=O)[O-])c(N[N+](=O)[O-])n3nnnc3c12</chem>                     | 1.91  | 603.7 | 8.31 | 32.7 | 166.3 | 1 |
| <chem>O=[N+](O-)N=Cn1c([N+](=O)[O-])cnc1[N+](=O)[O-]</chem>                                         | 1.79  | 217.2 | 8.31 | 30.9 | 145.5 | 1 |
| <chem>Nc1c([N+](=O)[O-])n(C=N[N+](=O)[O-])c(=N[N+](=O)[O-])n1N</chem>                               | 1.814 | 155.6 | 8.31 | 30.5 | 140.5 |   |
| <chem>O=[N+](O-)N=Cc1[nH]c(=NN[N+](=O)[O-])[nH]c1[N+](=O)[O-]</chem>                                | 1.838 | 223.4 | 8.31 | 30.8 | 138.5 |   |
| <chem>N=c1c(C=N[N+](=O)[O-])nc([N+](=O)[O-])c(C=N[N+](=O)[O-])n1[N+](=O)[O-]</chem>                 | 1.833 | 280.2 | 8.31 | 30.8 | 135.4 | 1 |
| <chem>O=[N+](O-)C1=NC2=C([N+](=O)[O-])NC([N+](=O)[O-])=NC([N+](=O)[O-])=C([N+](=O)[O-])C2=N1</chem> | 1.881 | 165.2 | 8.3  | 31.4 | 208.5 | 1 |
| <chem>NN=c1c2c(nnn2N)c([N+](=O)[O-])c([N+](=O)[O-])n1N[N+](=O)[O-]</chem>                           | 1.847 | 492.5 | 8.3  | 32   | 190.4 | 1 |
| <chem>N=c1[nH]c([N+](=O)[O-])nc2c1nc([N+](=O)[O-])n2N[N+](=O)[O-]</chem>                            | 1.922 | 255.7 | 8.3  | 32.4 | 182.7 |   |
| <chem>NC1=NC(=C(N[N+](=O)[O-])[N+](=O)[O-])NN1</chem>                                               | 1.825 | 111   | 8.3  | 29.5 | 174.7 | 1 |
| <chem>N=c1c(C=N[N+](=O)[O-])c([N+](=O)[O-])n2nnnc2n1[N+](=O)[O-]</chem>                             | 1.867 | 613.9 | 8.3  | 31.6 | 172.5 | 1 |
| <chem>Nc1c([N+](=O)[O-])nc([N+](=O)[O-])n1C=N[N+](=O)[O-]</chem>                                    | 1.814 | 158.9 | 8.3  | 31.3 | 164.7 | 1 |
| <chem>NN1NC(=C[N+](=O)[O-])N=C1N[N+](=O)[O-]</chem>                                                 | 1.763 | 226.8 | 8.3  | 28.1 | 131.9 |   |

|                                                                                                                |       |       |      |      |       |   |
|----------------------------------------------------------------------------------------------------------------|-------|-------|------|------|-------|---|
| <chem>Nc1nc([N+](=O)[O-])n2c(C=N[N+](=O)[O-])nn([N+](=O)[O-])c12</chem>                                        | 1.828 | 435.8 | 8.3  | 32.1 | 121.1 | 1 |
| <chem>NN=c1n(N)c([N+](=O)[O-])c([N+](=O)[O-])n1N</chem>                                                        | 1.814 | 269   | 8.29 | 30.9 | 328.4 |   |
| <chem>Nn1c([N+](=O)[O-])n[nH]c1=NC=N[N+](=O)[O-]</chem>                                                        | 1.822 | 278.2 | 8.29 | 31   | 238.1 | 1 |
| <chem>O=[N+](O)c1nc([N+](=O)[O-])n2ncnc12</chem>                                                               | 1.826 | 553.3 | 8.29 | 31.5 | 226.8 | 1 |
| <chem>NN=c1n(N)c(N)c([N+](=O)[O-])n1N[N+](=O)[O-]</chem>                                                       | 1.805 | 267   | 8.29 | 30.3 | 226.4 |   |
| <chem>NN1NC(=C[N+](=O)[O-])N=C1[N+](=O)[O-]</chem>                                                             | 1.784 | 196.8 | 8.29 | 30   | 223.7 |   |
| <chem>Nc1nc2n([N+](=O)[O-])nc([N+](=O)[O-])n2c1C=N[N+](=O)[O-]</chem>                                          | 1.843 | 475   | 8.29 | 31.1 | 164.7 | 1 |
| <chem>NC1=Nc2c([N+](=O)[O-])nn([N+](=O)[O-])c2N=C([N+](=O)[O-])N1C=N[N+](=O)[O-]</chem>                        | 1.869 | 415.8 | 8.29 | 30.9 | 161.2 | 1 |
| <chem>N=C1NC(=N[N+](=O)[O-])N1C=N[N+](=O)[O-]</chem>                                                           | 1.802 | 232.1 | 8.29 | 28.6 | 140.1 | 1 |
| <chem>Nn1cnn(C=N[N+](=O)[O-])nc([N+](=O)[O-])n1C=N[N+](=O)[O-]</chem>                                          | 1.757 | 364.4 | 8.29 | 30.3 | 136.6 | 1 |
| <chem>N=c1[nH]c([N+](=O)[O-])c([N+](=O)[O-])[nH]1</chem>                                                       | 1.89  | -71.7 | 8.28 | 31   | 274.6 |   |
| <chem>Nc1noc([N+](=O)[O-])n1</chem>                                                                            | 1.792 | 71.5  | 8.28 | 31   | 258.9 |   |
| <chem>N=c1[nH]c(N[N+](=O)[O-])c([N+](=O)[O-])n1N</chem>                                                        | 1.833 | 132.9 | 8.28 | 31   | 188.9 |   |
| <chem>O=[N+](O)N=Cc1nc2oc([N+](=O)[O-])nn2c1[N+](=O)[O-]</chem>                                                | 1.86  | 330.8 | 8.28 | 32.4 | 178.9 | 1 |
| <chem>O=[N+](O)N=CC1=C([N+](=O)[O-])N=C([N+](=O)[O-])NC([N+](=O)[O-])=N1</chem>                                | 1.838 | 102.4 | 8.28 | 31.5 | 153.6 | 1 |
| <chem>NC1=NC(=C(N[N+](=O)[O-])[N+](=O)[O-])N(N)C([N+](=O)[O-])=C([N+](=O)[O-])C1=C1N=NN=N1</chem>              | 1.853 | 484.4 | 8.28 | 28.6 | 145.6 | 1 |
| <chem>Nc1c(N[N+](=O)[O-])nn2c([N+](=O)[O-])nn(N)c12</chem>                                                     | 1.855 | 365   | 8.28 | 31   | 141.6 |   |
| <chem>NC1=NC([N+](=O)[O-])=NC(=C2NN([N+](=O)[O-])C(=C(N[N+](=O)[O-])[N+](=O)[O-])N=C2N)N=C1[N+](=O)[O-]</chem> | 1.849 | 387.6 | 8.28 | 27.8 | 141.1 | 1 |
| <chem>NN1N=C([N+](=O)[O-])N2NC(C=N[N+](=O)[O-])=NN=C12</chem>                                                  | 1.838 | 519.7 | 8.28 | 29.5 | 131.3 | 1 |
| <chem>O=[N+](O)N=CN=c1[nH]c([N+](=O)[O-])nc2c1nc([N+](=O)[O-])n2N[N+](=O)[O-]</chem>                           | 1.876 | 422.4 | 8.28 | 30.8 | 126.9 |   |
| <chem>O=[N+](O)N=c1[nH]ccn1[N+](=O)[O-]</chem>                                                                 | 1.805 | 139.1 | 8.28 | 30.2 | 124.2 |   |
| <chem>Nn1nc([N+](=O)[O-])n2nc([N+](=O)[O-])cc12</chem>                                                         | 1.825 | 379.8 | 8.27 | 30.1 | 279.7 |   |
| <chem>N=c1n(N)c(N)c([N+](=O)[O-])n1[N+](=O)[O-]</chem>                                                         | 1.852 | 77.4  | 8.27 | 31.2 | 261.5 |   |
| <chem>NN=c1n(N)c(N)c([N+](=O)[O-])n1[N+](=O)[O-]</chem>                                                        | 1.824 | 195.3 | 8.27 | 30.2 | 241   |   |
| <chem>NC1=C([N+](=O)[O-])C([N+](=O)[O-])=Nc2c([N+](=O)[O-])nc([N+](=O)[O-])c3nnc1n23</chem>                    | 1.872 | 446   | 8.27 | 31.9 | 219.9 | 1 |
| <chem>Nn1nc([N+](=O)[O-])c2[nH]nc(N[N+](=O)[O-])c21</chem>                                                     | 1.889 | 364.8 | 8.27 | 31.5 | 159.9 |   |
| <chem>N=c1n(N)c([N+](=O)[O-])c([N+](=O)[O-])n1N</chem>                                                         | 1.836 | 135.2 | 8.26 | 31.1 | 312.5 |   |
| <chem>O=[N+](O)c1cn2nnc3c(c([N+](=O)[O-])nn3[N+](=O)[O-])c2n1</chem>                                           | 1.84  | 661.9 | 8.26 | 31.6 | 203.5 |   |
| <chem>N=c1c(C=N[N+](=O)[O-])c2nnc-2c([N+](=O)[O-])nn1[N+](=O)[O-]</chem>                                       | 1.884 | 617.5 | 8.26 | 30.9 | 202.9 | 1 |
| <chem>Nn1nc([N+](=O)[O-])n2c(C=N[N+](=O)[O-])nnc12</chem>                                                      | 1.804 | 563.6 | 8.26 | 30.5 | 185.7 | 1 |
| <chem>N=c1c2nc([N+](=O)[O-])n(C=N[N+](=O)[O-])c2nc([N+](=O)[O-])n1[N+](=O)[O-]</chem>                          | 1.879 | 404.3 | 8.26 | 32.8 | 174.4 |   |

|                                                                                |       |       |      |      |       |   |
|--------------------------------------------------------------------------------|-------|-------|------|------|-------|---|
| O=[N+](=[O-])C1=Cc2nn[nH]c2N=C([N+](=O)[O-])N1[N+](=O)[O-]                     | 1.88  | 330   | 8.26 | 32.8 | 133.2 | 1 |
| O=[N+](=[O-])C1=Cn2nnc([N+](=O)[O-])c21                                        | 1.839 | 387.6 | 8.25 | 29.2 | 253.1 | 1 |
| NN=c1c([N+](=O)[O-])c(C=N[N+](=O)[O-])nc([N+](=O)[O-])n1C=N[N+](=O)[O-]        | 1.818 | 322.2 | 8.25 | 29.8 | 156.2 |   |
| NC1=C(C=N[N+](=O)[O-])N=C([N+](=O)[O-])N=C([N+](=O)[O-])N1C=N[N+](=O)[O-]      | 1.825 | 185.9 | 8.25 | 28.7 | 147.7 | 1 |
| N[N+](=[O-])c1cn2c([N+](=O)[O-])nc([N+](=O)[O-])nc2n1                          | 1.856 | 452.3 | 8.25 | 31.7 | 147.5 | 1 |
| NC(C=N[N+](=O)[O-])=C1N=C([N+](=O)[O-])N=C([N+](=O)[O-])N1C=N[N+](=O)[O-]      | 1.83  | 200.7 | 8.25 | 29.4 | 141.7 |   |
| NN=c1[nH]nc([N+](=O)[O-])o1                                                    | 1.853 | 121.5 | 8.24 | 31.4 | 301.6 |   |
| Nn1ncc2c([N+](=O)[O-])nn([N+](=O)[O-])c21                                      | 1.82  | 375.5 | 8.24 | 30.4 | 209.9 |   |
| Nc1nnc([N+](=O)[O-])c1C=N[N+](=O)[O-]                                          | 1.771 | 344   | 8.24 | 29.7 | 177.6 |   |
| Nc1nc([N+](=O)[O-])nc2c(nc(C=N[N+](=O)[O-])n2[N+](=O)[O-])c1=N[N+](=O)[O-]     | 1.887 | 482.5 | 8.24 | 30.9 | 132.9 | 1 |
| NC1=C([N+](=O)[O-])N=C(C=N[N+](=O)[O-])C1=N[N+](=O)[O-]                        | 1.839 | 142.7 | 8.24 | 29.3 | 132.9 | 1 |
| O=[N+](=[O-])N=CC(=C1N=C([N+](=O)[O-])N1C=N[N+](=O)[O-])[N+](=O)[O-]           | 1.797 | 163.3 | 8.24 | 29.9 | 131.4 | 1 |
| Nc1c([N+](=O)[O-])nc([N+](=O)[O-])c2nonc12                                     | 1.904 | 308.1 | 8.23 | 31.5 | 265.9 | 1 |
| N=c1c([N+](=O)[O-])ncc2c([N+](=O)[O-])nn([N+](=O)[O-])c2c1[N+](=O)[O-]         | 1.886 | 324.7 | 8.23 | 31.6 | 200.3 | 1 |
| NC1=CN2N=C([N+](=O)[O-])C([N+](=O)[O-])=NC([N+](=O)[O-])=C2C([N+](=O)[O-])=N1  | 1.905 | 249.7 | 8.23 | 31.4 | 185.6 | 1 |
| NN=c1[nH]c(N[N+](=O)[O-])c([N+](=O)[O-])n1N                                    | 1.829 | 213   | 8.23 | 31.9 | 184.7 |   |
| NC1=C(C=N[N+](=O)[O-])N(C=N[N+](=O)[O-])C([N+](=O)[O-])=NC([N+](=O)[O-])=N1    | 1.828 | 177.1 | 8.23 | 28.8 | 151.8 | 1 |
| O=[N+](=[O-])N=Cc1ncc([N+](=O)[O-])n1[N+](=O)[O-]                              | 1.751 | 212.5 | 8.23 | 30.5 | 120.6 | 1 |
| Nc1nc2nnc-2c([N+](=O)[O-])nc1[N+](=O)[O-]                                      | 1.887 | 484.7 | 8.22 | 31.5 | 271.7 | 1 |
| N=C1NC([N+](=O)[O-])=C1[N+](=O)[O-]                                            | 1.865 | -7.4  | 8.22 | 31.1 | 220.9 | 1 |
| Nc1nc2nnc([N+](=O)[O-])c2nc1[N+](=O)[O-]                                       | 1.855 | 400.4 | 8.22 | 32.5 | 204.1 | 1 |
| Nc1nc2[nH]c([N+](=O)[O-])c([N+](=O)[O-])n(C=N[N+](=O)[O-])c=2c1=NN[N+](=O)[O-] | 1.907 | 320.8 | 8.22 | 29.6 | 179.2 | 1 |
| Nn1nc([N+](=O)[O-])c2c1nc(C=N[N+](=O)[O-])n2[N+](=O)[O-]                       | 1.819 | 450.8 | 8.22 | 30.6 | 165   | 1 |
| Nc1c(C=N[N+](=O)[O-])nnc2c([N+](=O)[O-])nn([N+](=O)[O-])c12                    | 1.853 | 503.8 | 8.22 | 29.4 | 161.9 | 1 |
| NC1=C([N+](=O)[O-])N=c2c([N+](=O)[O-])nnc2=NN1[N+](=O)[O-]                     | 1.892 | 335.3 | 8.22 | 31.5 | 161.8 | 1 |
| NC1=C([N+](=O)[O-])C([N+](=O)[O-])N(N)C=NC(=C(N[N+](=O)[O-])[N+](=O)[O-])N1    | 1.796 | 66.8  | 8.22 | 28.3 | 156.9 | 1 |
| Nc1nc(C=N[N+](=O)[O-])c([N+](=O)[O-])c(=N[N+](=O)[O-])n1N                      | 1.8   | 197   | 8.22 | 29   | 144.6 | 1 |
| Nc1c([N+](=O)[O-])nc(N[N+](=O)[O-])c2nonc12                                    | 1.901 | 273.9 | 8.22 | 30.7 | 144.4 | 1 |
| Nc1[nH]c(=NN[N+](=O)[O-])[nH]c1[N+](=O)[O-]                                    | 1.86  | 115.8 | 8.21 | 30.9 | 235.7 |   |
| O=[N+](=[O-])c1nc([N+](=O)[O-])n2ncoc12                                        | 1.853 | 264.2 | 8.21 | 31.6 | 232.7 |   |

|                                                                                                  |       |       |      |      |       |   |
|--------------------------------------------------------------------------------------------------|-------|-------|------|------|-------|---|
| $N=c1nc([N+](=O)[O-])c(C=N[N+](=O)[O-])c([N+](=O)[O-])n1N$                                       | 1.823 | 226.9 | 8.21 | 30.2 | 210.2 | 1 |
| $Nc1c([N+](=O)[O-])nn2c([N+](=O)[O-])c([N+](=O)[O-])nc2c1C=N[N+](=O)[O-]$                        | 1.884 | 398   | 8.21 | 31.6 | 204.9 | 1 |
| $N=c1n(N)c(N[N+](=O)[O-])c([N+](=O)[O-])n1N$                                                     | 1.801 | 203.4 | 8.21 | 30.3 | 184   |   |
| $O=[N+](O)N=c1[nH]cnc2c([N+](=O)[O-])nc([N+](=O)[O-])n12$                                        | 1.879 | 334   | 8.21 | 32.6 | 149.3 | 1 |
| $NC1=Nc2c(nc([N+](=O)[O-])n2[N+](=O)[O-])C1=NN[N+](=O)[O-]$                                      | 1.846 | 367.6 | 8.21 | 29.5 | 135.8 | 1 |
| $O=[N+](O)N=c1[nH]cnc2c([N+](=O)[O-])nc([N+](=O)[O-])nc12$                                       | 1.897 | 282.8 | 8.21 | 31.4 | 131.3 |   |
| $NC1=NN(N)C([N+](=O)[O-])=NN1C(N1C([N+](=O)[O-])N=C([N+](=O)[O-])N1C=N[N+](=O)[O-])[N+](=O)[O-]$ | 1.813 | 299.3 | 8.21 | 29.4 | 125.9 | 1 |
| $NC1C([N+](=O)[O-])=NC=NC1=C(N[N+](=O)[O-])[N+](=O)[O-]$                                         | 1.794 | -8.7  | 8.21 | 29.2 | 123.7 | 1 |
| $NC1=C(N[N+](=O)[O-])C([N+](=O)[O-])=NN2C1=C2[N+](=O)[O-]$                                       | 1.92  | 213.8 | 8.21 | 30.7 | 120.9 | 1 |
| $O=[N+](O)C1=CNN=NC([N+](=O)[O-])=N1$                                                            | 1.818 | 149.3 | 8.2  | 30.9 | 218.4 | 1 |
| $Nn1nc(C=N[N+](=O)[O-])n2c([N+](=O)[O-])nn(C=N[N+](=O)[O-])c3nnc1n3-2$                           | 1.838 | 793.4 | 8.2  | 31.1 | 186.6 | 1 |
| $N=c1c(C=N[N+](=O)[O-])c([N+](=O)[O-])nc([N+](=O)[O-])n1C=N[N+](=O)[O-]$                         | 1.831 | 249.2 | 8.2  | 29.9 | 147.7 | 1 |
| $NN1C([N+](=O)[O-])=CC(=C2N=NN=N2)C(N[N+](=O)[O-])=C([N+](=O)[O-])N1C=N[N+](=O)[O-]$             | 1.802 | 577.2 | 8.2  | 27.7 | 147   | 1 |
| $Nc1nc([N+](=O)[O-])n(N)c(=N[N+](=O)[O-])c1C=N[N+](=O)[O-]$                                      | 1.815 | 204.3 | 8.2  | 29.4 | 144   | 1 |
| $Nc1c([N+](=O)[O-])c([N+](=O)[O-])nc2nc(N)n-2c1[N+](=O)[O-]$                                     | 1.93  | 213.8 | 8.19 | 31.6 | 272.3 | 1 |
| $O=[N+](O)C1=Nc2n[nH]c([N+](=O)[O-])c21$                                                         | 1.879 | 282.2 | 8.19 | 30   | 220.1 | 1 |
| $NC1=Nc2c([N+](=O)[O-])nn([N+](=O)[O-])c21$                                                      | 1.869 | 263.5 | 8.19 | 29.1 | 215.4 | 1 |
| $Nc1nc([N+](=O)[O-])nc(C=N[N+](=O)[O-])c2nc([N+](=O)[O-])n1-2$                                   | 1.888 | 359.7 | 8.19 | 30.2 | 183.4 | 1 |
| $N=c1c([N+](=O)[O-])nc(N[N+](=O)[O-])c2nn[nH]c2c1[N+](=O)[O-]$                                   | 1.929 | 416.8 | 8.19 | 32.2 | 146.2 | 1 |
| $Nn1cnn2nc(N[N+](=O)[O-])c([N+](=O)[O-])c12$                                                     | 1.827 | 364.1 | 8.19 | 30.9 | 128.1 | 1 |
| $NC1=C([N+](=O)[O-])c2c(nc([N+](=O)[O-])n3nnc23)NN=C1[N+](=O)[O-]$                               | 1.909 | 660.1 | 8.18 | 31.1 | 226.3 | 1 |
| $NC1=C(N)n2nc([N+](=O)[O-])c([N+](=O)[O-])c2N=NC(N[N+](=O)[O-])=N1$                              | 1.833 | 389.3 | 8.18 | 29.9 | 174.9 | 1 |
| $O=[N+](O)N=CN1C([N+](=O)[O-])=C[N-]N=C1[N+](=O)[O-]$                                            | 1.788 | 190.1 | 8.18 | 30.9 | 125   | 1 |
| $Nc1nnc([N+](=O)[O-])nc1C=N[N+](=O)[O-]$                                                         | 1.78  | 270.5 | 8.17 | 29.1 | 159   |   |
| $Nc1nc(C=N[N+](=O)[O-])c([N+](=O)[O-])c([N+](=O)[O-])n1$                                         | 1.804 | 175   | 8.17 | 30.1 | 154.4 | 1 |
| $Nc1c([N+](=O)[O-])nc2nnc(N)n2c1[N+](=O)[O-]$                                                    | 1.89  | 349   | 8.16 | 31.2 | 277   |   |
| $Nc1nnc2n(N)nc([N+](=O)[O-])n12$                                                                 | 1.802 | 513.1 | 8.16 | 29.5 | 272   | 1 |
| $O=[N+](O)C1=NN=NC1=NNc1c([N+](=O)[O-])nc2[nH]nnc([N+](=O)[O-])c1-2$                             | 1.893 | 726.3 | 8.16 | 29.8 | 219   | 1 |

|                                                                                  |       |       |      |      |       |   |
|----------------------------------------------------------------------------------|-------|-------|------|------|-------|---|
| $N=c1c2nc([N+](=O)[O-])nc([N+](=O)[O-])c2nc([N+](=O)[O-])n1C=N[N+](=O)[O-]$      | 1.888 | 392.5 | 8.16 | 31.6 | 183.8 |   |
| $NC1=NC([N+](=O)[O-])=c2nc([N+](=O)[O-])n(N[N+](=O)[O-])c2=C(N)N1N$              | 1.845 | 333.4 | 8.16 | 29.5 | 162.5 | 1 |
| $Nc1nc2n([N+](=O)[O-])nc(C=N[N+](=O)[O-])n2n1$                                   | 1.836 | 447   | 8.16 | 30   | 137.1 | 1 |
| $NC1=NC([N+](=O)[O-])=C([N+](=O)[O-])C(C=N[N+](=O)[O-])=NN1N$                    | 1.801 | 180.2 | 8.16 | 29   | 130   | 1 |
| $N=C1C(=N[N+](=O)[O-])NC([N+](=O)[O-])=C1C=N[N+](=O)[O-]$                        | 1.836 | 154.1 | 8.16 | 28.8 | 129   | 1 |
| $NC1=Nc2nnn(N[N+](=O)[O-])c2C(C=N[N+](=O)[O-])=C([N+](=O)[O-])NC1=N[N+](=O)[O-]$ | 1.84  | 607   | 8.16 | 27.5 | 121   | 1 |
| $Nn1cnn2c([N+](=O)[O-])c([N+](=O)[O-])nc12$                                      | 1.81  | 362.3 | 8.15 | 29.8 | 278.6 | 1 |
| $Nc1c([N+](=O)[O-])nc([N+](=O)[O-])c2nnoc12$                                     | 1.889 | 301.3 | 8.15 | 31.2 | 260   | 1 |
| $Nc1nc([N+](=O)[O-])n([N+](=O)[O-])c2c(N)c-2nc1[N+](=O)[O-]$                     | 1.928 | 206.6 | 8.15 | 29.9 | 254.5 | 1 |
| $Nn1cnc([N+](=O)[O-])c1N=C(N=C(n1cnnn1)[N+](=O)[O-])[N+](=O)[O-]$                | 1.774 | 614.7 | 8.15 | 28.6 | 230.3 | 1 |
| $NC1=NC([N+](=O)[O-])=C([N+](=O)[O-])C([N+](=O)[O-])=Nc2nnc(N)n21$               | 1.886 | 364.9 | 8.15 | 30.5 | 224.4 | 1 |
| $Nc1nc([N+](=O)[O-])c2[nH]c([N+](=O)[O-])nc2nnc([N+](=O)[O-])n1C=N[N+](=O)[O-]$  | 1.882 | 506.6 | 8.15 | 30.8 | 209.2 | 1 |
| $Nc1nnnc(C=N[N+](=O)[O-])c1[N+](=O)[O-]$                                         | 1.762 | 341.5 | 8.15 | 29.2 | 207.8 |   |
| $O=[N+](O)N=Cc1nc([N+](=O)[O-])n2c(C=N[N+](=O)[O-])nnc2c1[N+](=O)[O-]$           | 1.845 | 552.3 | 8.15 | 31.1 | 151.2 |   |
| $NN1C=NC([N+](=O)[O-])=NC1=C(C=N[N+](=O)[O-])[N+](=O)[O-]$                       | 1.762 | 173.7 | 8.15 | 28   | 138.6 | 1 |
| $NN1C([N+](=O)[O-])=CC(=C2N=NN=N2)C(N[N+](=O)[O-])N1C=N[N+](=O)[O-]$             | 1.77  | 533.1 | 8.15 | 27.2 | 130.1 | 1 |
| $Nc1c([N+](=O)[O-])n(C=N[N+](=O)[O-])n1N$                                        | 1.782 | 148.4 | 8.14 | 28.8 | 220.7 | 1 |
| $N=c1c2nc([N+](=O)[O-])n(N[N+](=O)[O-])c2c([N+](=O)[O-])c([N+](=O)[O-])n1N$      | 1.855 | 279.7 | 8.14 | 31.2 | 209.8 | 1 |
| $NC1=C(C=N[N+](=O)[O-])NC([N+](=O)[O-])=Nc2c1nc([N+](=O)[O-])n2[N+](=O)[O-]$     | 1.854 | 337.4 | 8.14 | 29.4 | 189.1 | 1 |
| $Nc1nc([N+](=O)[O-])c2nnn([N+](=O)[O-])c2c1C=N[N+](=O)[O-]$                      | 1.867 | 458.4 | 8.14 | 29   | 165.6 |   |
| $NC1=C([N+](=O)[O-])C(=N[N+](=O)[O-])C(C=N[N+](=O)[O-])=N1$                      | 1.82  | 172.2 | 8.14 | 28.7 | 153   | 1 |
| $Nc1c(C=N[N+](=O)[O-])c([N+](=O)[O-])n(C=N[N+](=O)[O-])c1[N+](=O)[O-]$           | 1.817 | 144.3 | 8.14 | 29.2 | 150.8 | 1 |
| $NN=c1onc(C=N[N+](=O)[O-])n1C=N[N+](=O)[O-]$                                     | 1.763 | 255.3 | 8.14 | 28.5 | 122.8 | 1 |
| $O=[N+](O)N=CN=C1C([N+](=O)[O-])=NC([N+](=O)[O-])=C1C=N[N+](=O)[O-]$             | 1.807 | 193.3 | 8.14 | 28.6 | 120.4 | 1 |
| $O=[N+](O)c1nnc2n1c1nnen1c1nnc([N+](=O)[O-])n12$                                 | 1.842 | 891.9 | 8.13 | 30.7 | 264.4 | 1 |
| $Nc1nc(C=N[N+](=O)[O-])c([N+](=O)[O-])c(=NN[N+](=O)[O-])[nH]1$                   | 1.823 | 214.4 | 8.13 | 28.6 | 149   |   |
| $Nc1nc([N+](=O)[O-])n(N)c(=NN[N+](=O)[O-])c1C=N[N+](=O)[O-]$                     | 1.78  | 281.9 | 8.13 | 28.4 | 144.2 |   |
| $NC1=C(C=N[N+](=O)[O-])NC([N+](=O)[O-])=C([N+](=O)[O-])C([N+](=O)[O-])=N1$       | 1.837 | 27    | 8.13 | 30.3 | 136.6 | 1 |

|                                                                                                               |       |       |      |      |       |   |
|---------------------------------------------------------------------------------------------------------------|-------|-------|------|------|-------|---|
| Nn1c(N[N+](=O)[O-])nc([N+](=O)[O-])c2nc(C=N[N+](=O)[O-])nc1-2                                                 | 1.877 | 400.5 | 8.13 | 29.3 | 126.9 | 1 |
| O=[N+](([O-])N=CN=C1C(N[N+](=O)[O-])=C(N[N+](=O)[O-])c2c1ncn2[N+](=O)[O-])                                    | 1.836 | 567.6 | 8.13 | 28.6 | 120.3 | 1 |
| N=c1c([N+](=O)[O-])c2nc(C=N[N+](=O)[O-])n([N+](=O)[O-])c2nn1[N+](=O)[O-]                                      | 1.836 | 456.6 | 8.12 | 30.6 | 173.8 | 1 |
| Nc1nc([N+](=O)[O-])nnc1C=N[N+](=O)[O-]                                                                        | 1.78  | 261.2 | 8.12 | 29   | 163.6 | 1 |
| O=[N+](([O-])N=Cc1n[nH]c2nc([N+](=O)[O-])nc([N+](=O)[O-])c12                                                  | 1.894 | 411.9 | 8.12 | 30.2 | 151.5 | 1 |
| NC1=C(N[N+](=O)[O-])N(N)C([N+](=O)[O-])=C([N+](=O)[O-])C1=C1N=NN=N1                                           | 1.809 | 417.8 | 8.12 | 28.3 | 145.8 |   |
| NC1=NN(N)C([N+](=O)[O-])=NC1=C(C=N[N+](=O)[O-])n([N+](=O)[O-])                                                | 1.757 | 167.4 | 8.12 | 28   | 126.1 | 1 |
| NN=C1NC(N[N+](=O)[O-])=C1[N+](=O)[O-]                                                                         | 1.815 | 205.5 | 8.12 | 28.7 | 122.3 | 1 |
| Nc1noc(=NN[N+](=O)[O-])n1N                                                                                    | 1.765 | 224.4 | 8.11 | 29.4 | 198.9 |   |
| N=c1[nH]c([N+](=O)[O-])nc([N+](=O)[O-])c1C=N[N+](=O)[O-]                                                      | 1.854 | 91.1  | 8.11 | 29.4 | 191.3 |   |
| Nc1c([N+](=O)[O-])c([N+](=O)[O-])nn2c([N+](=O)[O-])c(C=N[N+](=O)[O-])nc2c1=NN[N+](=O)[O-]                     | 1.87  | 541.2 | 8.11 | 30.3 | 176.1 | 1 |
| NN=c1[nH]nc(N[N+](=O)[O-])n1N                                                                                 | 1.779 | 270.6 | 8.11 | 29   | 146.8 | 1 |
| N=c1[nH]c([N+](=O)[O-])nc([N+](=O)[O-])c1N                                                                    | 1.884 | -26.9 | 8.1  | 29.2 | 268.9 |   |
| NC1=NN(N)C([N+](=O)[O-])=NN1N                                                                                 | 1.768 | 298.3 | 8.1  | 29.3 | 243.8 |   |
| Nc1c(C=N[N+](=O)[O-])nnc2c([N+](=O)[O-])c([N+](=O)[O-])nn12                                                   | 1.831 | 439.2 | 8.1  | 30.9 | 189.4 |   |
| O=[N+](([O-])N=Cc1c2c([N+](=O)[O-])nnc-2c1=NN[N+](=O)[O-])                                                    | 1.872 | 467.9 | 8.1  | 28.1 | 160   | 1 |
| N=c1[nH]nc(N[N+](=O)[O-])n1N                                                                                  | 1.798 | 155.1 | 8.1  | 28.6 | 147.7 | 1 |
| NC1=C(N)n2nc([N+](=O)[O-])c(N[N+](=O)[O-])c2NN=N1                                                             | 1.89  | 397.8 | 8.1  | 29.2 | 140.8 | 1 |
| Nc1c([N+](=O)[O-])nc([N+](=O)[O-])c2nn[nH]c12                                                                 | 1.9   | 383.1 | 8.09 | 29.3 | 287.2 | 1 |
| NC1=C([N+](=O)[O-])c2c(nc([N+](=O)[O-])n3nnnc23)NN=N1                                                         | 1.895 | 673.3 | 8.09 | 30.3 | 261.6 | 1 |
| Nc1nc2nc(N[N+](=O)[O-])c([N+](=O)[O-])n[nH]c(=NN[N+](=O)[O-])c-2n1                                            | 1.895 | 261.3 | 8.09 | 30.1 | 166.3 | 1 |
| NN1NC1C=N[N+](=O)[O-]                                                                                         | 1.627 | 190.7 | 8.09 | 26.6 | 150.2 | 1 |
| Nc1noc(=N[N+](=O)[O-])n1N                                                                                     | 1.783 | 100.7 | 8.09 | 29.1 | 137.6 | 1 |
| O=[N+](([O-])N=Cc1[nH]c(=N[N+](=O)[O-])n(C=N[N+](=O)[O-])c1C=N[N+](=O)[O-])                                   | 1.777 | 272.2 | 8.09 | 27.7 | 124.5 |   |
| NN1C=NC([N+](=O)[O-])N1C(C=NC(=C1N=C([N+](=O)[O-])N(C=N[N+](=O)[O-])N1[N+](=O)[O-])[N+](=O)[O-])N[N+](=O)[O-] | 1.775 | 375.1 | 8.09 | 26.9 | 121   | 1 |
| Nc1nc([N+](=O)[O-])n([N+](=O)[O-])c2nc(C=N[N+](=O)[O-])nc1-2                                                  | 1.881 | 356.9 | 8.08 | 29.8 | 202.2 | 1 |
| Nc1c(C=N[N+](=O)[O-])c([N+](=O)[O-])nc2c1nc([N+](=O)[O-])n2N[N+](=O)[O-]                                      | 1.869 | 402.1 | 8.08 | 30.1 | 129.4 | 1 |
| NC(C=N[N+](=O)[O-])=C1N=NN=C1[N+](=O)[O-]                                                                     | 1.758 | 276   | 8.08 | 27.7 | 126.9 |   |
| Nc1c([N+](=O)[O-])nn2c(N)nnc2c1[N+](=O)[O-]                                                                   | 1.864 | 328   | 8.07 | 30.3 | 292.6 | 1 |
| NN1C=C([N+](=O)[O-])N=C([N+](=O)[O-])c2nnn(N)c21                                                              | 1.823 | 373.2 | 8.07 | 27.8 | 229.8 | 1 |

|                                                                                           |       |       |      |      |       |   |
|-------------------------------------------------------------------------------------------|-------|-------|------|------|-------|---|
| <chem>Nc1nc([N+](=O)[O-])c([N+](=O)[O-])c2nnn-2c1C=N[N+](=O)[O-]</chem>                   | 1.838 | 473.3 | 8.07 | 30   | 197.5 | 1 |
| <chem>Nc1nc2c(c([N+](=O)[O-])n1)C([N+](=O)[O-])=NNC([N+](=O)[O-])=N2</chem>               | 1.869 | 351.2 | 8.07 | 30.3 | 183.3 | 1 |
| <chem>NC1=C([N+](=O)[O-])N=CN(N)N1C=N[N+](=O)[O-]</chem>                                  | 1.788 | 154   | 8.07 | 26.5 | 166.8 | 1 |
| <chem>O=[N+](O-)N=Cn1nc([N+](=O)[O-])n2cnn12</chem>                                       | 1.79  | 563.7 | 8.07 | 28.4 | 166.6 | 1 |
| <chem>NN1C=NC1=C(C=N[N+](=O)[O-])[N+](=O)[O-]</chem>                                      | 1.742 | 201.9 | 8.07 | 26.5 | 142.9 | 1 |
| <chem>NC1N=C([N+](=O)[O-])N1C=N[N+](=O)[O-]</chem>                                        | 1.718 | 99.5  | 8.07 | 26.8 | 135.3 | 1 |
| <chem>O=[N+](O-)N=CC1=Nc2nc([N+](=O)[O-])c([N+](=O)[O-])nc2C1=NN[N+](=O)[O-]</chem>       | 1.84  | 464.9 | 8.07 | 29.6 | 133.9 | 1 |
| <chem>Nc1nc([N+](=O)[O-])c2nc([N+](=O)[O-])n(N[N+](=O)[O-])c2c1C=N[N+](=O)[O-]</chem>     | 1.865 | 413.9 | 8.07 | 29.5 | 124.4 | 1 |
| <chem>O=[N+](O-)N=CN1C([N+](=O)[O-])=CC(=C2N=NN=N2)C(N[N+](=O)[O-])=C1[N+](=O)[O-]</chem> | 1.814 | 450.1 | 8.07 | 27.9 | 122.5 | 1 |
| <chem>NC1=NC(=C([N+](=O)[O-])[N+](=O)[O-])N1</chem>                                       | 1.827 | 91.1  | 8.06 | 28.3 | 241.5 | 1 |
| <chem>NC1=c2nnc3n2N(N=C([N+](=O)[O-])N=3)C([N+](=O)[O-])=N1</chem>                        | 1.857 | 609.3 | 8.06 | 30.9 | 230   | 1 |
| <chem>Nc1c([N+](=O)[O-])c([N+](=O)[O-])nc2c([N+](=O)[O-])nn(C=N[N+](=O)[O-])c12</chem>    | 1.881 | 313.3 | 8.06 | 30.1 | 204.5 | 1 |
| <chem>Nc1c([N+](=O)[O-])nc([N+](=O)[O-])c2nnn(C=N[N+](=O)[O-])c12</chem>                  | 1.867 | 483.1 | 8.06 | 29.6 | 202.4 | 1 |
| <chem>Nn1c([N+](=O)[O-])nc2c1nc(C=N[N+](=O)[O-])n2[N+](=O)[O-]</chem>                     | 1.83  | 412.4 | 8.06 | 30.8 | 185.1 | 1 |
| <chem>NN=c1[nH]c([N+](=O)[O-])c(C=N[N+](=O)[O-])n1C=N[N+](=O)[O-]</chem>                  | 1.805 | 272.2 | 8.06 | 28.4 | 181.2 | 1 |
| <chem>N=c1c([N+](=O)[O-])c([N+](=O)[O-])nc(N)n1C=N[N+](=O)[O-]</chem>                     | 1.82  | 146.6 | 8.05 | 29.1 | 206.6 | 1 |
| <chem>Nc1nc([N+](=O)[O-])c2c(nnn2[N+](=O)[O-])c1N</chem>                                  | 1.863 | 326.7 | 8.05 | 30.4 | 197.2 | 1 |
| <chem>NC(=C1N=CN=C([N+](=O)[O-])N1N)[N+](=O)[O-]</chem>                                   | 1.773 | 124.6 | 8.05 | 27.3 | 183.8 |   |
| <chem>NC1=C([N+](=O)[O-])N=C2C([N+](=O)[O-])=NC([N+](=O)[O-])=C2C1=NN[N+](=O)[O-]</chem>  | 1.887 | 286.9 | 8.05 | 29.8 | 154.6 | 1 |
| <chem>Nc1c(C=N[N+](=O)[O-])nc([N+](=O)[O-])c2c1nnn2[N+](=O)[O-]</chem>                    | 1.847 | 421   | 8.05 | 28.6 | 128   | 1 |
| <chem>NC(C=N[N+](=O)[O-])=C1N=C([N+](=O)[O-])N(C=N[N+](=O)[O-])N1</chem>                  | 1.774 | 223.5 | 8.05 | 28   | 120.8 | 1 |
| <chem>O=[N+](O-)N=CN=C1NN=C1[N+](=O)[O-]</chem>                                           | 1.78  | 232.6 | 8.05 | 29.1 | 120.7 | 1 |
| <chem>C=[N+](O-)c1c([N+](=O)[O-])[nH]c(=N[N+](=O)[O-])c(=N)n1N</chem>                     | 1.826 | 142.6 | 8.04 | 28.3 | 285.1 | 1 |
| <chem>NC(N)=C1N=C([N+](=O)[O-])N=C([N+](=O)[O-])N1</chem>                                 | 1.85  | 74.2  | 8.04 | 29.3 | 238   | 1 |
| <chem>Nn1nc([N+](=O)[O-])c2nc([N+](=O)[O-])c([N+](=O)[O-])c(C=N[N+](=O)[O-])c21</chem>    | 1.852 | 367.5 | 8.04 | 30   | 233.6 | 1 |
| <chem>O=[N+](O-)N=CC1=Nn2c(nc([N+](=O)[O-])c2C=N[N+](=O)[O-])C1=NN[N+](=O)[O-]</chem>     | 1.809 | 553.6 | 8.04 | 27.7 | 147.1 | 1 |
| <chem>Nc1c(N[N+](=O)[O-])nc([N+](=O)[O-])c2nnn(N)c12</chem>                               | 1.857 | 419.1 | 8.04 | 28.4 | 146.8 | 1 |
| <chem>Nc1nn(C=N[N+](=O)[O-])c([N+](=O)[O-])c1C=N[N+](=O)[O-]</chem>                       | 1.765 | 229   | 8.04 | 28.1 | 140.5 | 1 |
| <chem>O=[N+](O-)c1cn2n3c(nnc13)N([N+](=O)[O-])C=N2</chem>                                 | 1.807 | 593.5 | 8.04 | 28.6 | 138.3 | 1 |



|                                                                                                 |       |        |      |      |       |   |
|-------------------------------------------------------------------------------------------------|-------|--------|------|------|-------|---|
| O=[N+](O)N=Cn1c([N+](=O)[O-])nn1C(C1=NC=C1[N+](=O)[O-])[N+](=O)[O-]                             | 1.785 | 323.2  | 8.04 | 30.5 | 137.3 | 1 |
| Nc1nc(C=N[N+](=O)[O-])c([N+](=O)[O-])cc([N+](=O)[O-])c1=N[N+](=O)[O-]                           | 1.794 | 187.7  | 8.04 | 28.5 | 122.8 | 1 |
| Nc1ncc([N+](=O)[O-])[n-][n+]=O                                                                  | 1.769 | 107.9  | 8.03 | 29   | 270.4 | 1 |
| Nc1nc([N+](=O)[O-])c2nnc(C=N[N+](=O)[O-])c2c1[N+](=O)[O-]                                       | 1.85  | 470.7  | 8.03 | 29.3 | 216.8 | 1 |
| N=C1N=NC([N+](=O)[O-])=N1                                                                       | 1.751 | 208.3  | 8.03 | 28.3 | 203.7 | 1 |
| O=[N+](O)N=C1OC([N+](=O)[O-])=C1O                                                               | 1.858 | -205.1 | 8.03 | 28.7 | 173.8 | 1 |
| Nc1c([N+](=O)[O-])c(C=N[N+](=O)[O-])c2n(C=N[N+](=O)[O-])nc-2c(C=N[N+](=O)[O-])n1C=N[N+](=O)[O-] | 1.876 | 537.8  | 8.02 | 27.6 | 167.3 | 1 |
| N=C1c2nc([N+](=O)[O-])n(N[N+](=O)[O-])c2N=C(C=N[N+](=O)[O-])N=C([N+](=O)[O-])N1C=N[N+](=O)[O-]  | 1.789 | 498.6  | 8.02 | 26.6 | 127.5 | 1 |
| N=C1OC(=NN[N+](=O)[O-])N1N                                                                      | 1.796 | 25.6   | 8.02 | 28.8 | 122.6 | 1 |
| Nc1nc2nc([N+](=O)[O-])nc(N)n2c1[N+](=O)[O-]                                                     | 1.88  | 274.9  | 8.01 | 30.7 | 279.3 | 1 |
| Nc1nc(N)n([N+](=O)[O-])c1[N+](=O)[O-]                                                           | 1.834 | 42.1   | 8.01 | 30   | 258   | 1 |
| NN=C1N=NC([N+](=O)[O-])=N1                                                                      | 1.74  | 320    | 8.01 | 27.6 | 216.6 | 1 |
| NC1=C([N+](=O)[O-])NC1[N+](=O)[O-]                                                              | 1.823 | -53.3  | 8.01 | 27.8 | 210.5 | 1 |
| Nc1nnc([N+](=O)[O-])c([N+](=O)[O-])ncc(C=N[N+](=O)[O-])n1C=N[N+](=O)[O-]                        | 1.773 | 356    | 8.01 | 29.3 | 152.8 | 1 |
| NC1=NN([N+](=O)[O-])C2=NN12                                                                     | 1.81  | 489.1  | 8.01 | 28.9 | 145   | 1 |
| N=c1c(C=N[N+](=O)[O-])nc([N+](=O)[O-])cn1[N+](=O)[O-]                                           | 1.778 | 149    | 8.01 | 27.9 | 140.4 | 1 |
| O=[N+](O)C1=Cn2nc([N+](=O)[O-])nc21                                                             | 1.835 | 314.9  | 8    | 28.5 | 249.6 | 1 |
| NC(N)=C1N=C([N+](=O)[O-])N=C1[N+](=O)[O-]                                                       | 1.826 | 36.7   | 8    | 29.5 | 214.6 | 1 |
| Nc1nc(C=N[N+](=O)[O-])c([N+](=O)[O-])c2c([N+](=O)[O-])nc([N+](=O)[O-])nc12                      | 1.881 | 344.4  | 8    | 29.1 | 189.7 | 1 |
| Nc1c([N+](=O)[O-])nc(N[N+](=O)[O-])c2nnc(N)c12                                                  | 1.866 | 392.9  | 8    | 29   | 146.9 | 1 |
| N=c1c(C=N[N+](=O)[O-])c2nc(C=N[N+](=O)[O-])n([N+](=O)[O-])c2nn1[N+](=O)[O-]                     | 1.829 | 500.9  | 8    | 28.2 | 137.7 | 1 |
| NN=c1c(C=N[N+](=O)[O-])c(C=N[N+](=O)[O-])nc([N+](=O)[O-])n1C=N[N+](=O)[O-]                      | 1.78  | 379.8  | 8    | 26.7 | 135.2 | 1 |

## References

1. Yin, P., Zhang, J., Mitchell, L. A., Parrish, D. A. & Shreeve, J. M. 3,6-Dinitropyrazolo[4,3-*c*]pyrazole-Based Multipurpose Energetic Materials through Versatile N-Functionalization Strategies. *Angew Chem Int Ed* **55**, 12895–12897 (2016).
2. Schulze, M. C., Scott, B. L. & Chavez, D. E. A High Density Pyrazolo-Triazine Explosive (PTX). *J. Mater. Chem. A* **3**, 17963–17965 (2015).
3. Piercey, D. G., Chavez, D. E., Scott, B. L., Imler, G. H. & Parrish, D. A. An Energetic Triazolo-1,2,4-Triazine and its N-Oxide. *Angew. Chem.* **128**, 15541–15544 (2016).
4. Li, Y., Shu, Y., Wang, B., Zhang, S. & Zhai, L. Synthesis, Structure and Properties of Neutral Energetic Materials Based on N-Functionalization of 3,6-Dinitropyrazolo[4,3-*c*]pyrazole. *RSC Adv.* **6**, 84760–84768 (2016).
5. Yin, P., Zhang, J., He, C., Parrish, D. A. & Shreeve, J. M. Polynitro-Substituted Pyrazoles and Triazoles as Potential Energetic Materials and Oxidizers. *J. Mater. Chem. A* **2**, 3200–3208 (2014).
6. Yin, P., Zhang, Q., Zhang, J., Parrish, D. A. & Shreeve, J. M. N-Trinitroethylamino Functionalization of Nitroimidazoles: A New Strategy for High Performance Energetic Materials. *J. Mater. Chem. A* **1**, 7500–7510 (2013).
7. Zhang, Y., Parrish, D. A. & Shreeve, J. M. Derivatives of 5-Nitro-1,2,3-2H-Triazole – High Performance Energetic Materials. *J. Mater. Chem. A* **1**, 585–593 (2013).
8. He, C., Yin, P., Mitchell, L. A., Parrish, D. A. & Shreeve, J. M. Energetic Aminated-azole Assemblies from Intramolecular and Intermolecular N–H···O and N–H···N Hydrogen Bonds. *Chem. Commun.* **52**, 8123–8126 (2016).
